# Supplementary material for: GeoCGNN: A Geometric-Information-Enhanced Crystal Graph Network for Property Predictions
Source: Research Square preprint supplement (doi:10.21203/rs.3.rs-118453/v1), 2020-12-21
Supplement: Supplementary file 1 [file test_predictions_of_ablation_experiments.xlsx]

## Sheet: read me
note
this document is to show the detail test predictions of our model in ablation experiments.
the sheet name denotes the aggregate function we use, you can find more information in Figure5(b) of our paper.
we utilize the uniformly dataset for all the ablation experiments, that is, train: 27824 val: 9274 test: 9274 in open database Material Project
name description
material id: the material id in open database
predicted: the predicted results of our model.
DFT calculated: the target of in the database.

## Sheet: agg1
name	prediction	target
mp-849675	-2.46997	-2.48929
mp-756392	-2.59551	-2.6252
mp-775445	-1.75618	-1.73387
mp-27760	-0.583051	-0.600461
mp-975368	-0.0551783	-0.0305083
mp-733637	-1.38373	-1.4027
mp-10782	-1.70501	-1.72873
mp-23165	-0.409283	-0.261028
mp-762258	-2.02512	-2.06247
mp-29245	-0.3669	-0.310339
mp-763857	-2.68018	-2.71288
mp-16167	-0.651625	-0.618756
mp-9767	-0.80354	-0.826163
mp-27792	-2.04765	-2.03579
mp-764830	-2.80576	-2.84299
mp-752514	-1.71613	-1.73031
mp-626568	-2.08677	-2.07843
mp-504742	-0.25369	-0.31157
mp-16821	-2.55784	-2.57902
mp-3591	-0.726833	-0.706972
mp-11254	-0.745229	-0.764235
mp-775484	-3.45622	-3.48541
mp-973951	-0.674794	-0.650351
mp-863884	-3.01241	-3.03994
mp-685281	-1.99308	-2.00176
mp-638590	-0.247151	-0.192915
mp-1239	-0.337479	-0.340251
mp-570900	-0.278819	-0.222707
mp-12570	-0.246618	-0.249034
mp-776082	-3.31827	-3.27921
mp-558458	-3.33766	-3.4364
mp-28073	-2.64092	-2.68688
mp-19580	-2.79063	-2.85983
mp-699558	-2.40077	-2.38528
mp-755794	-2.30754	-2.2543
mp-851027	-2.02713	-2.07686
mp-9071	-0.527634	-0.522414
mp-505543	-0.713997	-0.650078
mp-568942	-0.479518	-0.478589
mp-5091	-0.429897	-0.426156
mp-625915	-2.21531	-2.22364
mp-753414	-2.46235	-2.51505
mp-769039	-3.02764	-3.04128
mp-984716	-2.62757	-2.61721
mp-568350	-1.96144	-1.99225
mp-28040	-0.320047	-0.295251
mp-35421	-2.51993	-2.55403
mp-775965	-2.26767	-2.24512
mp-975857	0.205091	0.15189
mp-772231	-2.04129	-1.98945
mp-690526	-1.8864	-1.85189
mp-556135	-1.99993	-2.0429
mp-754010	-1.19045	-1.13948
mp-770231	-2.13286	-2.14464
mp-677138	-2.52067	-2.4992
mp-763011	-2.86583	-2.91686
mp-30311	-0.936501	-0.865423
mp-30460	-0.695076	-0.670611
mp-865866	-0.913283	-0.876126
mp-19575	-1.72429	-1.82213
mp-505270	-2.63514	-2.64802
mp-753656	-2.13168	-2.12354
mp-770097	-1.77922	-1.75978
mp-763320	-2.87449	-2.88322
mp-1009792	0.656626	0.453408
mp-20846	-0.456213	-0.436858
mp-4187	-0.782102	-0.834142
mp-771645	-1.66191	-1.6658
mp-1244	-0.501783	-0.486424
mp-556627	-1.35718	-1.35875
mp-763530	-2.60062	-2.62342
mp-762879	-2.34933	-2.33973
mp-556385	-1.35355	-1.33609
mp-265	-0.60458	-0.684115
mp-773763	-2.13265	-2.03267
mp-541177	-3.22986	-3.26282
mp-764366	-1.32688	-1.27938
mp-690978	-3.43356	-3.38091
mp-676456	-3.54597	-3.55713
mp-760385	0.0187076	0.0935748
mp-24337	-1.79122	-1.84461
mp-17902	-1.75118	-1.7291
mp-698480	-1.76476	-1.78595
mp-978939	0.0559522	0.0579219
mp-687152	-1.49068	-1.44051
mp-769271	-3.3992	-3.44928
mp-31589	-2.11997	-2.1284
mp-1008556	-1.07839	-1.11474
mp-12843	-1.72353	-1.70781
mp-754933	-2.63499	-2.63871
mp-8597	-0.646811	-0.575035
mp-8919	-1.25954	-1.27549
mp-723175	-2.20081	-2.22406
mp-1020616	-2.82695	-2.92406
mp-766176	-2.53614	-2.53597
mp-780483	-2.46555	-2.47012
mp-7094	-1.71077	-1.73344
mp-556717	-1.2084	-1.18401
mp-776618	-2.39816	-2.42733
mp-541140	-0.609865	-0.640536
mp-779925	-2.16602	-2.57264
mp-778698	-1.78372	-1.76375
mp-676780	-0.420459	-0.442569
mp-21401	-0.91635	-0.924938
mp-540540	-2.12087	-2.24174
mp-780204	-2.29742	-2.28816
mp-30644	-0.441256	-0.456467
mp-558967	-1.28667	-1.31006
mp-2914	-0.881981	-0.857201
mp-556661	-3.25861	-3.31249
mp-767031	-3.08926	-3.1117
mp-542839	-0.0900985	-0.0940199
mp-754322	-2.25482	-2.20209
mp-771568	-1.60799	-1.58031
mp-695843	-0.910212	-0.936894
mp-764125	-2.59843	-2.60254
mp-707218	-2.82942	-2.7709
mp-19329	-2.55563	-2.61103
mp-11055	-0.31979	-0.298511
mp-18819	-2.11604	-2.12639
mp-643656	-0.530149	-0.502864
mp-762530	-2.47125	-2.46718
mp-771456	-1.77728	-1.74178
mp-982662	-3.24649	-3.36321
mp-29784	-1.11199	-1.1103
mp-530294	-3.89608	-3.86265
mp-977551	-0.0594048	-0.0501918
mp-555958	-2.88439	-2.87713
mp-555443	-2.04516	-2.06981
mp-771988	-2.24397	-2.23499
mp-767147	-2.47438	-2.5158
mp-4454	-0.542047	-0.487294
mp-505299	-2.60549	-2.60365
mp-567258	-0.385957	-0.365376
mp-11971	-0.887339	-0.91126
mp-18629	-2.88564	-2.91587
mp-776323	-2.28533	-2.25094
mp-1029	-3.7468	-4.18139
mp-763065	-2.18279	-2.24214
mp-601817	-0.177946	-0.0648166
mp-25906	-2.43983	-2.40022
mp-4805	-3.5341	-3.56403
mp-774586	-2.7323	-2.7757
mp-776922	-1.09286	-1.1178
mp-1011260	-2.4403	-2.52754
mp-779766	-1.63494	-1.62086
mp-560387	-3.01138	-3.01307
mp-777912	-2.27504	-2.26018
mp-867177	-0.393582	-0.412057
mp-10489	-0.92233	-0.9637
mp-20108	-0.424913	-0.426986
mp-555151	-1.15947	-1.13992
mp-541735	-1.41135	-1.44029
mp-770014	-2.65616	-2.66526
mp-998147	-1.05898	-1.04573
mp-755751	-4.27535	-4.30487
mp-19178	-0.934956	-1.04962
mp-849514	-2.39825	-2.41029
mp-776733	-3.14511	-3.18002
mp-542164	-1.09861	-1.13185
mp-32324	-2.27809	-2.28247
mp-4122	-2.6373	-2.60255
mp-781082	-2.63808	-2.59185
mp-2489	-0.241932	-0.122809
mp-685606	-1.77126	-1.86446
mp-778276	-2.40616	-2.39227
mp-25755	-2.61009	-2.58724
mp-1156	-0.119692	-0.162561
mp-772195	-3.69	-3.71911
mp-693753	-3.17171	-3.2263
mp-5116	-2.03964	-2.04949
mp-767707	-2.59638	-2.62373
mp-530449	-2.74836	-2.72421
mp-33753	-2.708	-2.70247
mp-769118	-3.11978	-3.10103
mp-4952	-0.312174	-0.319297
mp-770633	-2.26893	-2.28268
mp-15239	-2.90287	-2.92506
mp-569568	-0.575217	-0.570784
mp-777469	-2.40666	-2.45259
mp-761598	-2.74288	-2.78302
mp-510264	-2.62438	-2.68275
mp-622213	-0.703325	-0.757307
mp-667305	-1.94973	-1.95264
mp-3352	-1.00388	-0.994166
mp-972185	-0.00230909	0.0210676
mp-18019	-2.97283	-2.99736
mp-556544	-3.17491	-3.2073
mp-18332	-1.98595	-2.07353
mp-556665	-0.761999	-0.747303
mp-866536	-0.417978	-0.29905
mp-34326	-1.22066	-1.10935
mp-9486	-3.23712	-3.53349
mp-7924	-0.188713	-0.181283
mp-27272	-1.54665	-1.52523
mp-999550	0.0247771	0.0597964
mp-631451	0.698637	0.776139
mp-705333	-2.5247	-2.51892
mp-9775	-0.870611	-0.870939
mp-768015	-1.8388	-1.81265
mp-756118	-3.82564	-3.86239
mp-27775	-2.43301	-2.57197
mp-568782	-0.694002	-0.644146
mp-850481	-2.14082	-2.14208
mp-865878	-0.428314	-0.478647
mp-19732	-1.15542	-1.11639
mp-761431	-2.60952	-2.64819
mp-19114	-2.50276	-2.55958
mp-10003	-0.385635	-0.343186
mp-853199	-2.22344	-2.24662
mp-21900	-1.01719	-1.04914
mp-977579	-0.661327	-0.608965
mp-774223	-1.51735	-1.49264
mp-763701	-2.70145	-2.72469
mp-767810	-2.07851	-2.05511
mp-23326	-2.88247	-2.89005
mp-590	-0.446907	-0.288202
mp-2971	-0.205338	-0.175389
mp-33737	-1.49906	-1.50745
mp-11299	0.00226951	0.00955682
mp-654225	-1.64515	-1.63794
mp-540431	-2.39136	-2.44058
mp-778590	-2.13025	-2.12783
mp-573721	-0.469137	-0.457054
mp-410	-0.9675	-1.08973
mp-24436	-2.17791	-2.1623
mp-558672	-2.70771	-2.73033
mp-771786	-1.32279	-1.3276
mp-771071	-2.35399	-2.38276
mp-23386	-0.602901	-0.617232
mp-672689	-0.690886	-0.686017
mp-19508	-3.16383	-3.19031
mp-11554	-0.969029	-0.911937
mp-1018715	-0.0123761	0.0326237
mp-1008524	-0.276126	-0.302315
mp-13053	-0.460339	-0.461893
mp-763155	-1.73605	-1.71033
mp-756018	-3.02481	-2.91557
mp-637255	-0.315485	-0.307103
mp-770341	-2.5256	-2.56805
mp-764801	-2.05395	-2.07998
mp-16996	-2.68016	-2.70517
mp-31094	-0.709931	-0.693188
mp-780288	-2.23695	-2.23972
mp-690607	-1.10463	-1.25683
mp-20485	-0.497937	-0.511518
mp-5942	-0.880251	-0.930315
mp-570680	-0.894872	-0.871055
mp-11113	-0.694527	-0.690918
mp-4955	-0.410423	-0.416416
mp-768490	-1.9271	-1.99771
mp-763681	-2.0082	-2.00154
mp-625184	-2.19393	-2.18863
mp-30776	-0.00969646	-0.0379159
mp-773925	-2.25113	-2.28127
mp-510564	-0.429653	-0.45033
mp-23013	-2.79915	-2.88363
mp-641191	-2.49307	-2.50626
mp-695515	-3.13353	-3.15227
mp-17660	-1.51035	-1.53735
mp-764286	-2.7413	-2.81315
mp-777911	-2.26196	-2.26791
mp-625652	-1.23824	-1.21091
mp-21014	-0.870374	-0.877852
mp-761814	-2.36089	-2.35259
mp-773081	-2.96641	-2.98814
mp-631549	0.437816	1.27574
mp-767801	-2.40473	-2.36273
mp-566053	-2.25954	-2.27118
mp-771502	-1.91747	-1.89467
mp-976061	-0.470506	-0.371094
mp-744644	-1.54503	-1.5424
mp-770855	-2.42346	-2.43768
mp-764274	-2.61973	-2.72263
mp-771184	-2.05202	-2.03501
mp-566895	-1.70633	-1.70817
mp-33056	0.686033	2.21162
mp-767165	-1.43849	-1.49478
mp-862940	-0.835457	-0.79715
mp-866152	-0.464118	-0.429901
mp-2038	-2.38467	-2.39543
mp-775705	-2.35666	-2.38053
mp-28945	-0.312829	-0.268966
mp-7555	-0.566148	-0.58664
mp-761745	-1.32638	-1.32497
mp-24657	-2.10536	-2.08503
mp-5022	-0.902833	-0.912224
mp-754095	-2.1853	-2.15345
mp-763930	-2.00362	-1.97231
mp-762980	-2.43119	-2.44678
mp-763115	-1.92999	-1.91551
mp-766341	-1.88743	-1.89634
mp-866134	-0.00784599	-0.128009
mp-771795	-1.81676	-1.83249
mp-672979	-2.54799	-2.54481
mp-761392	-2.5377	-2.56061
mp-1270	-2.42804	-2.47208
mp-557604	-3.11847	-3.13285
mp-621131	0.0194054	0.102095
mp-641945	-0.68044	-0.65507
mp-763978	-2.67786	-2.70604
mp-25154	-2.66014	-2.6623
mp-11436	-0.397589	-0.404651
mp-28357	-2.28669	-2.35904
mp-32425	-2.60831	-2.64098
mp-567391	-1.88323	-1.89736
mp-776435	-2.96242	-3.053
mp-556341	-1.51518	-1.48904
mp-6478	-2.77009	-2.7785
mp-764000	-2.62039	-2.62374
mp-540164	-2.17981	-2.19715
mp-767099	-2.41453	-2.42165
mp-541026	-3.21877	-3.25584
mp-772829	-2.73081	-2.74245
mp-769290	-2.16881	-2.15171
mp-541747	-1.94173	-1.95255
mp-861951	-0.518262	-0.558884
mp-32024	-2.55073	-2.55229
mp-778458	-1.99597	-1.96669
mp-23465	-1.67387	-1.70763
mp-12467	-1.01493	-0.988132
mp-8059	-3.26769	-3.28438
mp-766153	-2.09778	-2.11343
mp-556822	-2.36373	-2.39046
mp-20774	-0.58673	-0.588355
mp-569806	-0.881931	-0.870017
mp-569251	-0.682539	-0.645795
mp-13801	-1.06682	-1.16962
mp-543029	-1.52328	-1.53443
mp-743715	-1.60244	-1.25653
mp-775660	-2.23806	-2.22558
mp-769569	-1.35122	-1.35441
mp-756073	-2.65589	-2.69708
mp-769399	-3.3662	-3.41865
mp-8290	-3.35767	-3.41837
mp-973738	-1.37557	-1.03017
mp-570400	-0.229192	-0.230958
mp-558628	-2.46092	-2.47562
mp-17812	-3.23046	-3.23489
mp-22958	-1.15043	-1.06521
mp-1006368	-1.32493	-1.34876
mp-14115	-1.59314	-1.57429
mp-972220	-0.81995	-0.848065
mp-777678	-2.80959	-2.82329
mp-29827	-0.499868	-0.389177
mp-776752	-2.4681	-2.46302
mp-25043	-1.9706	-1.99731
mp-766842	-2.86391	-2.95396
mp-10410	-1.94329	-1.97817
mp-819	-0.11728	-0.114793
mp-561428	-1.70748	-1.67783
mp-14556	-2.87259	-2.91364
mp-776496	-3.14884	-3.1893
mp-558777	-2.6517	-2.66739
mp-849986	-2.70233	-2.71922
mp-5024	-3.08524	-3.13045
mp-559607	-2.79787	-2.80401
mp-769697	-1.15007	-1.00735
mp-996966	-1.00816	-1.01736
mp-778274	-3.68689	-3.72514
mp-770316	-2.51758	-2.56576
mp-645135	-2.72584	-2.80442
mp-1002063	-0.801157	-0.753884
mp-767625	-3.12142	-3.17452
mp-759117	-2.51001	-2.51897
mp-849373	-2.47193	-2.47681
mp-23285	-0.809259	-0.782108
mp-13911	-0.363977	-0.314264
mp-18748	-1.32971	-1.42094
mp-579278	-2.22224	-2.20391
mp-11526	-0.371034	-0.340105
mp-565704	-2.48601	-2.51659
mp-753973	-2.48569	-2.49265
mp-780809	-1.3723	-1.36089
mp-771709	-2.47427	-2.48114
mp-21611	-2.6356	-2.63812
mp-13819	-2.08731	-2.13609
mp-19083	-2.39372	-2.39313
mp-765270	-2.5182	-2.51292
mp-1187	-0.857931	-0.816256
mp-15746	-0.37552	-0.493901
mp-569895	-2.39361	-2.26357
mp-631308	0.253767	0.538691
mp-764088	-2.68049	-2.67113
mp-23626	-1.35414	-1.41096
mp-557203	-3.66137	-3.62928
mp-865402	-0.442774	-0.467329
mp-720212	-3.05063	-3.08908
mp-11225	-0.390737	-0.416154
mp-21810	-0.795876	-0.784689
mp-4264	-2.17689	-2.14661
mp-18257	0.167123	0.0768913
mp-6698	-3.13984	-3.18978
mp-743769	-3.05099	-2.97352
mp-557319	-1.40139	-1.4129
mp-775272	-2.33712	-2.36218
mp-753795	-1.90065	-1.87957
mp-9619	-0.624811	-0.658193
mp-760440	-3.6577	-3.64611
mp-763690	-1.74382	-1.71398
mp-570539	-0.372613	-0.35744
mp-569120	-0.8752	-0.839691
mp-27474	-1.51653	-1.44114
mp-780003	-3.15271	-3.16282
mp-743716	-3.32238	-3.35418
mp-865	-0.245423	-0.409068
mp-32054	-2.47405	-2.44022
mp-561196	-1.14137	-1.13989
mp-29022	-0.761914	-0.754287
mp-19156	-2.46506	-2.47745
mp-777974	-2.333	-2.34325
mp-772573	-2.40365	-2.47473
mp-767608	-2.63994	-2.65491
mp-27384	-0.746561	-0.733316
mp-764210	-2.37742	-2.37117
mp-774395	-2.12581	-2.13472
mp-2468	-0.481533	-0.478854
mp-4564	-2.78437	-2.82543
mp-22850	-0.845774	-0.982917
mp-10973	-0.787271	-0.808157
mp-20971	-0.371728	-0.385301
mp-767711	-2.88694	-2.90771
mp-567325	-0.5817	-0.552628
mp-774178	-1.5459	-1.50925
mp-1014230	-0.188448	-0.186359
mp-765682	-2.41404	-2.38348
mp-773988	-2.3921	-2.42329
mp-22687	-0.33658	-0.343731
mp-850920	-2.38945	-2.39927
mp-570691	-0.231565	-0.259667
mp-2178	-0.555781	-0.614032
mp-1019578	-1.31322	-1.32372
mp-865798	-0.0257236	-0.0984462
mp-706235	-2.5754	-2.57106
mp-541047	-0.818061	-0.803694
mp-684496	-2.32481	-2.26644
mp-863726	-0.744498	-0.747986
mp-556767	-1.09851	-1.11361
mp-675546	-0.167491	-0.177063
mp-570683	-0.352458	-0.362842
mp-849667	-1.71533	-1.69834
mp-756632	-3.11714	-3.14258
mp-29811	-1.11416	-0.980605
mp-634767	-2.42703	-2.4261
mp-1008642	0.1057	0.537247
mp-764267	-2.94869	-2.96537
mp-695984	-2.17841	-2.29882
mp-540424	-2.44674	-2.46447
mp-12463	-0.309553	-0.318521
mp-971673	-0.80407	-0.701125
mp-12789	-0.324196	-0.305394
mp-631527	1.00065	0.929526
mp-623814	-0.667283	-0.627279
mp-556804	-3.23996	-3.25045
mp-21027	-0.658906	-0.687536
mp-5528	-0.57449	-0.568055
mp-565616	-2.91066	-3.04199
mp-571664	-0.588483	-0.556204
mp-558870	-2.32733	-2.31231
mp-772744	-3.15375	-3.15869
mp-762598	-2.49847	-2.49639
mp-773389	-2.55007	-2.53524
mp-20587	-2.36716	-2.47463
mp-976583	0.73769	0.80431
mp-9983	-0.835653	-0.733783
mp-10194	-1.12313	-1.20915
mp-780207	-2.03497	-2.0461
mp-767883	-2.24152	-2.24583
mp-616641	-1.1599	-1.16159
mp-6686	-2.9865	-3.01274
mp-38284	-3.76043	-3.81051
mp-767659	-1.98451	-1.98763
mp-181	-0.181639	-0.166578
mp-5766	-1.70952	-1.67376
mp-767334	-2.6178	-2.63077
mp-21872	-3.91348	-3.93567
mp-31677	-2.39384	-2.43971
mp-4156	-3.00873	-3.05764
mp-18246	-0.89741	-0.917323
mp-770595	-2.10722	-2.17994
mp-639160	-0.725121	-0.716932
mp-1020029	-1.81287	-1.4525
mp-27167	-2.02753	-2.06654
mp-8216	-3.47633	-3.54292
mp-6580	-2.58757	-2.59236
mp-759933	-2.46652	-2.48354
mp-445	-0.0654384	-0.0253077
mp-767872	-2.65431	-2.673
mp-504106	-2.73483	-2.66001
mp-560001	-3.03004	-3.0765
mp-540000	-1.1155	-1.07697
mp-696655	-1.96818	-1.91832
mp-777499	-2.31896	-2.33692
mp-557724	-2.54987	-2.5446
mp-17888	-3.85673	-3.88518
mp-556778	-3.18701	-3.16271
mp-19513	-2.34143	-2.34714
mp-21141	-0.0112171	-0.0806651
mp-767432	-3.00533	-2.99222
mp-540545	-1.28968	-1.30446
mp-19255	-2.36442	-2.45091
mp-759882	-0.807156	-0.88883
mp-31954	-2.46942	-2.47847
mp-765664	-2.36227	-2.3685
mp-8673	-2.00357	-2.0232
mp-676489	-1.2495	-1.27074
mp-734123	-2.26545	-2.30758
mp-761626	-1.71966	-1.70727
mp-647606	-0.51795	-0.461929
mp-8388	-2.5263	-2.55437
mp-754556	-1.06351	-0.984499
mp-568184	-0.49049	-0.50184
mp-722913	-0.724229	-0.772141
mp-669521	-2.21537	-2.20395
mp-853141	-2.39548	-2.39032
mp-613172	-2.15412	-2.16371
mp-571258	-1.04302	-0.905045
mp-971928	0.166311	0.13751
mp-1005689	-0.218977	-0.220253
mp-29580	-0.954528	-0.988954
mp-540260	-2.59216	-2.6267
mp-25662	-1.42572	-1.27813
mp-979981	-0.498336	-0.463714
mp-771916	-1.61756	-1.60275
mp-2534	-0.429606	-0.355646
mp-556932	-2.23743	-2.2658
mp-17260	-0.316193	-0.323288
mp-12657	-0.430641	-0.44338
mp-23742	-2.18909	-2.18904
mp-703515	-2.31319	-2.31154
mp-764732	-2.1218	-2.10772
mp-35530	-1.91256	-1.92348
mp-978962	0.737238	0.869938
mp-566864	-3.02118	-3.06372
mp-30177	-0.232165	-0.216686
mp-12780	-0.568327	-0.596314
mp-976876	-0.130928	-0.0890637
mp-22846	-0.831668	-0.655458
mp-11412	-0.579736	-0.562035
mp-567602	-0.720968	-0.757196
mp-22479	-1.20016	-1.259
mp-764572	-2.44187	-2.44401
mp-25024	-2.73535	-2.74493
mp-697020	-2.61944	-2.66467
mp-997048	-0.180202	-0.202641
mp-570661	-0.519358	-0.580556
mp-19065	-3.70032	-3.73809
mp-862316	-0.694406	-0.691561
mp-555485	-3.10727	-3.14768
mp-32415	-2.61236	-2.63789
mp-2050	-1.10448	-1.11145
mp-557483	-3.5421	-3.75679
mp-558933	-2.14766	-2.15163
mp-772001	-2.29362	-2.30148
mp-570046	-1.02861	-1.11228
mp-772355	-1.27675	-1.25313
mp-769629	-2.60151	-2.60603
mp-760825	-1.88244	-1.82064
mp-780864	-2.0877	-2.06233
mp-761701	-1.50533	-1.47308
mp-8758	-0.461001	-0.298069
mp-631498	0.899096	1.32147
mp-863664	-0.478449	-0.46756
mp-1346	-0.807641	-0.810032
mp-6563	-0.410136	-0.397508
mp-31011	-1.02043	-0.979309
mp-1019279	-0.501057	-0.522685
mp-1007821	-0.154352	-0.102056
mp-770612	-1.63121	-1.67931
mp-775987	-2.72705	-2.76698
mp-568864	-1.7207	-1.71468
mp-26409	-2.72181	-2.75763
mp-763913	-2.35761	-2.35377
mp-565869	-2.72325	-2.7446
mp-760492	-1.40303	-1.42825
mp-867309	-0.721573	-0.702332
mp-566629	-2.46082	-2.49712
mp-558055	-0.85638	-0.842602
mp-27210	-2.48341	-2.51177
mp-2795	-0.663959	-0.807515
mp-631471	0.141561	0.881497
mp-31857	-2.96144	-3.08761
mp-853193	-2.38549	-2.39131
mp-2215	-0.275112	-0.264453
mp-862365	-0.732544	-0.700211
mp-540355	-2.38071	-2.38191
mp-755678	-1.53095	-1.483
mp-763762	-1.0494	-0.883261
mp-11165	-2.91109	-2.93822
mp-7108	-1.03062	-1.00176
mp-562394	-2.94383	-2.96735
mp-25545	-1.78599	-1.77863
mp-566771	-1.66348	-1.70349
mp-9055	-2.87156	-2.90183
mp-762915	-1.16128	-1.17021
mp-757673	-2.77831	-2.84442
mp-758350	-2.40289	-2.42282
mp-770347	-2.30871	-2.36409
mp-572442	-1.45041	-1.46813
mp-27703	-1.54997	-1.50281
mp-38170	-0.59461	-0.3735
mp-504570	-1.69823	-1.72705
mp-757541	-2.48935	-2.47125
mp-557320	-1.73713	-1.74436
mp-1435	-0.194796	-0.217984
mp-1020144	-3.13177	-2.89828
mp-540900	-2.1936	-2.2288
mp-775177	-2.03305	-2.02157
mp-781767	-1.60939	-1.582
mp-683616	-2.94686	-2.97269
mp-675766	-1.58421	-1.33338
mp-685138	-0.927619	-0.86335
mp-774472	-3.00898	-2.98816
mp-558610	-2.47033	-2.54262
mp-757924	-1.26096	-1.24029
mp-561207	-2.78072	-2.80242
mp-36890	-2.04691	-2.09273
mp-12275	-0.567506	-0.563515
mp-552089	-1.84842	-1.85337
mp-999390	0.41566	0.0924871
mp-754369	-1.79762	-1.77655
mp-32431	-2.60912	-2.63811
mp-23138	-1.68771	-1.7225
mp-4896	-1.04834	-1.03895
mp-694945	-2.46297	-2.51644
mp-767151	-2.23509	-2.24303
mp-774964	-2.6191	-2.63943
mp-862364	-0.861403	-0.85278
mp-753946	-1.02929	-1.07558
mp-763897	-2.8467	-2.88025
mp-7104	-3.5036	-3.7408
mp-669471	-0.519638	-0.437769
mp-767985	-2.41816	-2.43194
mp-2513	-0.496274	-0.525295
mp-10378	-0.376665	-0.304957
mp-757840	-2.09907	-2.09028
mp-19230	-2.04249	-2.0733
mp-868647	-2.26597	-2.14147
mp-8812	-3.02885	-3.05475
mp-743583	-2.62915	-2.65102
mp-9757	-3.0141	-3.02671
mp-555575	-0.486614	-0.486324
mp-11769	-0.722609	-0.71967
mp-773887	-2.33829	-2.37286
mp-4527	-2.11405	-2.15691
mp-974613	-0.628969	-0.282547
mp-767245	-3.23497	-3.29284
mp-23909	-0.78846	-0.731694
mp-29210	-0.278242	-0.300512
mp-754960	-2.86882	-2.86986
mp-13456	-1.12633	-1.13868
mp-976828	-0.0489213	-0.0112481
mp-984744	-0.293067	-0.2171
mp-561486	-2.9728	-2.98143
mp-23358	-0.78868	-0.760903
mp-31509	-0.452052	-0.413727
mp-2011	-0.983325	-0.96182
mp-19377	-3.11218	-3.11828
mp-18433	-3.65571	-3.68655
mp-555077	-2.02308	-2.06591
mp-22961	-1.89444	-1.85812
mp-27630	-1.3378	-1.56091
mp-8578	-0.692196	-0.668775
mp-778460	-2.55045	-2.56605
mp-777563	-1.05639	-0.950287
mp-1157	-0.389063	-0.337525
mp-766143	-3.12499	-3.13722
mp-776010	-2.33139	-2.34735
mp-865536	-0.773539	-0.765938
mp-557892	-1.2531	-1.289
mp-12368	-1.84287	-1.97987
mp-524	-0.48667	-0.463169
mp-29398	-1.17332	-1.26244
mp-39995	-2.58668	-2.37536
mp-7748	-2.9608	-2.88152
mp-20506	-0.398391	-0.439259
mp-504752	-2.07927	-2.12617
mp-11550	-0.908815	-0.981719
mp-4748	-2.8196	-2.83352
mp-686909	-3.01888	-3.06447
mp-27413	-0.473696	-0.483916
mp-15826	-0.739582	-0.759634
mp-645272	-1.90754	-1.88286
mp-762358	-1.95183	-1.93838
mp-579560	-1.22057	-1.20704
mp-762906	-1.71348	-1.73903
mp-20948	-0.727515	-0.728945
mp-557071	-1.69534	-1.71938
mp-39140	-2.94962	-2.98129
mp-865527	-0.434833	-0.436769
mp-764510	-2.2267	-2.22038
mp-3612	-2.46569	-2.53832
mp-22146	-0.507918	-0.528303
mp-41109	-3.29687	-3.34508
mp-762249	-1.97974	-1.9607
mp-26541	-2.48942	-2.50834
mp-763997	-2.41526	-2.4258
mp-1640	-0.332818	-0.303145
mp-24799	-0.570116	-0.585337
mp-566764	-1.964	-1.96174
mp-862360	-0.805254	-0.797742
mp-15704	-1.3026	-1.41395
mp-600051	-3.25549	-3.27468
mp-769980	-2.52115	-2.56585
mp-775782	-1.94995	-1.94089
mp-767035	-3.57376	-3.60429
mp-768335	-1.04789	-1.05929
mp-764618	-2.33851	-2.35714
mp-1002081	-1.76619	-1.71813
mp-4016	-0.989685	-0.970155
mp-761395	-2.50255	-2.52608
mp-540467	-2.2586	-2.23877
mp-626851	-1.55007	-1.45359
mp-776761	-2.19055	-2.20468
mp-32537	-1.66641	-1.65467
mp-776233	-1.98242	-2.03692
mp-15795	-1.7092	-1.69644
mp-21104	-0.353257	-0.379508
mp-581834	-0.595862	-0.607681
mp-14430	-2.84199	-2.86718
mp-556210	-1.74406	-1.80202
mp-1006399	-0.364185	-0.331883
mp-12879	-0.981777	-0.983964
mp-4537	-0.793799	-0.806933
mp-763550	-2.54017	-2.54592
mp-866658	-0.885484	-0.903468
mp-989584	-1.4376	-1.34904
mp-763163	-1.46038	-1.44037
mp-3151	-2.83391	-2.86878
mp-6046	-2.40509	-2.43693
mp-25003	-3.20205	-3.27547
mp-4875	-3.68412	-3.71663
mp-743780	-3.07488	-3.12228
mp-558273	-3.37895	-3.40877
mp-542678	-1.90567	-1.92315
mp-566470	-2.55695	-2.58086
mp-1020666	-2.1972	-2.13936
mp-773060	-3.44007	-3.50464
mp-23033	-1.62555	-1.66868
mp-971804	-0.0984286	-0.111993
mp-19037	-2.27953	-2.29324
mp-780172	-3.04897	-3.07076
mp-780103	-2.01997	-2.0178
mp-29008	-1.53719	-1.54104
mp-850149	-3.03191	-3.04902
mp-17679	-2.79403	-2.83615
mp-1018141	0.030921	0.179805
mp-771354	-2.6619	-2.67449
mp-32509	-2.53537	-2.55792
mp-998153	-0.888533	-0.681621
mp-1959	-3.13357	-3.62801
mp-698032	-0.441099	-0.344918
mp-850494	-1.8486	-1.83372
mp-850075	-2.44069	-2.45312
mp-862802	-1.43903	-1.50235
mp-676400	-1.16188	-0.860039
mp-765679	-1.14894	-1.14528
mp-638749	-0.42745	-0.389921
mp-771900	-2.36186	-2.34919
mp-22925	-0.281689	-0.284537
mp-19116	-2.92571	-2.97324
mp-571474	-0.772674	-0.743529
mp-2987	-0.215933	-0.19247
mp-24399	-1.71328	-1.69815
mp-32465	-2.56943	-2.57237
mp-551283	-1.44289	-1.50048
mp-765991	-2.60397	-2.6193
mp-20642	0.0430401	0.0557791
mp-559091	-3.19813	-3.28498
mp-31572	-2.26946	-2.27261
mp-30640	-0.0256138	-0.0282485
mp-11118	-1.34121	-1.36231
mp-30814	-0.454979	-0.379071
mp-974846	1.41615	1.43579
mp-780749	-1.83162	-1.83775
mp-569577	-0.591949	-0.568041
mp-541435	-1.96248	-1.96625
mp-468	-3.878	-3.88983
mp-765814	-1.29697	-1.31564
mp-19820	-0.238988	-0.213064
mp-30419	-0.272639	-0.151851
mp-12762	-0.456936	-0.483353
mp-770345	-2.61747	-2.6014
mp-1523	-0.990958	-0.962951
mp-32061	-2.93485	-2.86373
mp-764796	-2.34124	-2.34822
mp-18474	-0.123579	-0.154308
mp-761661	-1.71984	-1.72383
mp-777554	-1.71474	-1.80585
mp-21440	-0.328785	-0.265577
mp-765042	-2.47423	-2.48969
mp-760062	-3.17986	-3.20637
mp-780553	-2.41561	-2.41988
mp-761768	-2.87277	-2.93827
mp-1013691	-0.822889	-0.839781
mp-35015	-0.682039	-0.694158
mp-754502	-2.93506	-3.20797
mp-769511	-2.3943	-2.40344
mp-642157	-1.63325	-1.57384
mp-541688	-0.920752	-0.875815
mp-15391	-1.85149	-1.89058
mp-9956	-0.18387	-0.179931
mp-775391	-2.76961	-2.76814
mp-861978	-0.783147	-0.743532
mp-542598	-0.192981	-0.196792
mp-754658	-1.30138	-1.34304
mp-978287	0.230403	0.313294
mp-768500	-1.87022	-1.90935
mp-556009	-1.57759	-1.58933
mp-767533	-2.77286	-2.77512
mp-21002	-0.650301	-0.656784
mp-978102	-0.733056	-0.725905
mp-773906	-2.69979	-2.70126
mp-997043	-1.01313	-0.973641
mp-31134	-0.871272	-0.837848
mp-776445	-2.11274	-2.12136
mp-6820	-1.57745	-1.59524
mp-22903	-1.44753	-1.49083
mp-10481	-0.369442	-0.387829
mp-17706	-0.858354	-0.799466
mp-861665	-0.382262	-0.35831
mp-772916	-1.61676	-1.58935
mp-765554	-1.1595	-1.19376
mp-644292	-0.529386	-0.504548
mp-25526	-2.36856	-2.33104
mp-12571	-0.434285	-0.658853
mp-778713	-1.06975	-1.03872
mp-10615	-1.01321	-0.876298
mp-686908	-2.69713	-2.69475
mp-9467	-3.26893	-3.29781
mp-776731	-2.34125	-2.35186
mp-31648	-2.61964	-2.64151
mp-684031	-0.141986	-0.157976
mp-3427	-3.06067	-3.09947
mp-779985	-1.8251	-1.83107
mp-559151	-3.48903	-3.51221
mp-9953	-1.28192	-1.29846
mp-556171	-1.83688	-1.83748
mp-776649	-2.00345	-1.92709
mp-42508	-2.96916	-2.97454
mp-775983	-2.25816	-2.26804
mp-667342	-1.60639	-1.61117
mp-763382	-2.47607	-2.47799
mp-556085	-1.60304	-1.59115
mp-704703	-2.53545	-2.54894
mp-772232	-3.15875	-3.19971
mp-5503	-3.69848	-3.76299
mp-568449	-0.672662	-0.666793
mp-2721	-3.69763	-3.74137
mp-774014	-1.67855	-1.68919
mp-567486	-1.0537	-1.08514
mp-764567	-2.32102	-2.332
mp-555860	-3.27072	-3.20647
mp-29976	-1.2241	-1.22855
mp-975906	-0.127167	-0.0738083
mp-4917	-2.81582	-2.85979
mp-560671	-3.14787	-3.0977
mp-29206	-0.450904	-0.448299
mp-756086	-1.30328	-1.26772
mp-566762	-2.17679	-2.13635
mp-754596	-1.99221	-2.05766
mp-752709	-2.05965	-2.05203
mp-707343	-1.38565	-1.43551
mp-37906	-0.777647	-0.764865
mp-25759	-2.09461	-2.09248
mp-753171	-2.54934	-2.5784
mp-7976	-2.95926	-2.98586
mp-28127	-0.986284	-0.963882
mp-22052	-0.976883	-0.988395
mp-979074	-2.08328	-2.01805
mp-763543	-2.47323	-2.47654
mp-773699	-1.875	-1.78929
mp-9880	-0.552201	-0.521753
mp-2541	-0.384893	-0.381945
mp-776187	-2.25966	-2.29091
mp-31992	-2.54597	-2.55627
mp-510728	-0.321876	-0.305756
mp-705457	-3.31858	-3.35005
mp-11356	-0.533201	-0.57042
mp-558984	-2.01407	-2.08236
mp-567975	-1.38619	-1.44352
mp-12160	-2.80257	-2.83939
mp-772296	-1.6903	-1.70024
mp-765843	-2.26667	-2.27316
mp-672966	-2.30785	-2.32651
mp-31896	-2.13657	-2.18162
mp-624190	-0.851471	-0.83347
mp-978842	-2.47786	-2.20071
mp-777021	-1.722	-1.69854
mp-570232	-2.6846	-2.71063
mp-685108	-0.324529	-0.286172
mp-779167	-2.50109	-2.50838
mp-556936	-2.93531	-2.93172
mp-8484	-0.651342	-1.0595
mp-763803	-2.93334	-2.92287
mp-17829	-2.90096	-2.90086
mp-8507	-0.84272	-0.81072
mp-764003	-2.28795	-2.17893
mp-755417	-3.19221	-3.16747
mp-772435	-2.73206	-2.72426
mp-560016	-2.90949	-2.92476
mp-540554	-1.55904	-1.55012
mp-28235	-0.85746	-0.83714
mp-5273	-1.42673	-1.41542
mp-646397	-2.6956	-2.70107
mp-850923	-2.85307	-2.89025
mp-675784	-0.957109	-0.936317
mp-25750	-2.48457	-2.53304
mp-735063	-1.02598	-1.0808
mp-862936	-0.298128	-0.297147
mp-779090	-2.43199	-2.41726
mp-867887	-0.457752	-0.478354
mp-566620	-2.06096	-2.03669
mp-549490	-2.58866	-2.62484
mp-15382	-2.83883	-2.85558
mp-971763	0.100746	0.269093
mp-765555	-2.48593	-2.49012
mp-336	-0.0959463	-0.0897469
mp-22981	-1.16328	-0.987375
mp-1006150	0.695374	0.680847
mp-765787	-2.06227	-2.01556
mp-765240	-2.93267	-2.91645
mp-1019532	-3.40043	-3.44347
mp-505789	-0.85498	-0.867713
mp-10597	-0.017555	0.00873961
mp-755537	-3.95096	-4.00974
mp-30801	-0.315713	-0.296813
mp-556244	-0.984582	-0.881763
mp-20991	-2.12517	-2.1263
mp-779765	-2.4704	-2.48193
mp-763474	-2.4564	-2.45903
mp-867122	-0.260579	-0.249343
mp-1020022	-2.72205	-2.76378
mp-780522	-2.05357	-2.038
mp-764229	-2.69127	-2.70183
mp-759287	-1.86566	-1.8592
mp-771351	-2.11735	-2.09756
mp-999192	-0.494394	-0.453807
mp-641534	-1.35169	-1.36111
mp-17704	-3.82721	-3.84939
mp-685257	-1.40791	-1.40646
mp-773297	-2.8776	-2.90675
mp-568646	-0.404036	-0.439363
mp-20310	-0.851901	-0.872033
mp-780440	-2.42278	-2.42557
mp-972411	0.0759749	0.0939185
mp-558951	-2.61143	-2.63151
mp-541111	-1.74742	-1.68496
mp-9308	-3.48634	-3.54284
mp-19396	-1.79871	-1.80228
mp-25686	-2.40605	-2.42658
mp-975073	-0.688587	-0.637114
mp-774883	-0.785898	-0.819907
mp-850746	-2.31083	-2.32117
mp-853230	-2.22329	-2.2203
mp-862445	-0.477235	-0.554263
mp-626014	-1.09285	-1.03437
mp-19750	-3.0231	-3.02898
mp-8204	-0.111416	-0.168146
mp-849438	-2.49543	-2.48588
mp-1017983	0.296201	-0.134256
mp-88	0.00187165	0.00848817
mp-541416	-2.50435	-2.5117
mp-759786	-3.30221	-3.34902
mp-541597	-2.65204	-2.78794
mp-680417	-1.40085	-1.41876
mp-978536	-0.487613	-0.470722
mp-555844	-0.89983	-0.956431
mp-557655	-1.80543	-1.81729
mp-684690	-1.64592	-1.67632
mp-541183	-0.652538	-0.602871
mp-777255	-2.33602	-2.3627
mp-776803	-2.90259	-2.85807
mp-744463	-2.44645	-2.4853
mp-866637	-1.01079	-1.02448
mp-777719	-2.78467	-2.80049
mp-17750	-3.18186	-3.23198
mp-753708	-3.42186	-3.44222
mp-28705	-0.572576	-0.619479
mp-853187	-2.72089	-2.72995
mp-555268	-2.56361	-2.50432
mp-772157	-2.98316	-2.99435
mp-762163	-2.46169	-2.48622
mp-752549	-2.12348	-2.18412
mp-6644	-2.85569	-2.8833
mp-753299	-2.09779	-2.12006
mp-863856	-2.14804	-2.1866
mp-770103	-2.79841	-2.76679
mp-556185	-2.78396	-2.78295
mp-767756	-1.98958	-1.98195
mp-764	-0.132839	-0.105673
mp-4950	-3.51575	-3.71906
mp-9799	-1.97961	-1.95125
mp-764677	-2.31489	-2.32451
mp-763100	-2.8391	-2.88681
mp-772587	-2.97731	-3.0019
mp-774910	-1.54724	-1.56251
mp-9612	-2.42595	-2.46633
mp-560905	-2.02781	-2.06876
mp-776344	-2.32614	-2.28972
mp-7099	-0.46143	-0.41381
mp-26591	-2.78042	-2.78662
mp-849699	-2.57009	-2.56726
mp-504848	-1.43671	-1.43668
mp-158	0.166719	0.0134372
mp-16825	-3.10738	-3.16169
mp-752888	-2.35081	-2.32827
mp-776740	-2.13049	-2.15148
mp-756690	-2.14586	-2.13707
mp-653560	-3.6332	-3.66856
mp-9873	-0.498959	-0.563061
mp-29787	-2.32781	-2.32471
mp-850771	-2.4891	-2.50768
mp-867955	-2.62226	-2.66781
mp-31317	-1.2082	-1.15826
mp-616204	-1.5229	-1.45917
mp-773608	-1.7696	-1.75333
mp-542302	-0.707338	-0.712756
mp-771091	-1.88688	-1.85606
mp-4007	-0.80462	-0.811598
mp-8181	-1.22726	-1.13318
mp-864878	-0.536319	-0.537384
mp-769744	-2.2438	-2.2371
mp-510098	-0.441168	-0.410406
mp-30424	-0.166076	-0.153746
mp-14824	-2.06605	-2.08942
mp-695694	-0.68114	-0.65462
mp-21412	-0.0895113	-0.120943
mp-1111	-0.469384	-0.348581
mp-18917	-1.78167	-1.79719
mp-19463	-2.40512	-2.41245
mp-772489	-3.28535	-3.30156
mp-37478	-2.31043	-2.32916
mp-5181	-0.897285	-0.902078
mp-675716	-3.59331	-3.63884
mp-17057	-2.1789	-2.22887
mp-6123	-2.66538	-2.83673
mp-123	-0.00412273	0
mp-1534	-2.297	-2.32719
mp-560466	-2.59257	-2.61978
mp-543108	-1.96867	-1.96114
mp-28855	-2.27711	-2.31899
mp-31849	-2.5354	-2.55074
mp-9634	-0.964663	-1.08201
mp-849354	-2.63132	-2.71358
mp-1136	-0.403027	-0.404565
mp-568430	-0.117084	-0.0720945
mp-782697	-1.71208	-1.73996
mp-777669	-2.88183	-2.9201
mp-975933	-0.469598	-0.463699
mp-758571	-3.25478	-3.32737
mp-550086	-1.99648	-1.98609
mp-768292	-2.27241	-2.24548
mp-673669	-2.05125	-2.03146
mp-676210	-1.81664	-1.85708
mp-4596	-2.45677	-2.49514
mp-757149	-3.99553	-3.95762
mp-647822	-0.487769	-0.324565
mp-486	-0.350795	-0.359562
mp-676799	-0.0298547	-0.0309895
mp-770850	-2.2305	-2.24265
mp-505113	-2.80404	-2.85639
mp-765768	-2.22468	-2.21809
mp-867267	-0.778358	-0.68195
mp-2121	-0.405341	-0.45129
mp-28950	-0.787577	-0.807568
mp-690799	-0.558235	-0.557423
mp-761676	-1.71332	-1.77836
mp-11456	-1.01862	-1.09667
mp-16684	-1.70046	-1.70771
mp-8581	-0.965407	-0.942397
mp-685995	-2.83747	-2.89504
mp-3719	-1.54196	-1.55504
mp-1009213	0.562271	0.426356
mp-540830	-2.05695	-2.06654
mp-28278	-0.753128	-0.754991
mp-2828	-1.8135	-1.94027
mp-764162	-2.62147	-2.62526
mp-778833	-1.66994	-1.63787
mp-777872	-1.64201	-1.65598
mp-571293	-0.89321	-0.888621
mp-26675	-2.48601	-2.50933
mp-20694	-1.6014	-1.58482
mp-626225	-1.46275	-1.45289
mp-744193	-1.82056	-1.81579
mp-772170	-1.54505	-1.51722
mp-849364	-1.91256	-1.84968
mp-620372	-0.613791	-0.572215
mp-22670	-0.98329	-0.992991
mp-972062	-0.543264	-0.553443
mp-763506	-2.36036	-2.47485
mp-766348	-1.64947	-1.66213
mp-777425	-2.34591	-2.36024
mp-566229	-2.3159	-2.28586
mp-8537	-1.99167	-2.13352
mp-9712	-2.41498	-2.50645
mp-2137	-0.16157	-0.171851
mp-542781	-0.106854	-0.107577
mp-781049	-3.12259	-3.14032
mp-866668	-1.12949	-1.10926
mp-11327	-1.02436	-1.02807
mp-770023	-0.187885	0.0747329
mp-754208	-2.93749	-2.96734
mp-569344	-0.791931	-0.804891
mp-697683	-1.04898	-1.03782
mp-8869	-3.02962	-3.02637
mp-559346	-2.98485	-3.01006
mp-12826	-0.032385	-0.0542691
mp-757981	-1.97974	-2.00405
mp-775565	-2.22579	-2.24113
mp-23283	-0.84353	-0.799964
mp-10298	-1.07618	-1.11142
mp-758223	-1.74578	-1.70014
mp-767747	-2.74544	-2.77765
mp-31832	-2.50862	-2.53535
mp-867821	-0.249551	-0.275247
mp-31312	-0.384894	-0.343178
mp-774387	-3.13177	-3.14004
mp-2883	-2.94854	-3.02116
mp-868321	-2.32878	-2.34181
mp-4547	-3.25111	-3.32071
mp-558318	-3.11802	-3.15834
mp-32791	-0.222372	-0.192303
mp-23958	-1.64966	-1.64693
mp-4878	-1.04992	-1.03454
mp-557012	-3.00452	-2.96656
mp-12022	-2.45789	-2.43193
mp-562920	-3.22835	-3.26255
mp-722316	-1.11134	-1.21355
mp-773354	-1.76504	-1.75163
mp-18150	-2.99627	-3.02519
mp-765191	-1.94381	-1.93931
mp-540447	-2.42421	-2.44615
mp-18071	-1.28611	-1.28574
mp-19323	-3.17601	-3.20972
mp-541595	-0.261705	-0.140807
mp-644246	-0.62061	-0.604483
mp-979910	-0.323722	-0.276682
mp-21835	-0.312533	-0.360017
mp-667372	-3.37747	-3.00954
mp-21278	-0.565054	-0.501667
mp-677222	-3.56148	-3.55994
mp-570425	-0.354335	-0.325307
mp-631302	0.27945	0.675702
mp-770959	-2.80463	-2.84483
mp-28487	-0.0571904	-0.0502401
mp-2323	-0.251882	-0.0976105
mp-995226	-0.792757	-0.698682
mp-773030	-2.96165	-2.89963
mp-763441	-1.64445	-1.71533
mp-779072	-2.41703	-2.43988
mp-1017519	1.41601	1.68396
mp-1014212	-0.623373	0.540979
mp-754152	-2.75884	-2.77706
mp-3704	-0.706619	-0.732649
mp-767724	-2.42594	-2.44392
mp-569788	-0.276755	-0.242384
mp-1008376	-0.581434	-0.578496
mp-9318	-1.15158	-1.12221
mp-556374	-2.26527	-2.18629
mp-866216	-0.639388	-0.621118
mp-22089	-1.17874	-1.21283
mp-850292	-1.96154	-1.95399
mp-540704	-2.16366	-2.20124
mp-30171	-0.612565	-0.652603
mp-26312	-2.47647	-2.48161
mp-850277	-1.64892	-1.64545
mp-972439	-2.37076	-2.35095
mp-583234	-0.0942526	-0.0870789
mp-25694	-2.60447	-2.63956
mp-1098	-1.13786	-1.17345
mp-568522	-0.487025	-0.479043
mp-510595	-0.725908	-0.70016
mp-15694	-1.11918	-1.06075
mp-759713	-3.24168	-3.26811
mp-976972	-0.277001	-0.271101
mp-775993	-2.56677	-2.57563
mp-20496	-2.05901	-2.08896
mp-31583	-2.52384	-2.52658
mp-761979	-2.36634	-2.34342
mp-755950	-3.56065	-3.52508
mp-685120	-0.835563	-0.817992
mp-32532	-2.11352	-2.19914
mp-754751	-2.56362	-2.60204
mp-1006056	-0.481152	-0.40721
mp-706657	-2.61336	-2.64912
mp-756951	-2.02588	-2.09931
mp-778868	-2.12207	-2.11771
mp-1018067	0.0241135	0.0651748
mp-980052	-0.305905	-0.232755
mp-707311	-1.97572	-1.96403
mp-770901	-2.02538	-2.01925
mp-39387	-3.36886	-3.43349
mp-770335	-2.53648	-2.51119
mp-1018156	-0.0993504	-0.0633892
mp-558083	-3.35579	-3.41294
mp-20799	-0.411548	-0.449442
mp-643458	-2.04269	-2.07214
mp-866171	-0.780477	-0.778966
mp-16794	-0.601312	-0.642238
mp-555296	-3.27762	-3.22683
mp-780091	-1.94342	-1.96691
mp-780007	-1.96285	-1.96479
mp-865795	-0.344384	-0.366506
mp-761493	-1.92818	-1.93038
mp-765777	-2.57462	-2.53643
mp-20599	-0.234534	-0.218012
mp-972486	0.145324	0.233225
mp-1121	-0.318298	-0.279043
mp-652663	-0.823774	-0.821746
mp-705842	-1.60286	-1.59224
mp-769280	-3.40519	-3.42773
mp-770642	-2.48175	-2.47749
mp-8978	-0.962598	-0.924034
mp-5193	-2.17828	-2.17983
mp-9719	-0.59925	-0.632115
mp-771334	-2.2604	-2.18624
mp-565482	-1.87281	-1.8829
mp-765718	-2.25485	-2.26476
mp-769884	-1.73991	-1.72124
mp-24006	-1.23375	-1.26633
mp-568936	-0.0427069	-0.0714085
mp-1013706	-0.471239	-0.484128
mp-27523	-1.30486	-1.33924
mp-770680	-2.1842	-2.21097
mp-764627	-2.11281	-2.1328
mp-7564	-0.385433	-0.455811
mp-12360	-0.0512006	-0.0881081
mp-765529	-1.91516	-1.93221
mp-14132	-3.69717	-3.74465
mp-13094	-0.679042	-0.64792
mp-1343	-0.356274	-0.311484
mp-676013	-1.48863	-1.4681
mp-21079	-0.687299	-0.657706
mp-504678	-1.24089	-1.26659
mp-675509	-1.90777	-1.8324
mp-10856	-0.440975	-0.442705
mp-754903	-3.13455	-3.17668
mp-770048	-2.33776	-2.39406
mp-3183	-0.796668	-0.806365
mp-7973	-2.89567	-2.91066
mp-698365	-1.14529	-1.12549
mp-556303	-1.38504	-1.37721
mp-510085	-0.80623	-0.817597
mp-29070	-1.71008	-1.69218
mp-761698	-1.61071	-1.47326
mp-972471	0.0206627	0.0164184
mp-769919	-1.74626	-1.72619
mp-16481	-0.522965	-0.495379
mp-757652	-1.2899	-1.29348
mp-39770	-2.62499	-2.64877
mp-29151	-1.28668	-1.29272
mp-755260	-2.34762	-2.37808
mp-767352	-2.08953	-2.09562
mp-985829	-1.83986	-2.02498
mp-866690	-1.55131	-1.57487
mp-1018792	-2.05722	-2.05262
mp-541201	-1.90954	-1.9321
mp-771665	-1.79211	-1.76746
mp-556908	-2.84598	-2.88274
mp-541629	-3.52618	-3.54038
mp-32332	-2.05849	-2.06741
mp-27971	-2.9412	-2.92415
mp-760729	-2.68121	-2.69107
mp-565930	-2.94075	-2.98645
mp-767641	-3.12752	-3.13917
mp-4194	-1.14869	-1.1302
mp-743528	-0.965098	-0.92972
mp-774369	-2.36484	-2.38234
mp-643941	-2.64576	-2.67748
mp-764729	-2.35282	-2.35336
mp-18690	-4.29651	-4.25956
mp-13944	-0.932682	-0.975172
mp-4835	-0.617996	-0.618667
mp-764013	-2.32046	-2.29723
mp-861734	-0.630001	-0.532274
mp-755445	-2.29337	-2.3076
mp-530800	-3.79892	-3.80421
mp-570138	-0.629302	-0.63566
mp-571144	-1.41841	-1.38945
mp-851039	-2.18661	-2.19522
mp-1017447	-1.29677	-1.19421
mp-974335	-0.012203	0.0516604
mp-36052	-1.95502	-1.91481
mp-866613	-2.88118	-2.90443
mp-777710	-2.95211	-2.94913
mp-4789	-2.49884	-2.49462
mp-16956	-3.06385	-3.09305
mp-25582	-2.14537	-2.11821
mp-735520	-2.23667	-2.17523
mp-2981	-2.39974	-2.41835
mp-998610	-1.00298	-0.998707
mp-636225	-2.57097	-2.58873
mp-546321	-2.72511	-2.78241
mp-31803	-1.71928	-1.78906
mp-569410	-1.07542	-1.06083
mp-25590	-2.32126	-2.31325
mp-560	-0.88279	-0.886879
mp-763959	-2.03929	-1.96981
mp-773069	-3.50164	-3.51718
mp-764651	-2.34733	-2.24104
mp-763123	-2.21053	-2.20994
mp-1018819	-0.345863	-0.333201
mp-645	-1.58725	-1.61374
mp-9753	-3.27676	-3.21312
mp-505572	-0.100559	-0.182748
mp-571163	-0.342965	-0.30057
mp-31692	-2.33797	-2.3836
mp-754555	-2.74355	-2.74623
mp-866936	-1.36568	-1.2758
mp-977562	-0.647795	-0.642555
mp-9195	-2.15643	-2.12828
mp-5175	-1.91602	-1.99865
mp-542915	-0.395018	-0.39565
mp-972912	0.00194333	0.0164407
mp-766387	-3.34449	-3.39478
mp-566150	-2.15713	-2.17557
mp-756460	-1.75882	-1.756
mp-600941	-1.80603	-1.80614
mp-695887	-2.34054	-2.34197
mp-743846	-1.96139	-1.97152
mp-771634	-2.23497	-2.18983
mp-1020010	-0.823768	-0.667974
mp-777151	-2.77558	-2.79869
mp-653823	-1.10356	-1.08108
mp-866015	-0.306636	-0.300274
mp-31380	-0.83038	-0.857663
mp-705454	-0.968291	-0.939996
mp-771338	-3.16635	-3.18492
mp-19827	-1.07162	-1.01913
mp-626496	-2.10397	-2.11519
mp-565301	-2.48359	-2.49142
mp-1013987	-1.89944	-1.85904
mp-973265	1.01107	0.979361
mp-556525	-2.98107	-2.99229
mp-763638	-2.52857	-2.51072
mp-567334	-0.987382	-0.943461
mp-19123	-2.37681	-2.37332
mp-756930	-3.06499	-3.02721
mp-32642	-2.37141	-2.38484
mp-8886	-0.346553	-0.286966
mp-8121	-0.644301	-0.641907
mp-7880	-0.343828	-0.297163
mp-999083	-0.139769	-0.0851141
mp-768030	-2.19992	-2.20702
mp-774377	-2.49305	-2.49833
mp-572271	-2.60637	-2.60154
mp-773049	-2.84226	-2.78198
mp-6628	-1.17597	-1.15654
mp-6712	-2.87944	-2.92222
mp-28122	-2.45293	-2.49643
mp-27258	-0.0840918	-0.111137
mp-568539	-0.712785	-0.740007
mp-673247	-3.89126	-3.282
mp-24914	-2.40446	-2.55912
mp-972600	-2.305	-2.36911
mp-569813	-0.3165	-0.306107
mp-557626	-3.81291	-3.84651
mp-504670	-0.578341	-0.570122
mp-767929	-2.81016	-2.84544
mp-547521	-2.56019	-2.5733
mp-778757	-1.46685	-1.53221
mp-761324	-2.29611	-2.17831
mp-999208	-0.535262	-0.27982
mp-2576	-0.483995	-0.537811
mp-961651	-0.540025	-0.537984
mp-17709	-2.48023	-2.49903
mp-560226	-3.27368	-3.30497
mp-735519	-3.0237	-2.96034
mp-19987	-0.679253	-0.529589
mp-19219	-2.45652	-2.51786
mp-775082	-1.88062	-1.96331
mp-6127	-3.01651	-3.02931
mp-20205	-2.19551	-2.24867
mp-553990	-1.34085	-1.47471
mp-767427	-2.35238	-2.3628
mp-757514	-2.46646	-2.47806
mp-770941	-2.31223	-2.33915
mp-776713	-2.4585	-2.4777
mp-759544	-1.48998	-1.48584
mp-1990	-0.479914	-0.627894
mp-764361	-2.87993	-2.91527
mp-756009	-1.16691	-1.131
mp-775732	-1.95081	-1.93241
mp-766905	-2.94533	-2.97328
mp-849394	-2.65594	-2.70276
mp-19731	-0.563007	-0.558396
mp-25696	-1.99153	-2.01099
mp-10394	-0.0395167	-0.0853586
mp-764737	-2.66147	-2.65701
mp-560601	-1.95003	-1.96493
mp-1827	-0.409012	-0.416697
mp-855	-0.00184405	-0.00908811
mp-13302	-0.758273	-0.75088
mp-777707	-2.36401	-2.37815
mp-771203	-2.29928	-2.3305
mp-566991	-2.68255	-2.70253
mp-850500	-2.42056	-2.44903
mp-9277	-1.4982	-1.45403
mp-570930	-0.480446	-0.45791
mp-22618	-2.08386	-2.07925
mp-9545	-0.300426	-0.272344
mp-23598	-1.62663	-1.62701
mp-540838	-2.29075	-2.28438
mp-697856	-2.84106	-2.86845
mp-582767	-1.94891	-1.95079
mp-763363	-2.43018	-2.41286
mp-763099	-2.50153	-2.61982
mp-5221	-0.61565	-0.574396
mp-782818	-2.6641	-2.68105
mp-769729	-1.81312	-1.81963
mp-558740	-1.81944	-1.82275
mp-10343	-0.563816	-0.570954
mp-540208	-2.50865	-2.51441
mp-4964	-1.12433	-1.2181
mp-10428	-0.121047	-0.127014
mp-23801	-1.57212	-1.54426
mp-1019549	-3.26243	-3.31827
mp-36234	-1.35803	-1.41923
mp-11037	-0.424072	-0.423699
mp-565886	-2.08781	-2.11185
mp-766163	-2.2449	-2.25515
mp-3726	-0.690127	-0.664063
mp-761590	-2.2199	-2.21555
mp-560223	-1.99134	-1.99278
mp-561902	-0.631096	-0.60929
mp-30594	-0.0639593	-0.0709785
mp-18747	-2.47973	-2.5984
mp-540855	-0.515241	-0.487168
mp-1786	-0.303331	-0.350936
mp-767906	-2.51654	-2.51677
mp-863377	-2.52115	-2.50568
mp-1253	-1.97093	-2.04812
mp-13541	-3.06593	-3.20695
mp-30537	-2.82589	-2.84645
mp-20689	-0.635977	-0.625187
mp-779854	-2.49184	-2.50764
mp-764053	-2.87659	-2.88332
mp-568545	-0.357461	-0.339521
mp-866972	-1.57852	-1.58516
mp-977559	-0.77706	-0.771115
mp-567957	-0.427072	-0.363653
mp-16234	-0.423231	-0.436696
mp-998241	-2.55475	-2.52583
mp-765818	-1.38295	-1.36551
mp-35539	-0.559838	-0.507664
mp-973920	-3.21566	-2.70645
mp-7221	-0.580434	-0.502653
mp-770155	-2.56981	-2.58987
mp-556137	-3.28137	-3.32326
mp-866660	-0.578146	-0.563121
mp-19284	-0.658438	-0.678842
mp-774093	-2.3515	-2.38051
mp-769626	-2.41531	-2.34808
mp-2719	-0.574882	-0.600036
mp-632402	-3.84499	-3.83365
mp-4487	-0.483133	-0.469877
mp-12533	-4.02751	-4.06599
mp-978695	-0.993706	-0.956034
mp-27607	-0.266746	-0.263756
mp-763082	-1.95687	-1.95325
mp-10347	-3.31097	-3.34397
mp-650178	-1.01834	-1.02288
mp-21628	-0.209667	-0.220456
mp-569161	-1.3727	-1.37352
mp-864734	-0.682109	-0.693325
mp-28489	-0.917269	-0.913228
mp-765828	-1.97218	-2.01819
mp-2954	-0.586989	-0.552481
mp-778794	-2.15199	-2.13877
mp-27834	-1.22731	-1.17224
mp-777056	-2.47265	-2.49643
mp-973109	-0.719539	-0.652368
mp-505807	-0.210736	-0.174995
mp-11571	-0.458853	-0.417
mp-755512	-3.66395	-3.70535
mp-565583	-3.32235	-3.3432
mp-765139	-2.60464	-2.61313
mp-567722	-1.31459	-1.35908
mp-1008926	-0.148294	0.11738
mp-34296	-1.81659	-1.84749
mp-39888	-2.52406	-2.56123
mp-763557	-2.3207	-2.34849
mp-771994	-1.14168	-1.14188
mp-625548	-1.45007	-1.38475
mp-541168	-2.9243	-2.94154
mp-775402	-1.10387	-1.10413
mp-225	-0.286904	-0.262028
mp-567597	0.060039	0.0608161
mp-779269	-2.63657	-2.6443
mp-1007918	-0.900911	-0.88611
mp-12286	-3.48835	-3.52504
mp-764834	-1.63487	-1.595
mp-567248	-0.42782	-0.426533
mp-13378	-0.725034	-0.731765
mp-1018083	-0.203161	-0.138448
mp-24091	-1.92972	-1.87713
mp-680944	-3.01546	-3.05792
mp-6027	-1.81052	-1.79943
mp-755446	-2.06932	-2.08322
mp-1719	-1.51025	-1.43797
mp-743873	-2.80356	-2.84009
mp-763584	-2.37447	-2.36917
mp-29096	-0.523814	-0.510661
mp-28085	-2.63161	-2.65038
mp-721943	-1.87909	-1.86346
mp-763827	-2.55812	-2.51672
mp-27779	-1.27744	-1.2826
mp-20151	-0.418457	-0.423065
mp-705514	-0.704855	-0.699689
mp-704198	-2.45231	-2.46078
mp-775778	-2.79888	-2.82173
mp-674352	-0.551644	-0.513402
mp-505815	-1.58099	-1.59091
mp-762382	-2.50868	-2.4708
mp-771423	-2.1932	-2.2299
mp-35889	-1.34626	-0.962437
mp-973633	-0.801104	-0.793301
mp-676349	-0.495768	-0.504218
mp-1675	-0.755106	-0.780842
mp-771904	-2.23127	-2.18298
mp-27064	-2.20793	-2.20195
mp-765853	-2.83854	-2.87432
mp-19833	-0.749651	-0.762356
mp-698728	-1.87693	-1.67302
mp-4555	-2.19059	-2.2537
mp-556489	-3.00718	-3.00893
mp-776091	-3.06699	-3.05387
mp-762693	-2.31643	-2.29778
mp-20906	-0.336064	-0.328218
mp-778071	-4.26378	-4.28986
mp-557844	-2.98886	-3.02867
mp-972272	-0.71094	-0.719312
mp-16599	-2.8368	-2.86104
mp-761254	-2.51082	-2.52173
mp-636105	-0.0755393	-0.0944834
mp-542220	-0.286001	-0.231446
mp-10895	-0.298361	-0.314064
mp-557989	-2.0179	-1.99551
mp-674366	-2.80544	-2.7599
mp-505139	-2.2783	-2.27604
mp-685168	-3.49044	-3.45669
mp-775116	-2.51278	-2.53751
mp-865848	-0.337298	-0.331109
mp-510374	-1.48365	-1.53677
mp-978853	-0.657323	-0.643284
mp-2619	0.0438926	0.0217654
mp-4041	-0.399593	-0.434275
mp-19865	-0.495363	-0.421764
mp-774048	-2.53377	-2.57743
mp-540440	-2.26895	-2.26473
mp-779798	-2.22593	-2.21937
mp-1527	-0.247892	-0.265265
mp-771872	-2.05807	-2.0451
mp-3777	-1.25051	-1.317
mp-10950	-2.86321	-2.90205
mp-173	-0.226312	-0.170753
mp-767701	-2.48012	-2.49518
mp-1017982	0.847975	0.724664
mp-776049	-2.44096	-2.45794
mp-999540	-0.422124	-0.360264
mp-780147	-2.56733	-2.5836
mp-24044	-1.52408	-1.47803
mp-554475	-3.24483	-3.22354
mp-771064	-2.4107	-2.42112
mp-567401	-0.558284	-0.477354
mp-13536	-0.474019	-0.452167
mp-776001	-2.46784	-2.49086
mp-11666	-0.43099	-0.417969
mp-1002124	-0.309081	-0.301016
mp-755018	-3.06423	-2.99488
mp-775647	-2.08125	-2.09353
mp-765454	-2.43644	-2.45746
mp-975216	-2.24219	-1.99623
mp-738629	-1.6231	-1.60061
mp-19416	-3.05572	-3.08159
mp-555717	-2.54522	-2.48859
mp-997008	-0.87846	-0.78539
mp-705332	-2.36402	-2.37873
mp-765969	-2.23664	-2.21963
mp-989565	-2.81947	-2.84648
mp-7499	-0.759659	-0.761783
mp-776115	-2.12949	-2.27762
mp-771213	-2.60034	-2.61471
mp-555884	-2.04023	-2.01171
mp-999068	-0.180977	-0.104204
mp-570403	-0.285987	-0.288576
mp-637201	-2.31579	-2.30952
mp-755543	-3.01457	-3.04937
mp-12778	-0.334547	-0.236019
mp-971826	0.198368	0.418425
mp-972510	-0.879379	-0.838612
mp-558056	-3.10277	-3.13195
mp-7109	-1.0102	-0.978247
mp-31347	-0.757626	-0.748688
mp-777495	-2.6605	-2.68228
mp-6565	-3.13474	-3.14154
mp-669326	-0.612197	-0.590579
mp-697111	-1.39892	-1.39311
mp-770171	-2.6715	-2.67795
mp-559614	-2.57544	-2.58026
mp-770702	-2.51061	-2.48582
mp-6507	-2.57248	-2.59241
mp-3797	-1.17727	-1.20624
mp-41734	-3.01202	-3.04934
mp-514	-0.175208	-0.209845
mp-771534	-2.26134	-2.23196
mp-630820	-0.524387	-0.551392
mp-649033	-0.788544	-0.802948
mp-763439	-3.15817	-3.21476
mp-25017	-2.6639	-2.66693
mp-7792	-2.36279	-2.38762
mp-30717	-0.272102	-0.271518
mp-672273	-1.70771	-1.69703
mp-773165	-1.5067	-1.51543
mp-772258	-2.63737	-2.66265
mp-12689	-0.895253	-0.881788
mp-5476	-3.42227	-3.43877
mp-36252	-1.66074	-1.63606
mp-684024	-1.22287	-1.1172
mp-972117	-2.40955	-2.39754
mp-542675	-1.38931	-1.40836
mp-25405	-2.15583	-2.16944
mp-642804	-2.06859	-2.04478
mp-25485	-1.9412	-1.89699
mp-752666	-1.84337	-1.86232
mp-770337	-2.29126	-2.28957
mp-849685	-1.38272	-1.39787
mp-4865	-0.70001	-0.675743
mp-12146	-3.59416	-3.5408
mp-2250	-0.44926	-0.410028
mp-557035	-2.53685	-2.51345
mp-774121	-2.42506	-2.45749
mp-951	-0.754899	-0.72387
mp-19249	-1.99669	-1.89331
mp-753823	-4.20819	-4.27608
mp-640859	-1.86738	-1.85859
mp-759735	-2.53156	-2.5395
mp-622491	-1.3266	-1.38085
mp-705002	-2.6483	-2.64186
mp-771353	-2.54549	-2.54738
mp-643564	-1.86053	-1.85004
mp-557450	-1.48937	-1.5076
mp-15551	-0.426995	-0.443354
mp-550579	-2.71838	-2.78952
mp-569486	-0.264758	-0.30103
mp-25612	-2.24319	-2.26058
mp-15362	-3.08826	-3.10673
mp-541753	-1.10829	-1.11602
mp-1739	-0.688777	-0.678929
mp-8540	-0.430408	-0.27694
mp-764812	-2.83784	-2.85309
mp-32373	-2.30269	-2.31725
mp-763490	-2.83044	-2.82378
mp-755010	-2.52962	-2.33608
mp-680671	-0.0631704	-0.126834
mp-29375	-1.21039	-1.25999
mp-17677	-3.0072	-3.03215
mp-754540	-1.17332	-1.15979
mp-27980	-3.21289	-3.69074
mp-12631	-2.42973	-2.4782
mp-7664	-1.59997	-1.55411
mp-18612	-1.27486	-1.32518
mp-780115	-2.59454	-2.57509
mp-774309	-2.64707	-2.66814
mp-775125	-2.5407	-2.52831
mp-767081	-2.04595	-2.08357
mp-759381	-2.44659	-2.49725
mp-772610	-2.07838	-2.02314
mp-767355	-2.11993	-2.1273
mp-753802	-3.67072	-3.74836
mp-769813	-2.45226	-2.52218
mp-16622	-0.52353	-0.520827
mp-4066	-2.18796	-2.20812
mp-868564	-1.90461	-1.83682
mp-542926	-2.97883	-3.03926
mp-24131	-0.700878	-0.68858
mp-10889	-0.181341	-0.189959
mp-763718	-2.74702	-2.78433
mp-763057	-1.35525	-1.34112
mp-539	-1.04232	-1.06193
mp-623088	-3.4131	-3.491
mp-773242	-2.28429	-2.28526
mp-761563	-1.85465	-1.86439
mp-15438	-2.48602	-2.50117
mp-573498	-0.382905	-0.374516
mp-24589	-1.58249	-1.67592
mp-1019525	-3.01443	-3.03527
mp-12108	-0.477833	-0.554891
mp-973981	-3.11915	-3.19012
mp-767900	-2.65391	-2.6557
mp-17434	-3.76068	-3.75999
mp-21901	-0.35441	-0.331894
mp-996962	-0.771321	-1.12127
mp-557019	-2.45413	-2.43655
mp-540832	-2.51729	-2.53692
mp-32884	-0.287158	-0.274491
mp-705083	-2.04153	-2.05901
mp-559955	-1.92736	-1.88759
mp-754833	-2.45911	-2.47828
mp-14015	-0.00617068	-0.00680364
mp-24831	-1.46584	-1.46768
mp-582389	-0.401461	-0.393237
mp-675751	-3.38499	-3.42308
mp-559610	-2.92261	-2.94084
mp-19956	-2.8614	-2.8843
mp-23261	-0.700855	-0.776406
mp-556339	-0.996908	-1.07482
mp-14763	-1.03655	-1.03127
mp-604459	-2.34596	-2.3652
mp-567141	-1.75625	-1.71915
mp-775022	-2.15348	-2.34325
mp-774714	-2.50856	-2.54145
mp-505702	-1.70487	-1.74066
mp-764713	-2.48481	-2.51933
mp-19581	-2.93445	-2.9772
mp-776038	-2.87848	-2.85779
mp-782053	-2.81162	-2.84282
mp-753524	-2.00327	-2.04685
mp-7638	-3.21535	-3.27709
mp-865427	-2.67649	-2.80347
mp-19496	-2.26449	-2.2598
mp-763436	-2.18065	-2.19953
mp-998988	-0.319741	-0.18946
mp-775753	-2.45445	-2.49628
mp-16988	-1.10731	-1.11091
mp-726	-1.1169	-1.17175
mp-672223	-1.71637	-1.49168
mp-29806	-0.829905	-0.786987
mp-767621	-2.42171	-2.44998
mp-16356	-0.621626	-0.676291
mp-773719	-1.81124	-1.82409
mp-771986	-1.8409	-1.81072
mp-961650	0.0946018	0.375707
mp-542879	-0.315399	-0.308265
mp-864889	-0.28518	-0.280297
mp-24151	-0.78197	-0.786642
mp-755920	-3.06767	-3.08338
mp-759790	0.0753457	0.0635746
mp-24927	-1.89381	-2.02131
mp-779689	-0.561499	-0.519317
mp-554227	-2.47681	-2.51165
mp-764455	-2.26367	-2.25039
mp-758841	-1.8834	-1.88294
mp-555005	-2.79665	-2.81611
mp-36699	-3.84924	-3.92881
mp-756452	-3.86052	-3.88214
mp-775715	-2.10837	-2.10363
mp-775628	-2.75331	-2.74695
mp-762264	-2.50422	-2.45993
mp-28708	-2.41038	-2.31753
mp-694892	-2.87367	-2.90915
mp-735589	-2.73306	-2.75693
mp-371	-0.224972	-0.245337
mp-5380	-1.80532	-1.77922
mp-557748	-1.95101	-1.9451
mp-677217	-1.21491	-1.12622
mp-557668	-2.21797	-2.21819
mp-764943	-2.32062	-2.30856
mp-773247	-1.61857	-1.58985
mp-961666	-0.434252	0.392545
mp-780123	-2.40975	-2.4194
mp-770667	-2.24365	-2.23869
mp-776184	-2.10554	-2.10644
mp-866117	-0.406666	-0.436073
mp-950217	-0.463896	-0.262991
mp-771668	-2.44886	-2.36435
mp-759198	-2.4363	-2.45054
mp-972914	-0.344221	-0.361647
mp-849474	-1.78747	-1.75013
mp-867215	-0.42696	-0.438382
mp-1016106	-0.0844967	-0.0598072
mp-1013749	-2.56124	-2.50095
mp-761298	-2.56953	-2.62018
mp-30159	-1.25635	-1.30983
mp-767576	-2.17948	-2.2044
mp-867895	-0.215011	-0.23035
mp-1019596	-3.55484	-3.85023
mp-10892	-0.631723	-0.641227
mp-762279	-3.33212	-3.3948
mp-757173	-1.76648	-1.79511
mp-26377	-2.5656	-2.60082
mp-767041	-1.98174	-1.96128
mp-863066	-2.82981	-2.92125
mp-764215	-2.13794	-2.17004
mp-771622	-2.37027	-2.35515
mp-2281	-1.22553	-1.17602
mp-1638	-0.289985	-0.253989
mp-1018123	-0.410679	-0.424428
mp-17897	-3.13497	-3.15562
mp-772245	-1.67059	-1.6489
mp-27999	-0.397378	-0.359449
mp-779518	-2.76094	-2.7957
mp-971859	0.775915	0.628398
mp-7961	-1.61062	-1.6605
mp-541837	-0.370238	-0.383905
mp-763386	-2.48926	-2.45314
mp-631331	0.647515	0.646559
mp-28997	-0.683041	-0.653244
mp-644280	-0.394175	-0.479617
mp-557134	-3.24432	-3.20326
mp-752733	-2.70102	-2.67403
mp-21684	-0.481543	-0.528644
mp-771235	-3.39792	-3.43062
mp-27600	-2.27422	-2.25414
mp-761816	-1.44578	-1.44954
mp-19932	-0.418003	-0.417443
mp-850372	-2.46323	-2.46616
mp-25625	-2.21141	-2.20502
mp-1529	-0.978088	-0.99507
mp-764494	-2.72047	-2.73818
mp-27140	-2.00854	-1.9956
mp-556674	-2.56298	-2.57787
mp-14243	-1.53516	-1.53755
mp-18373	-1.39515	-1.38901
mp-566592	-2.2921	-2.31751
mp-984717	-0.296941	-0.146492
mp-13042	-3.16678	-3.18553
mp-474	-0.125599	-0.12359
mp-765708	-3.00884	-3.0481
mp-769799	-1.69789	-1.6592
mp-754790	-2.66861	-2.69277
mp-7226	-0.00293205	-0.155972
mp-765886	-1.51185	-1.57207
mp-762973	-2.60816	-2.6217
mp-762247	-2.37306	-2.32692
mp-569428	-0.0865145	-0.0441288
mp-31036	-0.181476	-0.201757
mp-554918	-3.46842	-3.53276
mp-542933	-0.183573	-0.18077
mp-1180	-0.259042	-0.361485
mp-16826	-0.943071	-0.968191
mp-1008	0.186475	0.222986
mp-771303	-2.51938	-2.51434
mp-766777	-2.52009	-2.54054
mp-740719	-1.88416	-1.89679
mp-17777	-2.80593	-2.87481
mp-762724	-2.58662	-2.58764
mp-778709	-2.31837	-2.31768
mp-864981	-0.62729	-0.608547
mp-556975	-1.90989	-1.94135
mp-1008752	-1.31634	-1.23602
mp-763242	-2.74007	-2.75676
mp-765364	-2.28105	-2.27406
mp-853140	-2.5266	-2.53291
mp-30119	-1.98513	-2.0229
mp-721347	-2.36393	-2.32399
mp-762819	-2.03245	-2.02226
mp-542078	-0.969896	-0.905477
mp-782641	-2.16581	-2.14366
mp-771068	-2.33282	-2.38347
mp-851007	-2.07472	-2.01189
mp-3216	-1.33796	-1.25735
mp-11644	-0.0118498	-0.0132917
mp-707285	-1.17196	-1.14401
mp-977586	-0.319461	-0.29159
mp-770330	-2.60055	-2.56235
mp-866500	-1.97502	-1.96948
mp-757806	-2.51263	-2.51423
mp-580748	-0.583439	-0.561984
mp-23583	-1.87441	-1.79592
mp-765381	-2.71263	-2.70368
mp-977438	-0.520126	-0.544975
mp-626193	-2.34718	-2.30418
mp-30251	-2.52145	-2.58907
mp-765595	-2.45545	-2.43395
mp-30473	-0.499892	-0.512028
mp-555147	-3.24998	-3.19887
mp-975397	0.147129	0.150797
mp-776061	-2.81492	-2.85543
mp-18163	-0.527095	-0.506945
mp-28320	-0.169235	-0.161132
mp-29724	-0.264003	-0.271804
mp-763081	-2.19911	-2.21483
mp-766360	-2.45571	-2.46763
mp-558724	-2.06809	-2.07919
mp-767695	-2.86035	-2.86855
mp-565656	-2.80764	-2.8189
mp-974221	-0.307109	-0.31249
mp-23944	-1.20596	-1.2935
mp-754246	-2.65618	-2.77485
mp-20643	-2.58601	-2.59595
mp-16504	-0.562541	-0.544962
mp-603327	-1.25323	-1.32544
mp-560535	-2.93184	-2.92747
mp-704836	-3.17226	-2.42593
mp-30278	-0.943206	-0.944731
mp-764218	-2.76914	-2.79359
mp-4993	-0.857503	-0.843626
mp-772348	-2.05307	-2.00438
mp-540940	-0.601102	-0.675402
mp-770968	-2.15738	-2.19274
mp-4438	-2.59443	-2.68626
mp-35929	-2.06232	-2.09912
mp-603609	-1.46637	-1.4447
mp-767716	-2.97553	-2.98677
mp-556592	-0.763311	-0.740221
mp-754408	-1.72508	-1.71481
mp-7073	-2.05363	-2.047
mp-30479	-0.513449	-0.383578
mp-754202	-1.29816	-1.28421
mp-2617	-0.222522	-0.256562
mp-690684	-1.92146	-1.92039
mp-778325	-2.67954	-2.71725
mp-763359	-1.88452	-1.87541
mp-686947	-2.70441	-2.71839
mp-15178	-0.278581	-0.323484
mp-556262	-3.24275	-3.27436
mp-571662	-0.908332	-0.856627
mp-567278	-1.38158	-1.31597
mp-7263	-1.012	-0.847944
mp-550893	-3.10251	-3.95507
mp-776357	-2.82379	-2.78531
mp-23552	-1.48814	-1.50995
mp-770311	-2.48948	-2.5655
mp-997013	-0.418816	-0.413127
mp-27987	-1.12053	-1.34642
mp-2183	-1.59887	-1.54774
mp-647818	-2.30028	-2.2355
mp-23152	0.060039	0
mp-764981	-2.85758	-2.8711
mp-8966	-0.727041	-0.727442
mp-631303	0.803171	0.658559
mp-29221	-4.06156	-4.10995
mp-675472	-3.0804	-3.13316
mp-510486	-0.431703	-0.576628
mp-865002	-0.610469	-0.59911
mp-917	-0.016341	0.0155134
mp-12233	-2.66411	-2.70541
mp-540966	-0.625332	-0.607716
mp-30771	-0.452603	-0.442064
mp-16035	-3.09374	-3.21566
mp-569952	-1.69386	-1.73534
mp-989594	-0.223851	-0.198605
mp-698600	-2.05471	-2.03603
mp-771902	-2.51764	-2.55595
mp-771616	-2.13153	-2.15789
mp-505186	-1.3687	-1.31827
mp-30335	-0.126629	-0.166394
mp-27227	-0.781826	-0.822067
mp-1275	-0.305801	-0.297078
mp-759673	-2.50086	-2.51391
mp-21466	-2.53548	-2.53846
mp-24095	-0.716168	-0.705954
mp-546621	-2.36928	-2.37188
mp-18164	-2.33723	-2.3265
mp-554766	-1.85873	-1.82005
mp-763952	-2.12985	-2.12615
mp-36529	-2.17335	-2.19985
mp-631387	0.475977	0.594772
mp-778920	-2.4803	-2.49329
mp-504795	-2.25344	-2.27152
mp-17649	-2.45533	-2.49733
mp-776273	-2.28079	-2.28854
mp-600016	-3.25678	-3.27827
mp-9522	-1.48561	-1.4827
mp-778706	-2.26713	-2.26704
mp-765457	-2.97549	-3.02781
mp-20337	-2.57594	-2.8661
mp-775327	-2.42601	-2.45039
mp-780479	-2.44301	-2.43235
mp-8638	-0.0016287	0.0694062
mp-773726	-2.37546	-2.39107
mp-767296	-2.65738	-2.64693
mp-32113	-2.40357	-2.41636
mp-781698	-1.44785	-1.48443
mp-768510	-2.60687	-2.65725
mp-12563	-0.770282	-0.576455
mp-977439	-0.319894	-0.245266
mp-11690	-0.5164	-0.537903
mp-1018732	-1.15638	-1.12701
mp-30343	-0.0878022	-0.0403464
mp-772013	-2.50972	-2.53504
mp-777942	-0.423301	-0.377971
mp-676643	-2.06615	-1.87487
mp-25057	-2.20124	-2.2046
mp-782009	-1.99371	-1.94776
mp-27840	-0.483092	-0.496141
mp-977239	0.450277	0.418103
mp-635	-0.543017	-0.616035
mp-542452	-1.25297	-1.25556
mp-768486	-1.89687	-1.91616
mp-781607	-2.40004	-2.41157
mp-569849	-0.214963	-0.233378
mp-770032	-2.19525	-2.23596
mp-765498	-2.9069	-2.92065
mp-541938	-0.504921	-0.543869
mp-13938	-3.01714	-3.0294
mp-774	-0.0881438	-0.109745
mp-8116	-1.13426	-1.07707
mp-696878	-2.69368	-2.75292
mp-21222	-0.740568	-0.73332
mp-765930	-1.97644	-1.95551
mp-866150	-0.140282	-0.140969
mp-772006	-2.32066	-2.41097
mp-541062	-1.02436	-1.01535
mp-760255	-2.56673	-2.61672
mp-680472	-0.763814	-0.76488
mp-763333	-2.655	-2.65753
[truncated: 7,275 more rows]

## Sheet: agg2
name	prediction	target
mp-849675	-2.47805	-2.48929
mp-756392	-2.61382	-2.6252
mp-775445	-1.73636	-1.73387
mp-27760	-0.617633	-0.600461
mp-975368	-0.0438436	-0.0305083
mp-733637	-1.38913	-1.4027
mp-10782	-1.70263	-1.72873
mp-23165	-0.311697	-0.261028
mp-762258	-2.06834	-2.06247
mp-29245	-0.271697	-0.310339
mp-763857	-2.7058	-2.71288
mp-16167	-0.635118	-0.618756
mp-9767	-0.817157	-0.826163
mp-27792	-2.04014	-2.03579
mp-764830	-2.81303	-2.84299
mp-752514	-1.72586	-1.73031
mp-626568	-2.09253	-2.07843
mp-504742	-0.300074	-0.31157
mp-16821	-2.57134	-2.57902
mp-3591	-0.712812	-0.706972
mp-11254	-0.766874	-0.764235
mp-775484	-3.47813	-3.48541
mp-973951	-0.646621	-0.650351
mp-863884	-3.03613	-3.03994
mp-685281	-2.02638	-2.00176
mp-638590	-0.199286	-0.192915
mp-1239	-0.325595	-0.340251
mp-570900	-0.230221	-0.222707
mp-12570	-0.254862	-0.249034
mp-776082	-3.30338	-3.27921
mp-558458	-3.38447	-3.4364
mp-28073	-2.65072	-2.68688
mp-19580	-2.82476	-2.85983
mp-699558	-2.39888	-2.38528
mp-755794	-2.29736	-2.2543
mp-851027	-2.07246	-2.07686
mp-9071	-0.51964	-0.522414
mp-505543	-0.667957	-0.650078
mp-568942	-0.48002	-0.478589
mp-5091	-0.424662	-0.426156
mp-625915	-2.26732	-2.22364
mp-753414	-2.48315	-2.51505
mp-769039	-3.03143	-3.04128
mp-984716	-2.61509	-2.61721
mp-568350	-1.99189	-1.99225
mp-28040	-0.353791	-0.295251
mp-35421	-2.52186	-2.55403
mp-775965	-2.25574	-2.24512
mp-975857	0.193857	0.15189
mp-772231	-2.01635	-1.98945
mp-690526	-1.92226	-1.85189
mp-556135	-2.04853	-2.0429
mp-754010	-1.10826	-1.13948
mp-770231	-2.14853	-2.14464
mp-677138	-2.51737	-2.4992
mp-763011	-2.90879	-2.91686
mp-30311	-0.871274	-0.865423
mp-30460	-0.663459	-0.670611
mp-865866	-0.894903	-0.876126
mp-19575	-1.81073	-1.82213
mp-505270	-2.64023	-2.64802
mp-753656	-2.13963	-2.12354
mp-770097	-1.71879	-1.75978
mp-763320	-2.88883	-2.88322
mp-1009792	0.392273	0.453408
mp-20846	-0.41586	-0.436858
mp-4187	-0.854194	-0.834142
mp-771645	-1.66681	-1.6658
mp-1244	-0.497459	-0.486424
mp-556627	-1.36203	-1.35875
mp-763530	-2.60791	-2.62342
mp-762879	-2.33317	-2.33973
mp-556385	-1.30632	-1.33609
mp-265	-0.633483	-0.684115
mp-773763	-2.11985	-2.03267
mp-541177	-3.26698	-3.26282
mp-764366	-1.30754	-1.27938
mp-690978	-3.37481	-3.38091
mp-676456	-3.53532	-3.55713
mp-760385	0.000905335	0.0935748
mp-24337	-1.77689	-1.84461
mp-17902	-1.76221	-1.7291
mp-698480	-1.76528	-1.78595
mp-978939	0.0566635	0.0579219
mp-687152	-1.45426	-1.44051
mp-769271	-3.43524	-3.44928
mp-31589	-2.09009	-2.1284
mp-1008556	-1.16137	-1.11474
mp-12843	-1.69584	-1.70781
mp-754933	-2.67819	-2.63871
mp-8597	-0.599337	-0.575035
mp-8919	-1.22156	-1.27549
mp-723175	-2.23203	-2.22406
mp-1020616	-2.94049	-2.92406
mp-766176	-2.56318	-2.53597
mp-780483	-2.46674	-2.47012
mp-7094	-1.69809	-1.73344
mp-556717	-1.20129	-1.18401
mp-776618	-2.41421	-2.42733
mp-541140	-0.626813	-0.640536
mp-779925	-2.554	-2.57264
mp-778698	-1.78189	-1.76375
mp-676780	-0.354967	-0.442569
mp-21401	-0.926801	-0.924938
mp-540540	-2.32053	-2.24174
mp-780204	-2.28135	-2.28816
mp-30644	-0.373795	-0.456467
mp-558967	-1.323	-1.31006
mp-2914	-0.841094	-0.857201
mp-556661	-3.26364	-3.31249
mp-767031	-3.1087	-3.1117
mp-542839	-0.080111	-0.0940199
mp-754322	-2.23404	-2.20209
mp-771568	-1.61081	-1.58031
mp-695843	-1.02982	-0.936894
mp-764125	-2.59866	-2.60254
mp-707218	-2.8018	-2.7709
mp-19329	-2.6141	-2.61103
mp-11055	-0.300377	-0.298511
mp-18819	-2.11436	-2.12639
mp-643656	-0.518134	-0.502864
mp-762530	-2.45357	-2.46718
mp-771456	-1.70287	-1.74178
mp-982662	-3.3081	-3.36321
mp-29784	-1.1182	-1.1103
mp-530294	-3.97238	-3.86265
mp-977551	-0.0432987	-0.0501918
mp-555958	-2.92526	-2.87713
mp-555443	-2.06466	-2.06981
mp-771988	-2.24103	-2.23499
mp-767147	-2.50039	-2.5158
mp-4454	-0.493566	-0.487294
mp-505299	-2.62566	-2.60365
mp-567258	-0.378709	-0.365376
mp-11971	-0.899581	-0.91126
mp-18629	-2.89933	-2.91587
mp-776323	-2.25627	-2.25094
mp-1029	-2.94126	-4.18139
mp-763065	-2.17694	-2.24214
mp-601817	-0.201509	-0.0648166
mp-25906	-2.43655	-2.40022
mp-4805	-3.53698	-3.56403
mp-774586	-2.74288	-2.7757
mp-776922	-1.10457	-1.1178
mp-1011260	-2.45957	-2.52754
mp-779766	-1.64261	-1.62086
mp-560387	-3.02124	-3.01307
mp-777912	-2.25812	-2.26018
mp-867177	-0.410385	-0.412057
mp-10489	-0.957624	-0.9637
mp-20108	-0.441085	-0.426986
mp-555151	-1.14608	-1.13992
mp-541735	-1.45139	-1.44029
mp-770014	-2.65351	-2.66526
mp-998147	-1.12824	-1.04573
mp-755751	-4.28163	-4.30487
mp-19178	-0.991098	-1.04962
mp-849514	-2.40206	-2.41029
mp-776733	-3.16636	-3.18002
mp-542164	-1.09721	-1.13185
mp-32324	-2.2339	-2.28247
mp-4122	-2.59946	-2.60255
mp-781082	-2.57824	-2.59185
mp-2489	-0.166187	-0.122809
mp-685606	-1.77939	-1.86446
mp-778276	-2.39517	-2.39227
mp-25755	-2.58634	-2.58724
mp-1156	-0.215284	-0.162561
mp-772195	-3.69005	-3.71911
mp-693753	-3.193	-3.2263
mp-5116	-2.05474	-2.04949
mp-767707	-2.59342	-2.62373
mp-530449	-2.7273	-2.72421
mp-33753	-2.78318	-2.70247
mp-769118	-3.12713	-3.10103
mp-4952	-0.31473	-0.319297
mp-770633	-2.27751	-2.28268
mp-15239	-2.91658	-2.92506
mp-569568	-0.56248	-0.570784
mp-777469	-2.40302	-2.45259
mp-761598	-2.78718	-2.78302
mp-510264	-2.6626	-2.68275
mp-622213	-0.748291	-0.757307
mp-667305	-2.0331	-1.95264
mp-3352	-0.98663	-0.994166
mp-972185	0.0150977	0.0210676
mp-18019	-2.97425	-2.99736
mp-556544	-3.20655	-3.2073
mp-18332	-2.08275	-2.07353
mp-556665	-0.760417	-0.747303
mp-866536	-0.515126	-0.29905
mp-34326	-1.13474	-1.10935
mp-9486	-3.47796	-3.53349
mp-7924	-0.179558	-0.181283
mp-27272	-1.54837	-1.52523
mp-999550	-0.0382342	0.0597964
mp-631451	0.36145	0.776139
mp-705333	-2.51302	-2.51892
mp-9775	-0.873438	-0.870939
mp-768015	-1.79647	-1.81265
mp-756118	-3.82634	-3.86239
mp-27775	-2.5077	-2.57197
mp-568782	-0.607072	-0.644146
mp-850481	-2.1375	-2.14208
mp-865878	-0.411575	-0.478647
mp-19732	-1.13298	-1.11639
mp-761431	-2.63067	-2.64819
mp-19114	-2.54709	-2.55958
mp-10003	-0.294855	-0.343186
mp-853199	-2.25135	-2.24662
mp-21900	-1.02975	-1.04914
mp-977579	-0.645207	-0.608965
mp-774223	-1.46674	-1.49264
mp-763701	-2.70279	-2.72469
mp-767810	-2.06969	-2.05511
mp-23326	-2.82308	-2.89005
mp-590	-0.388073	-0.288202
mp-2971	-0.139922	-0.175389
mp-33737	-1.48741	-1.50745
mp-11299	0.0326075	0.00955682
mp-654225	-1.66203	-1.63794
mp-540431	-2.39487	-2.44058
mp-778590	-2.11223	-2.12783
mp-573721	-0.435594	-0.457054
mp-410	-1.03544	-1.08973
mp-24436	-2.16425	-2.1623
mp-558672	-2.70638	-2.73033
mp-771786	-1.28437	-1.3276
mp-771071	-2.36749	-2.38276
mp-23386	-0.626132	-0.617232
mp-672689	-0.671914	-0.686017
mp-19508	-3.1797	-3.19031
mp-11554	-1.08733	-0.911937
mp-1018715	0.04643	0.0326237
mp-1008524	-0.69564	-0.302315
mp-13053	-0.459599	-0.461893
mp-763155	-1.71756	-1.71033
mp-756018	-2.91548	-2.91557
mp-637255	-0.305044	-0.307103
mp-770341	-2.55946	-2.56805
mp-764801	-2.06316	-2.07998
mp-16996	-2.7181	-2.70517
mp-31094	-0.725952	-0.693188
mp-780288	-2.25943	-2.23972
mp-690607	-1.24202	-1.25683
mp-20485	-0.489376	-0.511518
mp-5942	-0.983886	-0.930315
mp-570680	-0.864553	-0.871055
mp-11113	-0.672997	-0.690918
mp-4955	-0.419738	-0.416416
mp-768490	-1.94696	-1.99771
mp-763681	-2.00853	-2.00154
mp-625184	-2.17833	-2.18863
mp-30776	-0.0419961	-0.0379159
mp-773925	-2.26998	-2.28127
mp-510564	-0.441097	-0.45033
mp-23013	-2.82328	-2.88363
mp-641191	-2.50487	-2.50626
mp-695515	-3.1489	-3.15227
mp-17660	-1.52314	-1.53735
mp-764286	-2.80448	-2.81315
mp-777911	-2.26543	-2.26791
mp-625652	-1.22187	-1.21091
mp-21014	-0.886614	-0.877852
mp-761814	-2.35956	-2.35259
mp-773081	-2.98876	-2.98814
mp-631549	0.92829	1.27574
mp-767801	-2.36468	-2.36273
mp-566053	-2.25808	-2.27118
mp-771502	-1.89136	-1.89467
mp-976061	-0.334324	-0.371094
mp-744644	-1.5386	-1.5424
mp-770855	-2.42973	-2.43768
mp-764274	-2.67415	-2.72263
mp-771184	-2.06274	-2.03501
mp-566895	-1.69002	-1.70817
mp-33056	1.25336	2.21162
mp-767165	-1.51602	-1.49478
mp-862940	-0.792045	-0.79715
mp-866152	-0.593378	-0.429901
mp-2038	-2.39219	-2.39543
mp-775705	-2.38146	-2.38053
mp-28945	-0.206698	-0.268966
mp-7555	-0.560776	-0.58664
mp-761745	-1.35243	-1.32497
mp-24657	-2.06498	-2.08503
mp-5022	-0.928588	-0.912224
mp-754095	-2.17104	-2.15345
mp-763930	-1.99036	-1.97231
mp-762980	-2.44261	-2.44678
mp-763115	-1.91186	-1.91551
mp-766341	-1.86684	-1.89634
mp-866134	-0.170308	-0.128009
mp-771795	-1.80914	-1.83249
mp-672979	-2.52168	-2.54481
mp-761392	-2.54917	-2.56061
mp-1270	-2.45155	-2.47208
mp-557604	-3.13074	-3.13285
mp-621131	-0.0940429	0.102095
mp-641945	-0.681746	-0.65507
mp-763978	-2.67909	-2.70604
mp-25154	-2.6535	-2.6623
mp-11436	-0.439281	-0.404651
mp-28357	-2.18133	-2.35904
mp-32425	-2.62291	-2.64098
mp-567391	-1.93902	-1.89736
mp-776435	-2.97092	-3.053
mp-556341	-1.47292	-1.48904
mp-6478	-2.7825	-2.7785
mp-764000	-2.60831	-2.62374
mp-540164	-2.23176	-2.19715
mp-767099	-2.41295	-2.42165
mp-541026	-3.26775	-3.25584
mp-772829	-2.77133	-2.74245
mp-769290	-2.15885	-2.15171
mp-541747	-1.92865	-1.95255
mp-861951	-0.547051	-0.558884
mp-32024	-2.55621	-2.55229
mp-778458	-1.9775	-1.96669
mp-23465	-1.69475	-1.70763
mp-12467	-0.999952	-0.988132
mp-8059	-3.28909	-3.28438
mp-766153	-2.12663	-2.11343
mp-556822	-2.38525	-2.39046
mp-20774	-0.588146	-0.588355
mp-569806	-0.859808	-0.870017
mp-569251	-0.662583	-0.645795
mp-13801	-1.03827	-1.16962
mp-543029	-1.48402	-1.53443
mp-743715	-1.4965	-1.25653
mp-775660	-2.23339	-2.22558
mp-769569	-1.34597	-1.35441
mp-756073	-2.66444	-2.69708
mp-769399	-3.42141	-3.41865
mp-8290	-3.39149	-3.41837
mp-973738	-1.02047	-1.03017
mp-570400	-0.216683	-0.230958
mp-558628	-2.47619	-2.47562
mp-17812	-3.22045	-3.23489
mp-22958	-1.28461	-1.06521
mp-1006368	-1.40135	-1.34876
mp-14115	-1.59829	-1.57429
mp-972220	-0.874549	-0.848065
mp-777678	-2.79886	-2.82329
mp-29827	-0.417729	-0.389177
mp-776752	-2.45799	-2.46302
mp-25043	-2.00639	-1.99731
mp-766842	-2.90797	-2.95396
mp-10410	-1.96852	-1.97817
mp-819	-0.0224811	-0.114793
mp-561428	-1.74558	-1.67783
mp-14556	-2.90906	-2.91364
mp-776496	-3.20687	-3.1893
mp-558777	-2.67599	-2.66739
mp-849986	-2.71071	-2.71922
mp-5024	-3.10436	-3.13045
mp-559607	-2.78919	-2.80401
mp-769697	-1.08421	-1.00735
mp-996966	-1.01158	-1.01736
mp-778274	-3.73268	-3.72514
mp-770316	-2.56471	-2.56576
mp-645135	-2.80457	-2.80442
mp-1002063	-0.997294	-0.753884
mp-767625	-3.14926	-3.17452
mp-759117	-2.50855	-2.51897
mp-849373	-2.47385	-2.47681
mp-23285	-0.805939	-0.782108
mp-13911	-0.329716	-0.314264
mp-18748	-1.38168	-1.42094
mp-579278	-2.19434	-2.20391
mp-11526	-0.352316	-0.340105
mp-565704	-2.48978	-2.51659
mp-753973	-2.48125	-2.49265
mp-780809	-1.39579	-1.36089
mp-771709	-2.46457	-2.48114
mp-21611	-2.65454	-2.63812
mp-13819	-2.06085	-2.13609
mp-19083	-2.36805	-2.39313
mp-765270	-2.50832	-2.51292
mp-1187	-0.860306	-0.816256
mp-15746	-0.42948	-0.493901
mp-569895	-2.48144	-2.26357
mp-631308	0.646118	0.538691
mp-764088	-2.70378	-2.67113
mp-23626	-1.39408	-1.41096
mp-557203	-3.63322	-3.62928
mp-865402	-0.488367	-0.467329
mp-720212	-3.10267	-3.08908
mp-11225	-0.394084	-0.416154
mp-21810	-0.77702	-0.784689
mp-4264	-2.14732	-2.14661
mp-18257	0.0770098	0.0768913
mp-6698	-3.14361	-3.18978
mp-743769	-3.05419	-2.97352
mp-557319	-1.40065	-1.4129
mp-775272	-2.34377	-2.36218
mp-753795	-1.87328	-1.87957
mp-9619	-0.624554	-0.658193
mp-760440	-3.63484	-3.64611
mp-763690	-1.74184	-1.71398
mp-570539	-0.353873	-0.35744
mp-569120	-0.872403	-0.839691
mp-27474	-1.36492	-1.44114
mp-780003	-3.15765	-3.16282
mp-743716	-3.35043	-3.35418
mp-865	-0.367309	-0.409068
mp-32054	-2.45487	-2.44022
mp-561196	-1.13978	-1.13989
mp-29022	-0.798531	-0.754287
mp-19156	-2.45265	-2.47745
mp-777974	-2.33596	-2.34325
mp-772573	-2.42923	-2.47473
mp-767608	-2.64814	-2.65491
mp-27384	-0.750617	-0.733316
mp-764210	-2.36651	-2.37117
mp-774395	-2.14625	-2.13472
mp-2468	-0.477962	-0.478854
mp-4564	-2.81679	-2.82543
mp-22850	-1.0593	-0.982917
mp-10973	-0.795309	-0.808157
mp-20971	-0.328536	-0.385301
mp-767711	-2.89783	-2.90771
mp-567325	-0.550525	-0.552628
mp-774178	-1.53127	-1.50925
mp-1014230	-0.282887	-0.186359
mp-765682	-2.39621	-2.38348
mp-773988	-2.40487	-2.42329
mp-22687	-0.331637	-0.343731
mp-850920	-2.38234	-2.39927
mp-570691	-0.295001	-0.259667
mp-2178	-0.586939	-0.614032
mp-1019578	-1.30601	-1.32372
mp-865798	-0.0675654	-0.0984462
mp-706235	-2.54392	-2.57106
mp-541047	-0.786927	-0.803694
mp-684496	-2.3096	-2.26644
mp-863726	-0.774589	-0.747986
mp-556767	-1.0298	-1.11361
mp-675546	-0.160766	-0.177063
mp-570683	-0.357606	-0.362842
mp-849667	-1.65966	-1.69834
mp-756632	-3.13117	-3.14258
mp-29811	-1.05679	-0.980605
mp-634767	-2.43513	-2.4261
mp-1008642	0.32552	0.537247
mp-764267	-2.9443	-2.96537
mp-695984	-2.26999	-2.29882
mp-540424	-2.46178	-2.46447
mp-12463	-0.319915	-0.318521
mp-971673	-0.716802	-0.701125
mp-12789	-0.292855	-0.305394
mp-631527	1.01058	0.929526
mp-623814	-0.633926	-0.627279
mp-556804	-3.24	-3.25045
mp-21027	-0.652129	-0.687536
mp-5528	-0.578948	-0.568055
mp-565616	-3.12705	-3.04199
mp-571664	-0.630688	-0.556204
mp-558870	-2.33554	-2.31231
mp-772744	-3.13945	-3.15869
mp-762598	-2.50038	-2.49639
mp-773389	-2.54199	-2.53524
mp-20587	-2.42471	-2.47463
mp-976583	0.726745	0.80431
mp-9983	-0.743187	-0.733783
mp-10194	-1.14026	-1.20915
mp-780207	-2.03535	-2.0461
mp-767883	-2.24213	-2.24583
mp-616641	-1.1554	-1.16159
mp-6686	-2.9988	-3.01274
mp-38284	-3.75521	-3.81051
mp-767659	-1.99473	-1.98763
mp-181	-0.13433	-0.166578
mp-5766	-1.69482	-1.67376
mp-767334	-2.60662	-2.63077
mp-21872	-3.91939	-3.93567
mp-31677	-2.40099	-2.43971
mp-4156	-3.03198	-3.05764
mp-18246	-0.9579	-0.917323
mp-770595	-2.0358	-2.17994
mp-639160	-0.723109	-0.716932
mp-1020029	-1.68662	-1.4525
mp-27167	-2.02565	-2.06654
mp-8216	-3.51734	-3.54292
mp-6580	-2.5908	-2.59236
mp-759933	-2.45629	-2.48354
mp-445	-0.0418224	-0.0253077
mp-767872	-2.6652	-2.673
mp-504106	-2.6874	-2.66001
mp-560001	-3.06874	-3.0765
mp-540000	-1.09254	-1.07697
mp-696655	-1.92873	-1.91832
mp-777499	-2.29972	-2.33692
mp-557724	-2.475	-2.5446
mp-17888	-3.87004	-3.88518
mp-556778	-3.19452	-3.16271
mp-19513	-2.3194	-2.34714
mp-21141	-0.0922356	-0.0806651
mp-767432	-2.96233	-2.99222
mp-540545	-1.32889	-1.30446
mp-19255	-2.44368	-2.45091
mp-759882	-0.838752	-0.88883
mp-31954	-2.46524	-2.47847
mp-765664	-2.37846	-2.3685
mp-8673	-2.00071	-2.0232
mp-676489	-1.24167	-1.27074
mp-734123	-2.2955	-2.30758
mp-761626	-1.6818	-1.70727
mp-647606	-0.461995	-0.461929
mp-8388	-2.51936	-2.55437
mp-754556	-1.0283	-0.984499
mp-568184	-0.490181	-0.50184
mp-722913	-0.747649	-0.772141
mp-669521	-2.19385	-2.20395
mp-853141	-2.37996	-2.39032
mp-613172	-2.14969	-2.16371
mp-571258	-0.968724	-0.905045
mp-971928	0.0816373	0.13751
mp-1005689	-0.175445	-0.220253
mp-29580	-0.970909	-0.988954
mp-540260	-2.61645	-2.6267
mp-25662	-1.39099	-1.27813
mp-979981	-0.473736	-0.463714
mp-771916	-1.62651	-1.60275
mp-2534	-0.863534	-0.355646
mp-556932	-2.20956	-2.2658
mp-17260	-0.289282	-0.323288
mp-12657	-0.407341	-0.44338
mp-23742	-2.19893	-2.18904
mp-703515	-2.28311	-2.31154
mp-764732	-2.11081	-2.10772
mp-35530	-1.91307	-1.92348
mp-978962	0.72748	0.869938
mp-566864	-3.02845	-3.06372
mp-30177	-0.230287	-0.216686
mp-12780	-0.584203	-0.596314
mp-976876	-0.0343326	-0.0890637
mp-22846	-0.720443	-0.655458
mp-11412	-0.577102	-0.562035
mp-567602	-0.756943	-0.757196
mp-22479	-1.21239	-1.259
mp-764572	-2.45066	-2.44401
mp-25024	-2.73431	-2.74493
mp-697020	-2.60985	-2.66467
mp-997048	-0.204766	-0.202641
mp-570661	-0.539265	-0.580556
mp-19065	-3.70124	-3.73809
mp-862316	-0.626159	-0.691561
mp-555485	-3.14114	-3.14768
mp-32415	-2.63078	-2.63789
mp-2050	-1.05145	-1.11145
mp-557483	-3.44894	-3.75679
mp-558933	-2.15112	-2.15163
mp-772001	-2.30635	-2.30148
mp-570046	-1.06218	-1.11228
mp-772355	-1.26088	-1.25313
mp-769629	-2.60435	-2.60603
mp-760825	-1.77893	-1.82064
mp-780864	-2.05542	-2.06233
mp-761701	-1.48036	-1.47308
mp-8758	-0.373646	-0.298069
mp-631498	1.04132	1.32147
mp-863664	-0.463069	-0.46756
mp-1346	-0.906949	-0.810032
mp-6563	-0.379292	-0.397508
mp-31011	-0.99517	-0.979309
mp-1019279	-0.516862	-0.522685
mp-1007821	-0.153633	-0.102056
mp-770612	-1.71269	-1.67931
mp-775987	-2.73756	-2.76698
mp-568864	-1.7299	-1.71468
mp-26409	-2.72632	-2.75763
mp-763913	-2.34333	-2.35377
mp-565869	-2.76267	-2.7446
mp-760492	-1.36706	-1.42825
mp-867309	-0.696143	-0.702332
mp-566629	-2.4841	-2.49712
mp-558055	-0.800123	-0.842602
mp-27210	-2.50488	-2.51177
mp-2795	-1.29188	-0.807515
mp-631471	0.41705	0.881497
mp-31857	-3.03944	-3.08761
mp-853193	-2.39574	-2.39131
mp-2215	-0.240928	-0.264453
mp-862365	-0.724891	-0.700211
mp-540355	-2.37022	-2.38191
mp-755678	-1.50251	-1.483
mp-763762	-0.831927	-0.883261
mp-11165	-2.95568	-2.93822
mp-7108	-1.00591	-1.00176
mp-562394	-2.97715	-2.96735
mp-25545	-1.77497	-1.77863
mp-566771	-1.69734	-1.70349
mp-9055	-2.90614	-2.90183
mp-762915	-1.13148	-1.17021
mp-757673	-2.81796	-2.84442
mp-758350	-2.42771	-2.42282
mp-770347	-2.31174	-2.36409
mp-572442	-1.49903	-1.46813
mp-27703	-1.54912	-1.50281
mp-38170	-0.561076	-0.3735
mp-504570	-1.70538	-1.72705
mp-757541	-2.51212	-2.47125
mp-557320	-1.7646	-1.74436
mp-1435	-0.217516	-0.217984
mp-1020144	-3.14171	-2.89828
mp-540900	-2.20808	-2.2288
mp-775177	-2.023	-2.02157
mp-781767	-1.60001	-1.582
mp-683616	-2.95909	-2.97269
mp-675766	-1.4166	-1.33338
mp-685138	-0.869614	-0.86335
mp-774472	-2.92383	-2.98816
mp-558610	-2.55923	-2.54262
mp-757924	-1.24147	-1.24029
mp-561207	-2.82985	-2.80242
mp-36890	-2.11551	-2.09273
mp-12275	-0.543386	-0.563515
mp-552089	-1.84518	-1.85337
mp-999390	0.397396	0.0924871
mp-754369	-1.79731	-1.77655
mp-32431	-2.63092	-2.63811
mp-23138	-1.6814	-1.7225
mp-4896	-1.03402	-1.03895
mp-694945	-2.43901	-2.51644
mp-767151	-2.24601	-2.24303
mp-774964	-2.63217	-2.63943
mp-862364	-0.861378	-0.85278
mp-753946	-1.02702	-1.07558
mp-763897	-2.88953	-2.88025
mp-7104	-3.45473	-3.7408
mp-669471	-0.448331	-0.437769
mp-767985	-2.42175	-2.43194
mp-2513	-0.468009	-0.525295
mp-10378	-0.311115	-0.304957
mp-757840	-2.08046	-2.09028
mp-19230	-2.08188	-2.0733
mp-868647	-2.25892	-2.14147
mp-8812	-3.02727	-3.05475
mp-743583	-2.63159	-2.65102
mp-9757	-3.02513	-3.02671
mp-555575	-0.428319	-0.486324
mp-11769	-0.736072	-0.71967
mp-773887	-2.37449	-2.37286
mp-4527	-2.13209	-2.15691
mp-974613	-0.21992	-0.282547
mp-767245	-3.26162	-3.29284
mp-23909	-0.793605	-0.731694
mp-29210	-0.296275	-0.300512
mp-754960	-2.86771	-2.86986
mp-13456	-1.12473	-1.13868
mp-976828	0.00388592	-0.0112481
mp-984744	-0.294009	-0.2171
mp-561486	-2.99183	-2.98143
mp-23358	-0.793769	-0.760903
mp-31509	-0.477997	-0.413727
mp-2011	-0.949917	-0.96182
mp-19377	-3.09201	-3.11828
mp-18433	-3.65852	-3.68655
mp-555077	-2.03704	-2.06591
mp-22961	-1.93395	-1.85812
mp-27630	-1.35459	-1.56091
mp-8578	-0.736381	-0.668775
mp-778460	-2.60738	-2.56605
mp-777563	-1.03372	-0.950287
mp-1157	-0.335738	-0.337525
mp-766143	-3.11788	-3.13722
mp-776010	-2.33901	-2.34735
mp-865536	-0.764223	-0.765938
mp-557892	-1.29896	-1.289
mp-12368	-1.88653	-1.97987
mp-524	-0.446381	-0.463169
mp-29398	-1.21257	-1.26244
mp-39995	-2.63498	-2.37536
mp-7748	-2.87334	-2.88152
mp-20506	-0.419544	-0.439259
mp-504752	-2.12111	-2.12617
mp-11550	-0.971322	-0.981719
mp-4748	-2.81289	-2.83352
mp-686909	-3.05377	-3.06447
mp-27413	-0.511072	-0.483916
mp-15826	-0.758778	-0.759634
mp-645272	-1.86168	-1.88286
mp-762358	-1.93509	-1.93838
mp-579560	-1.1725	-1.20704
mp-762906	-1.72348	-1.73903
mp-20948	-0.759582	-0.728945
mp-557071	-1.70517	-1.71938
mp-39140	-2.99665	-2.98129
mp-865527	-0.446145	-0.436769
mp-764510	-2.20765	-2.22038
mp-3612	-2.50765	-2.53832
mp-22146	-0.522235	-0.528303
mp-41109	-3.32764	-3.34508
mp-762249	-1.95021	-1.9607
mp-26541	-2.51226	-2.50834
mp-763997	-2.41316	-2.4258
mp-1640	-0.280666	-0.303145
mp-24799	-0.588432	-0.585337
mp-566764	-1.94912	-1.96174
mp-862360	-0.796608	-0.797742
mp-15704	-1.25591	-1.41395
mp-600051	-3.28203	-3.27468
mp-769980	-2.56824	-2.56585
mp-775782	-1.95619	-1.94089
mp-767035	-3.58024	-3.60429
mp-768335	-1.05106	-1.05929
mp-764618	-2.33887	-2.35714
mp-1002081	-1.71614	-1.71813
mp-4016	-0.998186	-0.970155
mp-761395	-2.52115	-2.52608
mp-540467	-2.24628	-2.23877
mp-626851	-1.5098	-1.45359
mp-776761	-2.20921	-2.20468
mp-32537	-1.64199	-1.65467
mp-776233	-2.01849	-2.03692
mp-15795	-1.68349	-1.69644
mp-21104	-0.33115	-0.379508
mp-581834	-0.598262	-0.607681
mp-14430	-2.85537	-2.86718
mp-556210	-1.77473	-1.80202
mp-1006399	-0.335356	-0.331883
mp-12879	-0.980761	-0.983964
mp-4537	-0.810534	-0.806933
mp-763550	-2.53819	-2.54592
mp-866658	-0.88336	-0.903468
mp-989584	-1.4455	-1.34904
mp-763163	-1.44748	-1.44037
mp-3151	-2.84807	-2.86878
mp-6046	-2.42834	-2.43693
mp-25003	-3.25481	-3.27547
mp-4875	-3.68917	-3.71663
mp-743780	-3.10771	-3.12228
mp-558273	-3.36463	-3.40877
mp-542678	-1.92064	-1.92315
mp-566470	-2.57141	-2.58086
mp-1020666	-2.02628	-2.13936
mp-773060	-3.47891	-3.50464
mp-23033	-1.60754	-1.66868
mp-971804	-0.163813	-0.111993
mp-19037	-2.29959	-2.29324
mp-780172	-3.06139	-3.07076
mp-780103	-2.01359	-2.0178
mp-29008	-1.5649	-1.54104
mp-850149	-3.03903	-3.04902
mp-17679	-2.84188	-2.83615
mp-1018141	0.0571545	0.179805
mp-771354	-2.68387	-2.67449
mp-32509	-2.54538	-2.55792
mp-998153	-0.835466	-0.681621
mp-1959	-3.08619	-3.62801
mp-698032	-0.421505	-0.344918
mp-850494	-1.85922	-1.83372
mp-850075	-2.45807	-2.45312
mp-862802	-1.52516	-1.50235
mp-676400	-1.17296	-0.860039
mp-765679	-1.1474	-1.14528
mp-638749	-0.428039	-0.389921
mp-771900	-2.34525	-2.34919
mp-22925	-0.293605	-0.284537
mp-19116	-2.96346	-2.97324
mp-571474	-0.790476	-0.743529
mp-2987	-0.186902	-0.19247
mp-24399	-1.713	-1.69815
mp-32465	-2.55955	-2.57237
mp-551283	-1.50062	-1.50048
mp-765991	-2.62181	-2.6193
mp-20642	0.011578	0.0557791
mp-559091	-3.14251	-3.28498
mp-31572	-2.27397	-2.27261
mp-30640	-0.0269327	-0.0282485
mp-11118	-1.34713	-1.36231
mp-30814	-0.465148	-0.379071
mp-974846	1.42335	1.43579
mp-780749	-1.83715	-1.83775
mp-569577	-0.588752	-0.568041
mp-541435	-1.98853	-1.96625
mp-468	-3.68542	-3.88983
mp-765814	-1.32321	-1.31564
mp-19820	-0.214757	-0.213064
mp-30419	-0.227422	-0.151851
mp-12762	-0.463622	-0.483353
mp-770345	-2.60491	-2.6014
mp-1523	-0.944969	-0.962951
mp-32061	-2.91519	-2.86373
mp-764796	-2.33818	-2.34822
mp-18474	-0.114937	-0.154308
mp-761661	-1.71481	-1.72383
mp-777554	-1.86437	-1.80585
mp-21440	-0.305265	-0.265577
mp-765042	-2.48336	-2.48969
mp-760062	-3.20349	-3.20637
mp-780553	-2.43479	-2.41988
mp-761768	-2.95527	-2.93827
mp-1013691	-0.837443	-0.839781
mp-35015	-0.673316	-0.694158
mp-754502	-2.87293	-3.20797
mp-769511	-2.39175	-2.40344
mp-642157	-1.63152	-1.57384
mp-541688	-0.888878	-0.875815
mp-15391	-1.90006	-1.89058
mp-9956	-0.113326	-0.179931
mp-775391	-2.76134	-2.76814
mp-861978	-0.710387	-0.743532
mp-542598	-0.206904	-0.196792
mp-754658	-1.34853	-1.34304
mp-978287	0.293802	0.313294
mp-768500	-1.94252	-1.90935
mp-556009	-1.59393	-1.58933
mp-767533	-2.75676	-2.77512
mp-21002	-0.656093	-0.656784
mp-978102	-0.723929	-0.725905
mp-773906	-2.71867	-2.70126
mp-997043	-0.987585	-0.973641
mp-31134	-0.825533	-0.837848
mp-776445	-2.10385	-2.12136
mp-6820	-1.64573	-1.59524
mp-22903	-1.3988	-1.49083
mp-10481	-0.408873	-0.387829
mp-17706	-0.813632	-0.799466
mp-861665	-0.327336	-0.35831
mp-772916	-1.62447	-1.58935
mp-765554	-1.20156	-1.19376
mp-644292	-0.530303	-0.504548
mp-25526	-2.32751	-2.33104
mp-12571	-0.494086	-0.658853
mp-778713	-1.07752	-1.03872
mp-10615	-1.11354	-0.876298
mp-686908	-2.68675	-2.69475
mp-9467	-3.29416	-3.29781
mp-776731	-2.3525	-2.35186
mp-31648	-2.63148	-2.64151
mp-684031	-0.150059	-0.157976
mp-3427	-3.09774	-3.09947
mp-779985	-1.88394	-1.83107
mp-559151	-3.48345	-3.51221
mp-9953	-1.31645	-1.29846
mp-556171	-1.84224	-1.83748
mp-776649	-1.92264	-1.92709
mp-42508	-2.98597	-2.97454
mp-775983	-2.27354	-2.26804
mp-667342	-1.60972	-1.61117
mp-763382	-2.48025	-2.47799
mp-556085	-1.5907	-1.59115
mp-704703	-2.53963	-2.54894
mp-772232	-3.19279	-3.19971
mp-5503	-3.74286	-3.76299
mp-568449	-0.692295	-0.666793
mp-2721	-3.68434	-3.74137
mp-774014	-1.71919	-1.68919
mp-567486	-1.08942	-1.08514
mp-764567	-2.32703	-2.332
mp-555860	-3.2681	-3.20647
mp-29976	-1.26613	-1.22855
mp-975906	-0.058746	-0.0738083
mp-4917	-2.856	-2.85979
mp-560671	-3.16081	-3.0977
mp-29206	-0.480701	-0.448299
mp-756086	-1.29827	-1.26772
mp-566762	-2.13634	-2.13635
mp-754596	-2.06797	-2.05766
mp-752709	-2.02832	-2.05203
mp-707343	-1.46995	-1.43551
mp-37906	-0.768074	-0.764865
mp-25759	-2.0883	-2.09248
mp-753171	-2.54293	-2.5784
mp-7976	-2.96027	-2.98586
mp-28127	-0.920525	-0.963882
mp-22052	-0.979458	-0.988395
mp-979074	-2.33828	-2.01805
mp-763543	-2.4564	-2.47654
mp-773699	-1.76294	-1.78929
mp-9880	-0.518457	-0.521753
mp-2541	-0.357609	-0.381945
mp-776187	-2.26621	-2.29091
mp-31992	-2.55491	-2.55627
mp-510728	-0.29663	-0.305756
mp-705457	-3.37685	-3.35005
mp-11356	-0.591217	-0.57042
mp-558984	-2.06358	-2.08236
mp-567975	-1.40739	-1.44352
mp-12160	-2.83448	-2.83939
mp-772296	-1.69395	-1.70024
mp-765843	-2.26233	-2.27316
mp-672966	-2.31259	-2.32651
mp-31896	-2.13191	-2.18162
mp-624190	-0.863306	-0.83347
mp-978842	-2.3738	-2.20071
mp-777021	-1.71298	-1.69854
mp-570232	-2.6806	-2.71063
mp-685108	-0.221177	-0.286172
mp-779167	-2.50338	-2.50838
mp-556936	-2.95846	-2.93172
mp-8484	-0.916228	-1.0595
mp-763803	-2.90563	-2.92287
mp-17829	-2.91161	-2.90086
mp-8507	-0.828282	-0.81072
mp-764003	-2.24352	-2.17893
mp-755417	-3.17364	-3.16747
mp-772435	-2.70223	-2.72426
mp-560016	-2.92881	-2.92476
mp-540554	-1.55023	-1.55012
mp-28235	-0.896547	-0.83714
mp-5273	-1.42007	-1.41542
mp-646397	-2.68318	-2.70107
mp-850923	-2.87652	-2.89025
mp-675784	-1.01493	-0.936317
mp-25750	-2.50099	-2.53304
mp-735063	-1.05311	-1.0808
mp-862936	-0.295879	-0.297147
mp-779090	-2.41836	-2.41726
mp-867887	-0.502183	-0.478354
mp-566620	-2.06082	-2.03669
mp-549490	-2.58183	-2.62484
mp-15382	-2.85677	-2.85558
mp-971763	0.246626	0.269093
mp-765555	-2.47604	-2.49012
mp-336	-0.0760492	-0.0897469
mp-22981	-1.09762	-0.987375
mp-1006150	0.846383	0.680847
mp-765787	-2.0354	-2.01556
mp-765240	-2.95267	-2.91645
mp-1019532	-3.39005	-3.44347
mp-505789	-0.84566	-0.867713
mp-10597	-0.00829715	0.00873961
mp-755537	-3.93622	-4.00974
mp-30801	-0.287001	-0.296813
mp-556244	-0.927611	-0.881763
mp-20991	-2.12989	-2.1263
mp-779765	-2.46994	-2.48193
mp-763474	-2.44666	-2.45903
mp-867122	-0.259591	-0.249343
mp-1020022	-2.75565	-2.76378
mp-780522	-2.0161	-2.038
mp-764229	-2.68824	-2.70183
mp-759287	-1.83693	-1.8592
mp-771351	-2.09691	-2.09756
mp-999192	-0.666346	-0.453807
mp-641534	-1.37341	-1.36111
mp-17704	-3.83489	-3.84939
mp-685257	-1.4355	-1.40646
mp-773297	-2.8567	-2.90675
mp-568646	-0.425179	-0.439363
mp-20310	-0.866125	-0.872033
mp-780440	-2.41671	-2.42557
mp-972411	0.122606	0.0939185
mp-558951	-2.61747	-2.63151
mp-541111	-1.66547	-1.68496
mp-9308	-3.47183	-3.54284
mp-19396	-1.8211	-1.80228
mp-25686	-2.4095	-2.42658
mp-975073	-0.632177	-0.637114
mp-774883	-0.758492	-0.819907
mp-850746	-2.30382	-2.32117
mp-853230	-2.21882	-2.2203
mp-862445	-0.500069	-0.554263
mp-626014	-1.06409	-1.03437
mp-19750	-3.02697	-3.02898
mp-8204	-0.10727	-0.168146
mp-849438	-2.4762	-2.48588
mp-1017983	-0.128585	-0.134256
mp-88	0.0154549	0.00848817
mp-541416	-2.52915	-2.5117
mp-759786	-3.35419	-3.34902
mp-541597	-2.68105	-2.78794
mp-680417	-1.42678	-1.41876
mp-978536	-0.482453	-0.470722
mp-555844	-0.921883	-0.956431
mp-557655	-1.79764	-1.81729
mp-684690	-1.68567	-1.67632
mp-541183	-0.636629	-0.602871
mp-777255	-2.31219	-2.3627
mp-776803	-2.82352	-2.85807
mp-744463	-2.45678	-2.4853
mp-866637	-1.02338	-1.02448
mp-777719	-2.78427	-2.80049
mp-17750	-3.2548	-3.23198
mp-753708	-3.33338	-3.44222
mp-28705	-0.592694	-0.619479
mp-853187	-2.69867	-2.72995
mp-555268	-2.48458	-2.50432
mp-772157	-3.00233	-2.99435
mp-762163	-2.47962	-2.48622
mp-752549	-2.0516	-2.18412
mp-6644	-2.83818	-2.8833
mp-753299	-2.14708	-2.12006
mp-863856	-2.1758	-2.1866
mp-770103	-2.76261	-2.76679
mp-556185	-2.76898	-2.78295
mp-767756	-1.99084	-1.98195
mp-764	-0.135484	-0.105673
mp-4950	-3.48685	-3.71906
mp-9799	-1.912	-1.95125
mp-764677	-2.31723	-2.32451
mp-763100	-2.85684	-2.88681
mp-772587	-3.00862	-3.0019
mp-774910	-1.56464	-1.56251
mp-9612	-2.43361	-2.46633
mp-560905	-2.05433	-2.06876
mp-776344	-2.2399	-2.28972
mp-7099	-0.438299	-0.41381
mp-26591	-2.78552	-2.78662
mp-849699	-2.56442	-2.56726
mp-504848	-1.45284	-1.43668
mp-158	-0.00245672	0.0134372
mp-16825	-3.15282	-3.16169
mp-752888	-2.37017	-2.32827
mp-776740	-2.14424	-2.15148
mp-756690	-2.16334	-2.13707
mp-653560	-3.65509	-3.66856
mp-9873	-0.521957	-0.563061
mp-29787	-2.32684	-2.32471
mp-850771	-2.49696	-2.50768
mp-867955	-2.66805	-2.66781
mp-31317	-1.20967	-1.15826
mp-616204	-1.4915	-1.45917
mp-773608	-1.76716	-1.75333
mp-542302	-0.702674	-0.712756
mp-771091	-1.87343	-1.85606
mp-4007	-0.8311	-0.811598
mp-8181	-1.277	-1.13318
mp-864878	-0.545443	-0.537384
mp-769744	-2.2404	-2.2371
mp-510098	-0.431082	-0.410406
mp-30424	-0.153987	-0.153746
mp-14824	-2.0674	-2.08942
mp-695694	-0.620845	-0.65462
mp-21412	-0.0527891	-0.120943
mp-1111	-0.368088	-0.348581
mp-18917	-1.8079	-1.79719
mp-19463	-2.39963	-2.41245
mp-772489	-3.27803	-3.30156
mp-37478	-2.32516	-2.32916
mp-5181	-0.906203	-0.902078
mp-675716	-3.61793	-3.63884
mp-17057	-2.13865	-2.22887
mp-6123	-2.64895	-2.83673
mp-123	0.0199989	0
mp-1534	-2.29393	-2.32719
mp-560466	-2.64009	-2.61978
mp-543108	-1.94894	-1.96114
mp-28855	-2.25214	-2.31899
mp-31849	-2.53119	-2.55074
mp-9634	-1.10271	-1.08201
mp-849354	-2.68846	-2.71358
mp-1136	-0.412979	-0.404565
mp-568430	0.172432	-0.0720945
mp-782697	-1.72023	-1.73996
mp-777669	-2.90697	-2.9201
mp-975933	-0.476858	-0.463699
mp-758571	-3.27866	-3.32737
mp-550086	-2.01102	-1.98609
mp-768292	-2.27598	-2.24548
mp-673669	-2.02936	-2.03146
mp-676210	-1.78784	-1.85708
mp-4596	-2.41051	-2.49514
mp-757149	-3.98315	-3.95762
mp-647822	-0.38425	-0.324565
mp-486	-0.395978	-0.359562
mp-676799	-0.046682	-0.0309895
mp-770850	-2.23742	-2.24265
mp-505113	-2.84467	-2.85639
mp-765768	-2.22889	-2.21809
mp-867267	-0.743725	-0.68195
mp-2121	-0.435636	-0.45129
mp-28950	-0.873449	-0.807568
mp-690799	-0.671188	-0.557423
mp-761676	-1.72756	-1.77836
mp-11456	-1.03955	-1.09667
mp-16684	-1.7229	-1.70771
mp-8581	-0.972364	-0.942397
mp-685995	-2.88978	-2.89504
mp-3719	-1.51643	-1.55504
mp-1009213	0.283263	0.426356
mp-540830	-2.06872	-2.06654
mp-28278	-0.761557	-0.754991
mp-2828	-1.88966	-1.94027
mp-764162	-2.62569	-2.62526
mp-778833	-1.6606	-1.63787
mp-777872	-1.69488	-1.65598
mp-571293	-0.901402	-0.888621
mp-26675	-2.5149	-2.50933
mp-20694	-1.52946	-1.58482
mp-626225	-1.46559	-1.45289
mp-744193	-1.82166	-1.81579
mp-772170	-1.52483	-1.51722
mp-849364	-1.8956	-1.84968
mp-620372	-0.632433	-0.572215
mp-22670	-0.989414	-0.992991
mp-972062	-0.552508	-0.553443
mp-763506	-2.35481	-2.47485
mp-766348	-1.66502	-1.66213
mp-777425	-2.35165	-2.36024
mp-566229	-2.33413	-2.28586
mp-8537	-2.09749	-2.13352
mp-9712	-2.60625	-2.50645
mp-2137	-0.186522	-0.171851
mp-542781	-0.167013	-0.107577
mp-781049	-3.12039	-3.14032
mp-866668	-1.12619	-1.10926
mp-11327	-1.0009	-1.02807
mp-770023	0.108852	0.0747329
mp-754208	-2.92393	-2.96734
mp-569344	-0.813533	-0.804891
mp-697683	-1.08457	-1.03782
mp-8869	-3.00902	-3.02637
mp-559346	-3.01073	-3.01006
mp-12826	-0.00694019	-0.0542691
mp-757981	-1.98738	-2.00405
mp-775565	-2.2432	-2.24113
mp-23283	-0.839498	-0.799964
mp-10298	-1.09016	-1.11142
mp-758223	-1.73447	-1.70014
mp-767747	-2.77066	-2.77765
mp-31832	-2.53101	-2.53535
mp-867821	-0.250348	-0.275247
mp-31312	-0.344681	-0.343178
mp-774387	-3.1165	-3.14004
mp-2883	-2.9979	-3.02116
mp-868321	-2.32628	-2.34181
mp-4547	-3.24833	-3.32071
mp-558318	-3.14943	-3.15834
mp-32791	-0.116813	-0.192303
mp-23958	-1.63746	-1.64693
mp-4878	-1.05974	-1.03454
mp-557012	-3.03417	-2.96656
mp-12022	-2.41323	-2.43193
mp-562920	-3.23274	-3.26255
mp-722316	-1.15713	-1.21355
mp-773354	-1.76859	-1.75163
mp-18150	-3.01341	-3.02519
mp-765191	-1.92298	-1.93931
mp-540447	-2.44132	-2.44615
mp-18071	-1.31836	-1.28574
mp-19323	-3.18189	-3.20972
mp-541595	-0.259326	-0.140807
mp-644246	-0.57682	-0.604483
mp-979910	-0.353176	-0.276682
mp-21835	-0.326372	-0.360017
mp-667372	-3.76328	-3.00954
mp-21278	-0.565652	-0.501667
mp-677222	-3.5648	-3.55994
mp-570425	-0.365795	-0.325307
mp-631302	0.231673	0.675702
mp-770959	-2.82794	-2.84483
mp-28487	-0.030291	-0.0502401
mp-2323	-0.28407	-0.0976105
mp-995226	-0.814027	-0.698682
mp-773030	-2.99308	-2.89963
mp-763441	-1.68585	-1.71533
mp-779072	-2.42094	-2.43988
mp-1017519	1.54081	1.68396
mp-1014212	-0.231362	0.540979
mp-754152	-2.74217	-2.77706
mp-3704	-0.728558	-0.732649
mp-767724	-2.42847	-2.44392
mp-569788	-0.252417	-0.242384
mp-1008376	-0.63313	-0.578496
mp-9318	-1.18575	-1.12221
mp-556374	-2.1995	-2.18629
mp-866216	-0.641499	-0.621118
mp-22089	-1.18778	-1.21283
mp-850292	-1.95478	-1.95399
mp-540704	-2.18157	-2.20124
mp-30171	-0.668098	-0.652603
mp-26312	-2.48437	-2.48161
mp-850277	-1.63777	-1.64545
mp-972439	-2.34026	-2.35095
mp-583234	-0.103309	-0.0870789
mp-25694	-2.61711	-2.63956
mp-1098	-1.13519	-1.17345
mp-568522	-0.473352	-0.479043
mp-510595	-0.724192	-0.70016
mp-15694	-1.07468	-1.06075
mp-759713	-3.26036	-3.26811
mp-976972	-0.275397	-0.271101
mp-775993	-2.56523	-2.57563
mp-20496	-2.06874	-2.08896
mp-31583	-2.51549	-2.52658
mp-761979	-2.37624	-2.34342
mp-755950	-3.53191	-3.52508
mp-685120	-0.79222	-0.817992
mp-32532	-2.18122	-2.19914
mp-754751	-2.59674	-2.60204
mp-1006056	-0.36049	-0.40721
mp-706657	-2.61473	-2.64912
mp-756951	-2.07711	-2.09931
mp-778868	-2.14043	-2.11771
mp-1018067	0.0150452	0.0651748
mp-980052	-0.269765	-0.232755
mp-707311	-1.9717	-1.96403
mp-770901	-2.01559	-2.01925
mp-39387	-3.41351	-3.43349
mp-770335	-2.47577	-2.51119
mp-1018156	-0.0188934	-0.0633892
mp-558083	-3.41067	-3.41294
mp-20799	-0.432483	-0.449442
mp-643458	-2.05702	-2.07214
mp-866171	-0.781524	-0.778966
mp-16794	-0.645262	-0.642238
mp-555296	-3.16073	-3.22683
mp-780091	-1.97399	-1.96691
mp-780007	-1.94337	-1.96479
mp-865795	-0.372337	-0.366506
mp-761493	-1.90712	-1.93038
mp-765777	-2.54852	-2.53643
mp-20599	-0.217852	-0.218012
mp-972486	0.244211	0.233225
mp-1121	-0.298876	-0.279043
mp-652663	-0.854166	-0.821746
mp-705842	-1.62976	-1.59224
mp-769280	-3.41665	-3.42773
mp-770642	-2.49472	-2.47749
mp-8978	-1.26963	-0.924034
mp-5193	-2.21556	-2.17983
mp-9719	-0.561573	-0.632115
mp-771334	-2.19495	-2.18624
mp-565482	-1.88138	-1.8829
mp-765718	-2.2458	-2.26476
mp-769884	-1.733	-1.72124
mp-24006	-1.25881	-1.26633
mp-568936	-0.0348083	-0.0714085
mp-1013706	-0.477449	-0.484128
mp-27523	-1.37362	-1.33924
mp-770680	-2.23137	-2.21097
mp-764627	-2.14403	-2.1328
mp-7564	-0.428877	-0.455811
mp-12360	-0.0688117	-0.0881081
mp-765529	-1.9441	-1.93221
mp-14132	-3.68261	-3.74465
mp-13094	-0.684821	-0.64792
mp-1343	-0.320946	-0.311484
mp-676013	-1.49085	-1.4681
mp-21079	-0.690697	-0.657706
mp-504678	-1.25509	-1.26659
mp-675509	-1.87596	-1.8324
mp-10856	-0.439185	-0.442705
mp-754903	-3.16545	-3.17668
mp-770048	-2.38865	-2.39406
mp-3183	-0.795194	-0.806365
mp-7973	-2.89122	-2.91066
mp-698365	-1.10641	-1.12549
mp-556303	-1.37154	-1.37721
mp-510085	-0.817678	-0.817597
mp-29070	-1.69559	-1.69218
mp-761698	-1.60822	-1.47326
mp-972471	0.0150177	0.0164184
mp-769919	-1.77424	-1.72619
mp-16481	-0.451229	-0.495379
mp-757652	-1.31449	-1.29348
mp-39770	-2.6603	-2.64877
mp-29151	-1.3463	-1.29272
mp-755260	-2.37745	-2.37808
mp-767352	-2.08283	-2.09562
mp-985829	-1.83269	-2.02498
mp-866690	-1.57747	-1.57487
mp-1018792	-2.06643	-2.05262
mp-541201	-1.94048	-1.9321
mp-771665	-1.82266	-1.76746
mp-556908	-2.86691	-2.88274
mp-541629	-3.53873	-3.54038
mp-32332	-2.07573	-2.06741
mp-27971	-2.88869	-2.92415
mp-760729	-2.69437	-2.69107
mp-565930	-2.96193	-2.98645
mp-767641	-3.11516	-3.13917
mp-4194	-1.12703	-1.1302
mp-743528	-0.949379	-0.92972
mp-774369	-2.39099	-2.38234
mp-643941	-2.7216	-2.67748
mp-764729	-2.34959	-2.35336
mp-18690	-4.22265	-4.25956
mp-13944	-0.933436	-0.975172
mp-4835	-0.629945	-0.618667
mp-764013	-2.28942	-2.29723
mp-861734	-0.584353	-0.532274
mp-755445	-2.30452	-2.3076
mp-530800	-3.77372	-3.80421
mp-570138	-0.652277	-0.63566
mp-571144	-1.40329	-1.38945
mp-851039	-2.19721	-2.19522
mp-1017447	-1.31686	-1.19421
mp-974335	-0.00750518	0.0516604
mp-36052	-1.98356	-1.91481
mp-866613	-2.89958	-2.90443
mp-777710	-2.93298	-2.94913
mp-4789	-2.49901	-2.49462
mp-16956	-3.0919	-3.09305
mp-25582	-2.1097	-2.11821
mp-735520	-2.19265	-2.17523
mp-2981	-2.41069	-2.41835
mp-998610	-1.08043	-0.998707
mp-636225	-2.58213	-2.58873
mp-546321	-2.7882	-2.78241
mp-31803	-1.76492	-1.78906
mp-569410	-1.07277	-1.06083
mp-25590	-2.28673	-2.31325
mp-560	-0.882887	-0.886879
mp-763959	-2.02376	-1.96981
mp-773069	-3.50723	-3.51718
mp-764651	-2.33678	-2.24104
mp-763123	-2.20785	-2.20994
mp-1018819	-0.345048	-0.333201
mp-645	-1.59732	-1.61374
mp-9753	-3.23471	-3.21312
mp-505572	-0.169252	-0.182748
mp-571163	-0.330475	-0.30057
mp-31692	-2.34713	-2.3836
mp-754555	-2.75238	-2.74623
mp-866936	-1.28783	-1.2758
mp-977562	-0.639143	-0.642555
mp-9195	-2.11809	-2.12828
mp-5175	-1.96218	-1.99865
mp-542915	-0.369167	-0.39565
mp-972912	0.0344298	0.0164407
mp-766387	-3.35219	-3.39478
mp-566150	-2.16346	-2.17557
mp-756460	-1.80815	-1.756
mp-600941	-1.76983	-1.80614
mp-695887	-2.34726	-2.34197
mp-743846	-1.94863	-1.97152
mp-771634	-2.17861	-2.18983
mp-1020010	-0.973495	-0.667974
mp-777151	-2.77355	-2.79869
mp-653823	-1.08835	-1.08108
mp-866015	-0.296523	-0.300274
mp-31380	-0.837774	-0.857663
mp-705454	-0.916538	-0.939996
mp-771338	-3.17754	-3.18492
mp-19827	-1.06685	-1.01913
mp-626496	-2.1143	-2.11519
mp-565301	-2.45906	-2.49142
mp-1013987	-1.87045	-1.85904
mp-973265	0.677106	0.979361
mp-556525	-2.99107	-2.99229
mp-763638	-2.50601	-2.51072
mp-567334	-0.936648	-0.943461
mp-19123	-2.36863	-2.37332
mp-756930	-3.06138	-3.02721
mp-32642	-2.44452	-2.38484
mp-8886	-0.2041	-0.286966
mp-8121	-0.657659	-0.641907
mp-7880	-0.317013	-0.297163
mp-999083	-0.204143	-0.0851141
mp-768030	-2.20719	-2.20702
mp-774377	-2.49267	-2.49833
mp-572271	-2.62848	-2.60154
mp-773049	-2.84139	-2.78198
mp-6628	-1.15576	-1.15654
mp-6712	-2.91477	-2.92222
mp-28122	-2.44559	-2.49643
mp-27258	-0.0442006	-0.111137
mp-568539	-0.734204	-0.740007
mp-673247	-3.73065	-3.282
mp-24914	-2.27239	-2.55912
mp-972600	-2.36782	-2.36911
mp-569813	-0.297587	-0.306107
mp-557626	-3.82624	-3.84651
mp-504670	-0.570219	-0.570122
mp-767929	-2.83353	-2.84544
mp-547521	-2.56205	-2.5733
mp-778757	-1.50845	-1.53221
mp-761324	-2.19586	-2.17831
mp-999208	-0.560516	-0.27982
mp-2576	-0.537891	-0.537811
mp-961651	-0.614729	-0.537984
mp-17709	-2.51622	-2.49903
mp-560226	-3.30847	-3.30497
mp-735519	-2.97867	-2.96034
mp-19987	-0.619975	-0.529589
mp-19219	-2.46813	-2.51786
mp-775082	-1.92725	-1.96331
mp-6127	-3.01719	-3.02931
mp-20205	-2.17421	-2.24867
mp-553990	-1.49107	-1.47471
mp-767427	-2.35209	-2.3628
mp-757514	-2.48198	-2.47806
mp-770941	-2.32531	-2.33915
mp-776713	-2.4702	-2.4777
mp-759544	-1.51102	-1.48584
mp-1990	-0.575311	-0.627894
mp-764361	-2.8936	-2.91527
mp-756009	-1.12867	-1.131
mp-775732	-2.00928	-1.93241
mp-766905	-2.94585	-2.97328
mp-849394	-2.67335	-2.70276
mp-19731	-0.547878	-0.558396
mp-25696	-2.00748	-2.01099
mp-10394	-0.0740603	-0.0853586
mp-764737	-2.65828	-2.65701
mp-560601	-1.95711	-1.96493
mp-1827	-0.42134	-0.416697
mp-855	-0.0579864	-0.00908811
mp-13302	-0.78066	-0.75088
mp-777707	-2.3597	-2.37815
mp-771203	-2.32151	-2.3305
mp-566991	-2.70396	-2.70253
mp-850500	-2.44447	-2.44903
mp-9277	-1.52512	-1.45403
mp-570930	-0.462001	-0.45791
mp-22618	-2.07661	-2.07925
mp-9545	-0.269762	-0.272344
mp-23598	-1.66715	-1.62701
mp-540838	-2.25204	-2.28438
mp-697856	-2.86034	-2.86845
mp-582767	-1.95214	-1.95079
mp-763363	-2.43765	-2.41286
mp-763099	-2.44768	-2.61982
mp-5221	-0.58256	-0.574396
mp-782818	-2.66301	-2.68105
mp-769729	-1.82143	-1.81963
mp-558740	-1.83443	-1.82275
mp-10343	-0.786407	-0.570954
mp-540208	-2.50018	-2.51441
mp-4964	-1.13279	-1.2181
mp-10428	-0.130415	-0.127014
mp-23801	-1.60836	-1.54426
mp-1019549	-3.26909	-3.31827
mp-36234	-1.39908	-1.41923
mp-11037	-0.418177	-0.423699
mp-565886	-2.12806	-2.11185
mp-766163	-2.26339	-2.25515
mp-3726	-0.631391	-0.664063
mp-761590	-2.21131	-2.21555
mp-560223	-2.01592	-1.99278
mp-561902	-0.609831	-0.60929
mp-30594	-0.0479682	-0.0709785
mp-18747	-2.55649	-2.5984
mp-540855	-0.326891	-0.487168
mp-1786	-0.281564	-0.350936
mp-767906	-2.51184	-2.51677
mp-863377	-2.52262	-2.50568
mp-1253	-1.86963	-2.04812
mp-13541	-3.16331	-3.20695
mp-30537	-2.84505	-2.84645
mp-20689	-0.648712	-0.625187
mp-779854	-2.49842	-2.50764
mp-764053	-2.89022	-2.88332
mp-568545	-0.342769	-0.339521
mp-866972	-1.59654	-1.58516
mp-977559	-0.778361	-0.771115
mp-567957	-0.338258	-0.363653
mp-16234	-0.442961	-0.436696
mp-998241	-2.13311	-2.52583
mp-765818	-1.35063	-1.36551
mp-35539	-0.493801	-0.507664
mp-973920	-3.11804	-2.70645
mp-7221	-0.582769	-0.502653
mp-770155	-2.57609	-2.58987
mp-556137	-3.30594	-3.32326
mp-866660	-0.573981	-0.563121
mp-19284	-0.673864	-0.678842
mp-774093	-2.37525	-2.38051
mp-769626	-2.42517	-2.34808
mp-2719	-0.578598	-0.600036
mp-632402	-3.88054	-3.83365
mp-4487	-0.461368	-0.469877
mp-12533	-4.02833	-4.06599
mp-978695	-0.890778	-0.956034
mp-27607	-0.290879	-0.263756
mp-763082	-1.95804	-1.95325
mp-10347	-3.31866	-3.34397
mp-650178	-1.02944	-1.02288
mp-21628	-0.211523	-0.220456
mp-569161	-1.36416	-1.37352
mp-864734	-0.682911	-0.693325
mp-28489	-0.92934	-0.913228
mp-765828	-2.01281	-2.01819
mp-2954	-0.562875	-0.552481
mp-778794	-2.14233	-2.13877
mp-27834	-1.16966	-1.17224
mp-777056	-2.48966	-2.49643
mp-973109	-0.69027	-0.652368
mp-505807	-0.167103	-0.174995
mp-11571	-0.431773	-0.417
mp-755512	-3.6573	-3.70535
mp-565583	-3.3256	-3.3432
mp-765139	-2.63927	-2.61313
mp-567722	-1.33027	-1.35908
mp-1008926	-0.18361	0.11738
mp-34296	-1.80729	-1.84749
mp-39888	-2.57709	-2.56123
mp-763557	-2.36028	-2.34849
mp-771994	-1.12842	-1.14188
mp-625548	-1.31559	-1.38475
mp-541168	-2.93434	-2.94154
mp-775402	-1.09678	-1.10413
mp-225	-0.282076	-0.262028
mp-567597	0.00345185	0.0608161
mp-779269	-2.6267	-2.6443
mp-1007918	-0.894959	-0.88611
mp-12286	-3.49443	-3.52504
mp-764834	-1.60258	-1.595
mp-567248	-0.441369	-0.426533
mp-13378	-0.712553	-0.731765
mp-1018083	-0.342971	-0.138448
mp-24091	-1.93079	-1.87713
mp-680944	-3.04639	-3.05792
mp-6027	-1.84838	-1.79943
mp-755446	-2.03112	-2.08322
mp-1719	-1.58299	-1.43797
mp-743873	-2.81906	-2.84009
mp-763584	-2.39041	-2.36917
mp-29096	-0.519343	-0.510661
mp-28085	-2.65102	-2.65038
mp-721943	-1.87267	-1.86346
mp-763827	-2.52723	-2.51672
mp-27779	-1.27564	-1.2826
mp-20151	-0.399706	-0.423065
mp-705514	-0.67728	-0.699689
mp-704198	-2.46071	-2.46078
mp-775778	-2.77294	-2.82173
mp-674352	-0.53003	-0.513402
mp-505815	-1.59629	-1.59091
mp-762382	-2.4593	-2.4708
mp-771423	-2.2042	-2.2299
mp-35889	-1.24607	-0.962437
mp-973633	-0.780805	-0.793301
mp-676349	-0.517735	-0.504218
mp-1675	-0.771591	-0.780842
mp-771904	-2.20105	-2.18298
mp-27064	-2.2086	-2.20195
mp-765853	-2.85121	-2.87432
mp-19833	-0.701582	-0.762356
mp-698728	-1.83705	-1.67302
mp-4555	-2.21463	-2.2537
mp-556489	-3.00185	-3.00893
mp-776091	-3.01502	-3.05387
mp-762693	-2.3067	-2.29778
mp-20906	-0.341172	-0.328218
mp-778071	-4.29943	-4.28986
mp-557844	-3.02668	-3.02867
mp-972272	-0.711744	-0.719312
mp-16599	-2.87581	-2.86104
mp-761254	-2.50944	-2.52173
mp-636105	-0.0584189	-0.0944834
mp-542220	-0.263838	-0.231446
mp-10895	-0.291239	-0.314064
mp-557989	-2.02768	-1.99551
mp-674366	-2.74906	-2.7599
mp-505139	-2.30175	-2.27604
mp-685168	-3.45445	-3.45669
mp-775116	-2.51993	-2.53751
mp-865848	-0.344187	-0.331109
mp-510374	-1.53027	-1.53677
mp-978853	-0.606571	-0.643284
mp-2619	-0.0296452	0.0217654
mp-4041	-0.376242	-0.434275
mp-19865	-0.448587	-0.421764
mp-774048	-2.55055	-2.57743
mp-540440	-2.23325	-2.26473
mp-779798	-2.21898	-2.21937
mp-1527	-0.261896	-0.265265
mp-771872	-2.04186	-2.0451
mp-3777	-1.30833	-1.317
mp-10950	-2.8231	-2.90205
mp-173	-0.192113	-0.170753
mp-767701	-2.46323	-2.49518
mp-1017982	0.797971	0.724664
mp-776049	-2.44473	-2.45794
mp-999540	-0.359849	-0.360264
mp-780147	-2.57382	-2.5836
mp-24044	-1.48736	-1.47803
mp-554475	-3.24183	-3.22354
mp-771064	-2.43543	-2.42112
mp-567401	-0.528871	-0.477354
mp-13536	-0.465606	-0.452167
mp-776001	-2.46692	-2.49086
mp-11666	-0.422533	-0.417969
mp-1002124	-0.31107	-0.301016
mp-755018	-2.99167	-2.99488
mp-775647	-2.11885	-2.09353
mp-765454	-2.48507	-2.45746
mp-975216	-1.94874	-1.99623
mp-738629	-1.60662	-1.60061
mp-19416	-3.04924	-3.08159
mp-555717	-2.44825	-2.48859
mp-997008	-0.793582	-0.78539
mp-705332	-2.35979	-2.37873
mp-765969	-2.23004	-2.21963
mp-989565	-2.83264	-2.84648
mp-7499	-0.778012	-0.761783
mp-776115	-2.24278	-2.27762
mp-771213	-2.6239	-2.61471
mp-555884	-2.01516	-2.01171
mp-999068	-0.16448	-0.104204
mp-570403	-0.289681	-0.288576
mp-637201	-2.32443	-2.30952
mp-755543	-3.03687	-3.04937
mp-12778	-0.341605	-0.236019
mp-971826	0.218356	0.418425
mp-972510	-0.84281	-0.838612
mp-558056	-3.11945	-3.13195
mp-7109	-0.98797	-0.978247
mp-31347	-0.767961	-0.748688
mp-777495	-2.66373	-2.68228
mp-6565	-3.12492	-3.14154
mp-669326	-0.588628	-0.590579
mp-697111	-1.52555	-1.39311
mp-770171	-2.6599	-2.67795
mp-559614	-2.58476	-2.58026
mp-770702	-2.47731	-2.48582
mp-6507	-2.60278	-2.59241
mp-3797	-1.17785	-1.20624
mp-41734	-3.04953	-3.04934
mp-514	-0.148908	-0.209845
mp-771534	-2.23783	-2.23196
mp-630820	-0.555182	-0.551392
mp-649033	-0.822396	-0.802948
mp-763439	-3.19594	-3.21476
mp-25017	-2.65944	-2.66693
mp-7792	-2.35717	-2.38762
mp-30717	-0.267791	-0.271518
mp-672273	-1.67179	-1.69703
mp-773165	-1.52763	-1.51543
mp-772258	-2.65288	-2.66265
mp-12689	-0.896118	-0.881788
mp-5476	-3.39198	-3.43877
mp-36252	-1.6352	-1.63606
mp-684024	-1.07042	-1.1172
mp-972117	-2.41063	-2.39754
mp-542675	-1.38482	-1.40836
mp-25405	-2.15943	-2.16944
mp-642804	-2.01348	-2.04478
mp-25485	-1.9162	-1.89699
mp-752666	-1.84335	-1.86232
mp-770337	-2.29967	-2.28957
mp-849685	-1.39709	-1.39787
mp-4865	-0.672709	-0.675743
mp-12146	-3.56854	-3.5408
mp-2250	-0.441559	-0.410028
mp-557035	-2.51053	-2.51345
mp-774121	-2.40723	-2.45749
mp-951	-0.688388	-0.72387
mp-19249	-1.91685	-1.89331
mp-753823	-4.20636	-4.27608
mp-640859	-1.86131	-1.85859
mp-759735	-2.53511	-2.5395
mp-622491	-1.38904	-1.38085
mp-705002	-2.67765	-2.64186
mp-771353	-2.55794	-2.54738
mp-643564	-1.80199	-1.85004
mp-557450	-1.51281	-1.5076
mp-15551	-0.438118	-0.443354
mp-550579	-2.72682	-2.78952
mp-569486	-0.243482	-0.30103
mp-25612	-2.25581	-2.26058
mp-15362	-3.08972	-3.10673
mp-541753	-1.09688	-1.11602
mp-1739	-0.699152	-0.678929
mp-8540	-0.347567	-0.27694
mp-764812	-2.83984	-2.85309
mp-32373	-2.30526	-2.31725
mp-763490	-2.81799	-2.82378
mp-755010	-2.50094	-2.33608
mp-680671	-0.0824767	-0.126834
mp-29375	-1.22552	-1.25999
mp-17677	-3.02493	-3.03215
mp-754540	-1.14722	-1.15979
mp-27980	-2.99582	-3.69074
mp-12631	-2.39373	-2.4782
mp-7664	-1.5838	-1.55411
mp-18612	-1.33914	-1.32518
mp-780115	-2.58098	-2.57509
mp-774309	-2.66233	-2.66814
mp-775125	-2.52436	-2.52831
mp-767081	-2.03332	-2.08357
mp-759381	-2.4837	-2.49725
mp-772610	-2.03175	-2.02314
mp-767355	-2.11833	-2.1273
mp-753802	-3.69958	-3.74836
mp-769813	-2.46013	-2.52218
mp-16622	-0.532381	-0.520827
mp-4066	-2.20814	-2.20812
mp-868564	-1.8522	-1.83682
mp-542926	-3.02227	-3.03926
mp-24131	-0.687763	-0.68858
mp-10889	-0.178262	-0.189959
mp-763718	-2.78391	-2.78433
mp-763057	-1.31517	-1.34112
mp-539	-1.05439	-1.06193
mp-623088	-3.53316	-3.491
mp-773242	-2.24692	-2.28526
mp-761563	-1.874	-1.86439
mp-15438	-2.50251	-2.50117
mp-573498	-0.377099	-0.374516
mp-24589	-1.66679	-1.67592
mp-1019525	-3.02955	-3.03527
mp-12108	-0.473374	-0.554891
mp-973981	-3.15875	-3.19012
mp-767900	-2.62749	-2.6557
mp-17434	-3.7555	-3.75999
mp-21901	-0.348515	-0.331894
mp-996962	-0.97967	-1.12127
mp-557019	-2.4687	-2.43655
mp-540832	-2.5536	-2.53692
mp-32884	-0.278225	-0.274491
mp-705083	-2.04108	-2.05901
mp-559955	-1.88087	-1.88759
mp-754833	-2.46269	-2.47828
mp-14015	-0.0181362	-0.00680364
mp-24831	-1.45456	-1.46768
mp-582389	-0.369135	-0.393237
mp-675751	-3.39908	-3.42308
mp-559610	-2.9464	-2.94084
mp-19956	-2.87523	-2.8843
mp-23261	-0.813258	-0.776406
mp-556339	-1.06615	-1.07482
mp-14763	-1.01461	-1.03127
mp-604459	-2.35331	-2.3652
mp-567141	-1.86748	-1.71915
mp-775022	-2.17087	-2.34325
mp-774714	-2.51759	-2.54145
mp-505702	-1.71537	-1.74066
mp-764713	-2.49758	-2.51933
mp-19581	-2.97691	-2.9772
mp-776038	-2.80884	-2.85779
mp-782053	-2.83254	-2.84282
mp-753524	-2.0373	-2.04685
mp-7638	-3.28421	-3.27709
mp-865427	-2.66615	-2.80347
mp-19496	-2.27764	-2.2598
mp-763436	-2.18751	-2.19953
mp-998988	-0.271804	-0.18946
mp-775753	-2.47513	-2.49628
mp-16988	-1.11399	-1.11091
mp-726	-1.16401	-1.17175
mp-672223	-1.6398	-1.49168
mp-29806	-0.767757	-0.786987
mp-767621	-2.43246	-2.44998
mp-16356	-0.634284	-0.676291
mp-773719	-1.82649	-1.82409
mp-771986	-1.80825	-1.81072
mp-961650	0.193311	0.375707
mp-542879	-0.305015	-0.308265
mp-864889	-0.302268	-0.280297
mp-24151	-0.785216	-0.786642
mp-755920	-3.04915	-3.08338
mp-759790	0.0900183	0.0635746
mp-24927	-1.92921	-2.02131
mp-779689	-0.666134	-0.519317
mp-554227	-2.50391	-2.51165
mp-764455	-2.24628	-2.25039
mp-758841	-1.9072	-1.88294
mp-555005	-2.83223	-2.81611
mp-36699	-3.87133	-3.92881
mp-756452	-3.84413	-3.88214
mp-775715	-2.10121	-2.10363
mp-775628	-2.74418	-2.74695
mp-762264	-2.4878	-2.45993
mp-28708	-2.26362	-2.31753
mp-694892	-2.89425	-2.90915
mp-735589	-2.74963	-2.75693
mp-371	-0.240807	-0.245337
mp-5380	-1.72459	-1.77922
mp-557748	-1.93326	-1.9451
mp-677217	-1.15949	-1.12622
mp-557668	-2.21278	-2.21819
mp-764943	-2.33539	-2.30856
mp-773247	-1.57439	-1.58985
mp-961666	-0.0823003	0.392545
mp-780123	-2.40352	-2.4194
mp-770667	-2.23676	-2.23869
mp-776184	-2.05769	-2.10644
mp-866117	-0.445139	-0.436073
mp-950217	-0.437441	-0.262991
mp-771668	-2.44781	-2.36435
mp-759198	-2.46526	-2.45054
mp-972914	-0.360668	-0.361647
mp-849474	-1.75248	-1.75013
mp-867215	-0.448372	-0.438382
mp-1016106	-0.0644287	-0.0598072
mp-1013749	-2.58589	-2.50095
mp-761298	-2.6001	-2.62018
mp-30159	-1.30989	-1.30983
mp-767576	-2.18065	-2.2044
mp-867895	-0.228102	-0.23035
mp-1019596	-3.69543	-3.85023
mp-10892	-0.60813	-0.641227
mp-762279	-3.40121	-3.3948
mp-757173	-1.77746	-1.79511
mp-26377	-2.5877	-2.60082
mp-767041	-1.99481	-1.96128
mp-863066	-2.91316	-2.92125
mp-764215	-2.07478	-2.17004
mp-771622	-2.36824	-2.35515
mp-2281	-1.19106	-1.17602
mp-1638	-0.254846	-0.253989
mp-1018123	-0.439786	-0.424428
mp-17897	-3.13927	-3.15562
mp-772245	-1.5669	-1.6489
mp-27999	-0.362314	-0.359449
mp-779518	-2.77816	-2.7957
mp-971859	0.553403	0.628398
mp-7961	-1.64619	-1.6605
mp-541837	-0.491112	-0.383905
mp-763386	-2.44504	-2.45314
mp-631331	0.627599	0.646559
mp-28997	-0.68814	-0.653244
mp-644280	-0.451108	-0.479617
mp-557134	-3.17327	-3.20326
mp-752733	-2.68758	-2.67403
mp-21684	-0.516697	-0.528644
mp-771235	-3.4301	-3.43062
mp-27600	-2.24059	-2.25414
mp-761816	-1.43497	-1.44954
mp-19932	-0.42112	-0.417443
mp-850372	-2.46496	-2.46616
mp-25625	-2.24909	-2.20502
mp-1529	-1.02401	-0.99507
mp-764494	-2.73144	-2.73818
mp-27140	-2.00369	-1.9956
mp-556674	-2.57972	-2.57787
mp-14243	-1.58902	-1.53755
mp-18373	-1.39421	-1.38901
mp-566592	-2.31761	-2.31751
mp-984717	-0.293985	-0.146492
mp-13042	-3.18038	-3.18553
mp-474	-0.133825	-0.12359
mp-765708	-3.02318	-3.0481
mp-769799	-1.6533	-1.6592
mp-754790	-2.67607	-2.69277
mp-7226	-0.119792	-0.155972
mp-765886	-1.48716	-1.57207
mp-762973	-2.61177	-2.6217
mp-762247	-2.35601	-2.32692
mp-569428	-0.0316685	-0.0441288
mp-31036	-0.165709	-0.201757
mp-554918	-3.47966	-3.53276
mp-542933	-0.183499	-0.18077
mp-1180	-0.328877	-0.361485
mp-16826	-0.98981	-0.968191
mp-1008	0.263964	0.222986
mp-771303	-2.52967	-2.51434
mp-766777	-2.53594	-2.54054
mp-740719	-1.91443	-1.89679
mp-17777	-2.84133	-2.87481
mp-762724	-2.60522	-2.58764
mp-778709	-2.3169	-2.31768
mp-864981	-0.632759	-0.608547
mp-556975	-1.93836	-1.94135
mp-1008752	-1.29805	-1.23602
mp-763242	-2.74767	-2.75676
mp-765364	-2.27019	-2.27406
mp-853140	-2.53033	-2.53291
mp-30119	-1.96464	-2.0229
mp-721347	-2.32486	-2.32399
mp-762819	-2.03542	-2.02226
mp-542078	-0.9275	-0.905477
mp-782641	-2.14883	-2.14366
mp-771068	-2.37047	-2.38347
mp-851007	-2.0711	-2.01189
mp-3216	-1.28015	-1.25735
mp-11644	0.0097369	-0.0132917
mp-707285	-1.17179	-1.14401
mp-977586	-0.296011	-0.29159
mp-770330	-2.57001	-2.56235
mp-866500	-1.98383	-1.96948
mp-757806	-2.52352	-2.51423
mp-580748	-0.524147	-0.561984
mp-23583	-1.83449	-1.79592
mp-765381	-2.73041	-2.70368
mp-977438	-0.52952	-0.544975
mp-626193	-2.22351	-2.30418
mp-30251	-2.54182	-2.58907
mp-765595	-2.42888	-2.43395
mp-30473	-0.523741	-0.512028
mp-555147	-3.22598	-3.19887
mp-975397	0.153184	0.150797
mp-776061	-2.83743	-2.85543
mp-18163	-0.498087	-0.506945
mp-28320	-0.15931	-0.161132
mp-29724	-0.273539	-0.271804
mp-763081	-2.20639	-2.21483
mp-766360	-2.44208	-2.46763
mp-558724	-2.09713	-2.07919
mp-767695	-2.86319	-2.86855
mp-565656	-2.81322	-2.8189
mp-974221	-0.326401	-0.31249
mp-23944	-1.25148	-1.2935
mp-754246	-2.74977	-2.77485
mp-20643	-2.59352	-2.59595
mp-16504	-0.545745	-0.544962
mp-603327	-1.2853	-1.32544
mp-560535	-2.93138	-2.92747
mp-704836	-2.49954	-2.42593
mp-30278	-1.00908	-0.944731
mp-764218	-2.79465	-2.79359
mp-4993	-0.839189	-0.843626
mp-772348	-2.00922	-2.00438
mp-540940	-0.626187	-0.675402
mp-770968	-2.18078	-2.19274
mp-4438	-2.64274	-2.68626
mp-35929	-2.06334	-2.09912
mp-603609	-1.43834	-1.4447
mp-767716	-3.00743	-2.98677
mp-556592	-0.731867	-0.740221
mp-754408	-1.73053	-1.71481
mp-7073	-2.00184	-2.047
mp-30479	-0.462671	-0.383578
mp-754202	-1.24192	-1.28421
mp-2617	-0.208011	-0.256562
mp-690684	-1.88354	-1.92039
mp-778325	-2.71038	-2.71725
mp-763359	-1.88045	-1.87541
mp-686947	-2.7141	-2.71839
mp-15178	-0.268919	-0.323484
mp-556262	-3.26382	-3.27436
mp-571662	-0.903478	-0.856627
mp-567278	-1.33309	-1.31597
mp-7263	-0.896507	-0.847944
mp-550893	-2.62523	-3.95507
mp-776357	-2.82347	-2.78531
mp-23552	-1.51978	-1.50995
mp-770311	-2.57516	-2.5655
mp-997013	-0.404927	-0.413127
mp-27987	-1.37802	-1.34642
mp-2183	-1.59752	-1.54774
mp-647818	-2.2133	-2.2355
mp-23152	-0.00492343	0
mp-764981	-2.84005	-2.8711
mp-8966	-0.723446	-0.727442
mp-631303	0.76787	0.658559
mp-29221	-4.08039	-4.10995
mp-675472	-3.13188	-3.13316
mp-510486	-0.470569	-0.576628
mp-865002	-0.601355	-0.59911
mp-917	-0.0113185	0.0155134
mp-12233	-2.71603	-2.70541
mp-540966	-0.655625	-0.607716
mp-30771	-0.449256	-0.442064
mp-16035	-3.1878	-3.21566
mp-569952	-1.73735	-1.73534
mp-989594	-0.191065	-0.198605
mp-698600	-2.04901	-2.03603
mp-771902	-2.54543	-2.55595
mp-771616	-2.14134	-2.15789
mp-505186	-1.33139	-1.31827
mp-30335	-0.163023	-0.166394
mp-27227	-0.752117	-0.822067
mp-1275	-0.213768	-0.297078
mp-759673	-2.49517	-2.51391
mp-21466	-2.48958	-2.53846
mp-24095	-0.746428	-0.705954
mp-546621	-2.35863	-2.37188
mp-18164	-2.31155	-2.3265
mp-554766	-1.92462	-1.82005
mp-763952	-2.1348	-2.12615
mp-36529	-2.19001	-2.19985
mp-631387	0.880617	0.594772
mp-778920	-2.48181	-2.49329
mp-504795	-2.28875	-2.27152
mp-17649	-2.49046	-2.49733
mp-776273	-2.28984	-2.28854
mp-600016	-3.26856	-3.27827
mp-9522	-1.4386	-1.4827
mp-778706	-2.26977	-2.26704
mp-765457	-3.00507	-3.02781
mp-20337	-2.44674	-2.8661
mp-775327	-2.43401	-2.45039
mp-780479	-2.42765	-2.43235
mp-8638	-0.00436214	0.0694062
mp-773726	-2.38698	-2.39107
mp-767296	-2.63344	-2.64693
mp-32113	-2.40891	-2.41636
mp-781698	-1.47504	-1.48443
mp-768510	-2.67646	-2.65725
mp-12563	-0.768482	-0.576455
mp-977439	-0.279979	-0.245266
mp-11690	-0.512109	-0.537903
mp-1018732	-1.11486	-1.12701
mp-30343	-0.356428	-0.0403464
mp-772013	-2.52033	-2.53504
mp-777942	-0.397842	-0.377971
mp-676643	-1.87813	-1.87487
mp-25057	-2.16949	-2.2046
mp-782009	-2.00421	-1.94776
mp-27840	-0.481391	-0.496141
mp-977239	0.235819	0.418103
mp-635	-0.607655	-0.616035
mp-542452	-1.25501	-1.25556
mp-768486	-1.93456	-1.91616
mp-781607	-2.39395	-2.41157
mp-569849	-0.268123	-0.233378
mp-770032	-2.22315	-2.23596
mp-765498	-2.87911	-2.92065
mp-541938	-0.525821	-0.543869
mp-13938	-3.01981	-3.0294
mp-774	-0.109851	-0.109745
mp-8116	-1.12948	-1.07707
mp-696878	-2.74977	-2.75292
mp-21222	-0.744965	-0.73332
mp-765930	-1.97559	-1.95551
mp-866150	-0.129096	-0.140969
mp-772006	-2.37402	-2.41097
mp-541062	-1.01275	-1.01535
mp-760255	-2.57882	-2.61672
mp-680472	-0.759146	-0.76488
mp-763333	-2.65061	-2.65753
[truncated: 7,275 more rows]

## Sheet: agg3
name	prediction	target
mp-849675	-2.48717	-2.48929
mp-756392	-2.63573	-2.6252
mp-775445	-1.76316	-1.73387
mp-27760	-0.58862	-0.600461
mp-975368	0.0110171	-0.0305083
mp-733637	-1.39122	-1.4027
mp-10782	-1.72911	-1.72873
mp-23165	-0.303104	-0.261028
mp-762258	-2.02114	-2.06247
mp-29245	-0.302563	-0.310339
mp-763857	-2.71346	-2.71288
mp-16167	-0.625356	-0.618756
mp-9767	-0.790294	-0.826163
mp-27792	-2.04122	-2.03579
mp-764830	-2.82267	-2.84299
mp-752514	-1.6998	-1.73031
mp-626568	-2.07979	-2.07843
mp-504742	-0.285959	-0.31157
mp-16821	-2.58358	-2.57902
mp-3591	-0.69882	-0.706972
mp-11254	-0.78151	-0.764235
mp-775484	-3.47487	-3.48541
mp-973951	-0.660424	-0.650351
mp-863884	-3.05131	-3.03994
mp-685281	-1.98578	-2.00176
mp-638590	-0.223062	-0.192915
mp-1239	-0.280819	-0.340251
mp-570900	-0.215303	-0.222707
mp-12570	-0.24212	-0.249034
mp-776082	-3.31921	-3.27921
mp-558458	-3.38539	-3.4364
mp-28073	-2.66159	-2.68688
mp-19580	-2.85388	-2.85983
mp-699558	-2.39757	-2.38528
mp-755794	-2.26885	-2.2543
mp-851027	-2.02443	-2.07686
mp-9071	-0.558829	-0.522414
mp-505543	-0.698881	-0.650078
mp-568942	-0.478002	-0.478589
mp-5091	-0.413747	-0.426156
mp-625915	-2.2216	-2.22364
mp-753414	-2.45777	-2.51505
mp-769039	-3.03178	-3.04128
mp-984716	-2.59886	-2.61721
mp-568350	-1.96779	-1.99225
mp-28040	-0.245023	-0.295251
mp-35421	-2.51558	-2.55403
mp-775965	-2.26519	-2.24512
mp-975857	0.264986	0.15189
mp-772231	-2.04611	-1.98945
mp-690526	-1.85933	-1.85189
mp-556135	-2.03016	-2.0429
mp-754010	-1.159	-1.13948
mp-770231	-2.11569	-2.14464
mp-677138	-2.53133	-2.4992
mp-763011	-2.89627	-2.91686
mp-30311	-0.899305	-0.865423
mp-30460	-0.652059	-0.670611
mp-865866	-0.888514	-0.876126
mp-19575	-1.66671	-1.82213
mp-505270	-2.66451	-2.64802
mp-753656	-2.14166	-2.12354
mp-770097	-1.76732	-1.75978
mp-763320	-2.89458	-2.88322
mp-1009792	0.625556	0.453408
mp-20846	-0.410765	-0.436858
mp-4187	-0.733884	-0.834142
mp-771645	-1.61954	-1.6658
mp-1244	-0.505501	-0.486424
mp-556627	-1.35323	-1.35875
mp-763530	-2.62916	-2.62342
mp-762879	-2.35595	-2.33973
mp-556385	-1.29378	-1.33609
mp-265	-0.607513	-0.684115
mp-773763	-2.1169	-2.03267
mp-541177	-3.25427	-3.26282
mp-764366	-1.24697	-1.27938
mp-690978	-3.40687	-3.38091
mp-676456	-3.53435	-3.55713
mp-760385	0.0140861	0.0935748
mp-24337	-1.82803	-1.84461
mp-17902	-1.71418	-1.7291
mp-698480	-1.77651	-1.78595
mp-978939	0.0652295	0.0579219
mp-687152	-1.4554	-1.44051
mp-769271	-3.43283	-3.44928
mp-31589	-2.11033	-2.1284
mp-1008556	-0.900155	-1.11474
mp-12843	-1.69058	-1.70781
mp-754933	-2.5802	-2.63871
mp-8597	-0.58846	-0.575035
mp-8919	-1.18446	-1.27549
mp-723175	-2.23252	-2.22406
mp-1020616	-2.90789	-2.92406
mp-766176	-2.55845	-2.53597
mp-780483	-2.47375	-2.47012
mp-7094	-1.74569	-1.73344
mp-556717	-1.1089	-1.18401
mp-776618	-2.42129	-2.42733
mp-541140	-0.669492	-0.640536
mp-779925	-2.48368	-2.57264
mp-778698	-1.76794	-1.76375
mp-676780	-0.500807	-0.442569
mp-21401	-0.906931	-0.924938
mp-540540	-2.17381	-2.24174
mp-780204	-2.313	-2.28816
mp-30644	-0.37832	-0.456467
mp-558967	-1.29666	-1.31006
mp-2914	-0.81604	-0.857201
mp-556661	-3.28215	-3.31249
mp-767031	-3.08792	-3.1117
mp-542839	-0.127846	-0.0940199
mp-754322	-2.28326	-2.20209
mp-771568	-1.61823	-1.58031
mp-695843	-0.954894	-0.936894
mp-764125	-2.60247	-2.60254
mp-707218	-2.77883	-2.7709
mp-19329	-2.61346	-2.61103
mp-11055	-0.307678	-0.298511
mp-18819	-2.08607	-2.12639
mp-643656	-0.590424	-0.502864
mp-762530	-2.47661	-2.46718
mp-771456	-1.71871	-1.74178
mp-982662	-3.32762	-3.36321
mp-29784	-1.11232	-1.1103
mp-530294	-3.82141	-3.86265
mp-977551	-0.0626	-0.0501918
mp-555958	-2.85649	-2.87713
mp-555443	-2.00642	-2.06981
mp-771988	-2.24015	-2.23499
mp-767147	-2.48436	-2.5158
mp-4454	-0.518543	-0.487294
mp-505299	-2.62373	-2.60365
mp-567258	-0.388191	-0.365376
mp-11971	-0.894147	-0.91126
mp-18629	-2.90775	-2.91587
mp-776323	-2.26033	-2.25094
mp-1029	-4.10075	-4.18139
mp-763065	-2.1502	-2.24214
mp-601817	-0.214564	-0.0648166
mp-25906	-2.44621	-2.40022
mp-4805	-3.55945	-3.56403
mp-774586	-2.75735	-2.7757
mp-776922	-1.16407	-1.1178
mp-1011260	-2.44236	-2.52754
mp-779766	-1.65922	-1.62086
mp-560387	-3.02585	-3.01307
mp-777912	-2.28258	-2.26018
mp-867177	-0.410876	-0.412057
mp-10489	-0.896308	-0.9637
mp-20108	-0.436158	-0.426986
mp-555151	-1.13347	-1.13992
mp-541735	-1.43324	-1.44029
mp-770014	-2.68151	-2.66526
mp-998147	-0.988871	-1.04573
mp-755751	-4.28164	-4.30487
mp-19178	-1.01702	-1.04962
mp-849514	-2.43588	-2.41029
mp-776733	-3.1749	-3.18002
mp-542164	-1.08653	-1.13185
mp-32324	-2.25985	-2.28247
mp-4122	-2.57618	-2.60255
mp-781082	-2.68631	-2.59185
mp-2489	-0.169334	-0.122809
mp-685606	-1.8678	-1.86446
mp-778276	-2.40178	-2.39227
mp-25755	-2.6223	-2.58724
mp-1156	0.00103304	-0.162561
mp-772195	-3.69993	-3.71911
mp-693753	-3.19046	-3.2263
mp-5116	-2.04849	-2.04949
mp-767707	-2.60455	-2.62373
mp-530449	-2.76239	-2.72421
mp-33753	-2.71467	-2.70247
mp-769118	-3.18144	-3.10103
mp-4952	-0.330201	-0.319297
mp-770633	-2.28324	-2.28268
mp-15239	-2.92459	-2.92506
mp-569568	-0.554479	-0.570784
mp-777469	-2.40177	-2.45259
mp-761598	-2.76257	-2.78302
mp-510264	-2.66098	-2.68275
mp-622213	-0.792281	-0.757307
mp-667305	-1.9939	-1.95264
mp-3352	-0.969957	-0.994166
mp-972185	-0.0135677	0.0210676
mp-18019	-2.98305	-2.99736
mp-556544	-3.22158	-3.2073
mp-18332	-2.03053	-2.07353
mp-556665	-0.744935	-0.747303
mp-866536	-0.460697	-0.29905
mp-34326	-1.25875	-1.10935
mp-9486	-3.52989	-3.53349
mp-7924	-0.146216	-0.181283
mp-27272	-1.47677	-1.52523
mp-999550	0.00636283	0.0597964
mp-631451	0.759748	0.776139
mp-705333	-2.54567	-2.51892
mp-9775	-0.811619	-0.870939
mp-768015	-1.80468	-1.81265
mp-756118	-3.82883	-3.86239
mp-27775	-2.51402	-2.57197
mp-568782	-0.663643	-0.644146
mp-850481	-2.11265	-2.14208
mp-865878	-0.411549	-0.478647
mp-19732	-1.1447	-1.11639
mp-761431	-2.6162	-2.64819
mp-19114	-2.53407	-2.55958
mp-10003	-0.365595	-0.343186
mp-853199	-2.23208	-2.24662
mp-21900	-1.03623	-1.04914
mp-977579	-0.602333	-0.608965
mp-774223	-1.50063	-1.49264
mp-763701	-2.61585	-2.72469
mp-767810	-2.09041	-2.05511
mp-23326	-2.88582	-2.89005
mp-590	-0.346578	-0.288202
mp-2971	-0.158702	-0.175389
mp-33737	-1.4889	-1.50745
mp-11299	-0.0206997	0.00955682
mp-654225	-1.63979	-1.63794
mp-540431	-2.41531	-2.44058
mp-778590	-2.1	-2.12783
mp-573721	-0.441302	-0.457054
mp-410	-1.00169	-1.08973
mp-24436	-2.17642	-2.1623
mp-558672	-2.72751	-2.73033
mp-771786	-1.28755	-1.3276
mp-771071	-2.35473	-2.38276
mp-23386	-0.610669	-0.617232
mp-672689	-0.684995	-0.686017
mp-19508	-3.17475	-3.19031
mp-11554	-0.963007	-0.911937
mp-1018715	-0.107233	0.0326237
mp-1008524	-0.466648	-0.302315
mp-13053	-0.475983	-0.461893
mp-763155	-1.72085	-1.71033
mp-756018	-2.94295	-2.91557
mp-637255	-0.291794	-0.307103
mp-770341	-2.54524	-2.56805
mp-764801	-2.02394	-2.07998
mp-16996	-2.70843	-2.70517
mp-31094	-0.706624	-0.693188
mp-780288	-2.24264	-2.23972
mp-690607	-1.14945	-1.25683
mp-20485	-0.481341	-0.511518
mp-5942	-0.895743	-0.930315
mp-570680	-0.868105	-0.871055
mp-11113	-0.685083	-0.690918
mp-4955	-0.377306	-0.416416
mp-768490	-1.93849	-1.99771
mp-763681	-2.00849	-2.00154
mp-625184	-2.1692	-2.18863
mp-30776	-0.0332277	-0.0379159
mp-773925	-2.26313	-2.28127
mp-510564	-0.439556	-0.45033
mp-23013	-2.8086	-2.88363
mp-641191	-2.5114	-2.50626
mp-695515	-3.14503	-3.15227
mp-17660	-1.49503	-1.53735
mp-764286	-2.74941	-2.81315
mp-777911	-2.27382	-2.26791
mp-625652	-1.24039	-1.21091
mp-21014	-0.8788	-0.877852
mp-761814	-2.38249	-2.35259
mp-773081	-2.99934	-2.98814
mp-631549	0.731511	1.27574
mp-767801	-2.40188	-2.36273
mp-566053	-2.2637	-2.27118
mp-771502	-1.92129	-1.89467
mp-976061	-0.420653	-0.371094
mp-744644	-1.52962	-1.5424
mp-770855	-2.4343	-2.43768
mp-764274	-2.60762	-2.72263
mp-771184	-2.00504	-2.03501
mp-566895	-1.69498	-1.70817
mp-33056	0.725651	2.21162
mp-767165	-1.48054	-1.49478
mp-862940	-0.808581	-0.79715
mp-866152	-0.442403	-0.429901
mp-2038	-2.3661	-2.39543
mp-775705	-2.35462	-2.38053
mp-28945	-0.245802	-0.268966
mp-7555	-0.503002	-0.58664
mp-761745	-1.3227	-1.32497
mp-24657	-2.09683	-2.08503
mp-5022	-0.902575	-0.912224
mp-754095	-2.19183	-2.15345
mp-763930	-1.99739	-1.97231
mp-762980	-2.43171	-2.44678
mp-763115	-1.91277	-1.91551
mp-766341	-1.89133	-1.89634
mp-866134	-0.151841	-0.128009
mp-771795	-1.76556	-1.83249
mp-672979	-2.53079	-2.54481
mp-761392	-2.51108	-2.56061
mp-1270	-2.46052	-2.47208
mp-557604	-3.10547	-3.13285
mp-621131	0.029808	0.102095
mp-641945	-0.631817	-0.65507
mp-763978	-2.70645	-2.70604
mp-25154	-2.6637	-2.6623
mp-11436	-0.437545	-0.404651
mp-28357	-2.33692	-2.35904
mp-32425	-2.61706	-2.64098
mp-567391	-1.89223	-1.89736
mp-776435	-2.96989	-3.053
mp-556341	-1.50839	-1.48904
mp-6478	-2.81207	-2.7785
mp-764000	-2.62686	-2.62374
mp-540164	-2.1808	-2.19715
mp-767099	-2.40823	-2.42165
mp-541026	-3.26321	-3.25584
mp-772829	-2.78498	-2.74245
mp-769290	-2.16937	-2.15171
mp-541747	-1.95682	-1.95255
mp-861951	-0.543825	-0.558884
mp-32024	-2.53939	-2.55229
mp-778458	-1.97942	-1.96669
mp-23465	-1.67245	-1.70763
mp-12467	-0.986436	-0.988132
mp-8059	-3.27352	-3.28438
mp-766153	-2.10094	-2.11343
mp-556822	-2.38425	-2.39046
mp-20774	-0.589653	-0.588355
mp-569806	-0.865282	-0.870017
mp-569251	-0.690522	-0.645795
mp-13801	-1.08733	-1.16962
mp-543029	-1.60764	-1.53443
mp-743715	-1.53059	-1.25653
mp-775660	-2.23965	-2.22558
mp-769569	-1.36175	-1.35441
mp-756073	-2.72745	-2.69708
mp-769399	-3.42681	-3.41865
mp-8290	-3.38908	-3.41837
mp-973738	-1.22119	-1.03017
mp-570400	-0.17837	-0.230958
mp-558628	-2.45404	-2.47562
mp-17812	-3.24442	-3.23489
mp-22958	-0.833927	-1.06521
mp-1006368	-1.40168	-1.34876
mp-14115	-1.47	-1.57429
mp-972220	-0.817153	-0.848065
mp-777678	-2.79846	-2.82329
mp-29827	-0.397275	-0.389177
mp-776752	-2.48215	-2.46302
mp-25043	-1.90982	-1.99731
mp-766842	-2.90652	-2.95396
mp-10410	-2.00462	-1.97817
mp-819	-0.0929691	-0.114793
mp-561428	-1.6952	-1.67783
mp-14556	-2.90223	-2.91364
mp-776496	-3.18147	-3.1893
mp-558777	-2.6839	-2.66739
mp-849986	-2.69636	-2.71922
mp-5024	-3.12423	-3.13045
mp-559607	-2.80833	-2.80401
mp-769697	-1.13778	-1.00735
mp-996966	-1.00312	-1.01736
mp-778274	-3.73137	-3.72514
mp-770316	-2.5342	-2.56576
mp-645135	-2.772	-2.80442
mp-1002063	-0.793173	-0.753884
mp-767625	-3.13935	-3.17452
mp-759117	-2.51935	-2.51897
mp-849373	-2.47276	-2.47681
mp-23285	-0.804544	-0.782108
mp-13911	-0.324358	-0.314264
mp-18748	-1.29844	-1.42094
mp-579278	-2.22209	-2.20391
mp-11526	-0.367547	-0.340105
mp-565704	-2.50782	-2.51659
mp-753973	-2.52207	-2.49265
mp-780809	-1.42704	-1.36089
mp-771709	-2.48439	-2.48114
mp-21611	-2.67144	-2.63812
mp-13819	-2.09381	-2.13609
mp-19083	-2.36206	-2.39313
mp-765270	-2.5161	-2.51292
mp-1187	-0.845728	-0.816256
mp-15746	-0.488211	-0.493901
mp-569895	-2.53843	-2.26357
mp-631308	0.458365	0.538691
mp-764088	-2.6649	-2.67113
mp-23626	-1.36794	-1.41096
mp-557203	-3.61174	-3.62928
mp-865402	-0.481314	-0.467329
mp-720212	-3.08675	-3.08908
mp-11225	-0.398779	-0.416154
mp-21810	-0.786808	-0.784689
mp-4264	-2.21052	-2.14661
mp-18257	0.174048	0.0768913
mp-6698	-3.1776	-3.18978
mp-743769	-3.13578	-2.97352
mp-557319	-1.38112	-1.4129
mp-775272	-2.3599	-2.36218
mp-753795	-1.88548	-1.87957
mp-9619	-0.612017	-0.658193
mp-760440	-3.68677	-3.64611
mp-763690	-1.85561	-1.71398
mp-570539	-0.377958	-0.35744
mp-569120	-0.87631	-0.839691
mp-27474	-1.48767	-1.44114
mp-780003	-3.17305	-3.16282
mp-743716	-3.33238	-3.35418
mp-865	-0.337611	-0.409068
mp-32054	-2.52022	-2.44022
mp-561196	-1.13466	-1.13989
mp-29022	-0.771673	-0.754287
mp-19156	-2.36045	-2.47745
mp-777974	-2.34427	-2.34325
mp-772573	-2.41449	-2.47473
mp-767608	-2.65043	-2.65491
mp-27384	-0.737866	-0.733316
mp-764210	-2.40199	-2.37117
mp-774395	-2.13191	-2.13472
mp-2468	-0.473202	-0.478854
mp-4564	-2.82196	-2.82543
mp-22850	-0.856803	-0.982917
mp-10973	-0.775057	-0.808157
mp-20971	-0.32932	-0.385301
mp-767711	-2.90915	-2.90771
mp-567325	-0.580251	-0.552628
mp-774178	-1.53098	-1.50925
mp-1014230	-0.165077	-0.186359
mp-765682	-2.40747	-2.38348
mp-773988	-2.40098	-2.42329
mp-22687	-0.315995	-0.343731
mp-850920	-2.38557	-2.39927
mp-570691	-0.290266	-0.259667
mp-2178	-0.559119	-0.614032
mp-1019578	-1.31853	-1.32372
mp-865798	-0.0316727	-0.0984462
mp-706235	-2.57138	-2.57106
mp-541047	-0.801721	-0.803694
mp-684496	-2.32984	-2.26644
mp-863726	-0.737083	-0.747986
mp-556767	-1.00217	-1.11361
mp-675546	-0.171004	-0.177063
mp-570683	-0.34694	-0.362842
mp-849667	-1.69492	-1.69834
mp-756632	-3.11606	-3.14258
mp-29811	-1.0048	-0.980605
mp-634767	-2.43122	-2.4261
mp-1008642	0.299082	0.537247
mp-764267	-2.9779	-2.96537
mp-695984	-2.27029	-2.29882
mp-540424	-2.46501	-2.46447
mp-12463	-0.348839	-0.318521
mp-971673	-0.713556	-0.701125
mp-12789	-0.301349	-0.305394
mp-631527	0.923675	0.929526
mp-623814	-0.678188	-0.627279
mp-556804	-3.25904	-3.25045
mp-21027	-0.666559	-0.687536
mp-5528	-0.562565	-0.568055
mp-565616	-2.92787	-3.04199
mp-571664	-0.672823	-0.556204
mp-558870	-2.34857	-2.31231
mp-772744	-3.15319	-3.15869
mp-762598	-2.49138	-2.49639
mp-773389	-2.572	-2.53524
mp-20587	-2.30442	-2.47463
mp-976583	0.757478	0.80431
mp-9983	-0.778863	-0.733783
mp-10194	-1.1526	-1.20915
mp-780207	-2.03485	-2.0461
mp-767883	-2.22192	-2.24583
mp-616641	-1.1358	-1.16159
mp-6686	-2.99833	-3.01274
mp-38284	-3.83358	-3.81051
mp-767659	-1.98991	-1.98763
mp-181	-0.155198	-0.166578
mp-5766	-1.67831	-1.67376
mp-767334	-2.60508	-2.63077
mp-21872	-3.90237	-3.93567
mp-31677	-2.41825	-2.43971
mp-4156	-3.04488	-3.05764
mp-18246	-0.922644	-0.917323
mp-770595	-2.19906	-2.17994
mp-639160	-0.7223	-0.716932
mp-1020029	-1.61346	-1.4525
mp-27167	-2.02328	-2.06654
mp-8216	-3.52185	-3.54292
mp-6580	-2.60086	-2.59236
mp-759933	-2.47568	-2.48354
mp-445	-0.05147	-0.0253077
mp-767872	-2.67294	-2.673
mp-504106	-2.72535	-2.66001
mp-560001	-3.08477	-3.0765
mp-540000	-1.01093	-1.07697
mp-696655	-1.97762	-1.91832
mp-777499	-2.3301	-2.33692
mp-557724	-2.51991	-2.5446
mp-17888	-3.89641	-3.88518
mp-556778	-3.17696	-3.16271
mp-19513	-2.32388	-2.34714
mp-21141	-0.0597451	-0.0806651
mp-767432	-2.99175	-2.99222
mp-540545	-1.29919	-1.30446
mp-19255	-2.31796	-2.45091
mp-759882	-0.932829	-0.88883
mp-31954	-2.4679	-2.47847
mp-765664	-2.37612	-2.3685
mp-8673	-2.02229	-2.0232
mp-676489	-1.26193	-1.27074
mp-734123	-2.30117	-2.30758
mp-761626	-1.71018	-1.70727
mp-647606	-0.49574	-0.461929
mp-8388	-2.52329	-2.55437
mp-754556	-1.05456	-0.984499
mp-568184	-0.465526	-0.50184
mp-722913	-0.717182	-0.772141
mp-669521	-2.19645	-2.20395
mp-853141	-2.38428	-2.39032
mp-613172	-2.14125	-2.16371
mp-571258	-1.05598	-0.905045
mp-971928	0.168534	0.13751
mp-1005689	-0.200478	-0.220253
mp-29580	-1.01601	-0.988954
mp-540260	-2.60938	-2.6267
mp-25662	-1.414	-1.27813
mp-979981	-0.493192	-0.463714
mp-771916	-1.62388	-1.60275
mp-2534	-0.171558	-0.355646
mp-556932	-2.2969	-2.2658
mp-17260	-0.314498	-0.323288
mp-12657	-0.425588	-0.44338
mp-23742	-2.16483	-2.18904
mp-703515	-2.32854	-2.31154
mp-764732	-2.09707	-2.10772
mp-35530	-1.91666	-1.92348
mp-978962	0.555212	0.869938
mp-566864	-3.01913	-3.06372
mp-30177	-0.209572	-0.216686
mp-12780	-0.617474	-0.596314
mp-976876	-0.0666844	-0.0890637
mp-22846	-0.802508	-0.655458
mp-11412	-0.607293	-0.562035
mp-567602	-0.735611	-0.757196
mp-22479	-1.27136	-1.259
mp-764572	-2.44339	-2.44401
mp-25024	-2.73675	-2.74493
mp-697020	-2.66297	-2.66467
mp-997048	-0.190993	-0.202641
mp-570661	-0.570087	-0.580556
mp-19065	-3.70221	-3.73809
mp-862316	-0.629629	-0.691561
mp-555485	-3.13393	-3.14768
mp-32415	-2.62051	-2.63789
mp-2050	-1.12212	-1.11145
mp-557483	-3.53527	-3.75679
mp-558933	-2.15083	-2.15163
mp-772001	-2.30039	-2.30148
mp-570046	-1.05278	-1.11228
mp-772355	-1.22572	-1.25313
mp-769629	-2.61558	-2.60603
mp-760825	-1.84981	-1.82064
mp-780864	-2.11003	-2.06233
mp-761701	-1.46983	-1.47308
mp-8758	-0.409406	-0.298069
mp-631498	1.13954	1.32147
mp-863664	-0.467616	-0.46756
mp-1346	-0.679067	-0.810032
mp-6563	-0.379987	-0.397508
mp-31011	-0.963371	-0.979309
mp-1019279	-0.51778	-0.522685
mp-1007821	-0.120832	-0.102056
mp-770612	-1.6678	-1.67931
mp-775987	-2.74688	-2.76698
mp-568864	-1.70496	-1.71468
mp-26409	-2.73377	-2.75763
mp-763913	-2.33037	-2.35377
mp-565869	-2.77041	-2.7446
mp-760492	-1.59391	-1.42825
mp-867309	-0.702307	-0.702332
mp-566629	-2.47338	-2.49712
mp-558055	-0.858754	-0.842602
mp-27210	-2.45332	-2.51177
mp-2795	-0.714871	-0.807515
mp-631471	0.609069	0.881497
mp-31857	-2.99087	-3.08761
mp-853193	-2.38414	-2.39131
mp-2215	-0.213721	-0.264453
mp-862365	-0.665833	-0.700211
mp-540355	-2.39052	-2.38191
mp-755678	-1.50141	-1.483
mp-763762	-0.92855	-0.883261
mp-11165	-2.94294	-2.93822
mp-7108	-1.01029	-1.00176
mp-562394	-2.9775	-2.96735
mp-25545	-1.74603	-1.77863
mp-566771	-1.64897	-1.70349
mp-9055	-2.92758	-2.90183
mp-762915	-1.17694	-1.17021
mp-757673	-2.82295	-2.84442
mp-758350	-2.42295	-2.42282
mp-770347	-2.30233	-2.36409
mp-572442	-1.45577	-1.46813
mp-27703	-1.50309	-1.50281
mp-38170	-0.463291	-0.3735
mp-504570	-1.71199	-1.72705
mp-757541	-2.52444	-2.47125
mp-557320	-1.75339	-1.74436
mp-1435	-0.239483	-0.217984
mp-1020144	-2.9187	-2.89828
mp-540900	-2.23659	-2.2288
mp-775177	-2.02164	-2.02157
mp-781767	-1.61562	-1.582
mp-683616	-2.97058	-2.97269
mp-675766	-1.57729	-1.33338
mp-685138	-0.883263	-0.86335
mp-774472	-3.00066	-2.98816
mp-558610	-2.54217	-2.54262
mp-757924	-1.25628	-1.24029
mp-561207	-2.79797	-2.80242
mp-36890	-2.05162	-2.09273
mp-12275	-0.558446	-0.563515
mp-552089	-1.82916	-1.85337
mp-999390	0.0827097	0.0924871
mp-754369	-1.83819	-1.77655
mp-32431	-2.65231	-2.63811
mp-23138	-1.69004	-1.7225
mp-4896	-1.0221	-1.03895
mp-694945	-2.49476	-2.51644
mp-767151	-2.24382	-2.24303
mp-774964	-2.6332	-2.63943
mp-862364	-0.809423	-0.85278
mp-753946	-1.0349	-1.07558
mp-763897	-2.86915	-2.88025
mp-7104	-3.67128	-3.7408
mp-669471	-0.457112	-0.437769
mp-767985	-2.4037	-2.43194
mp-2513	-0.540497	-0.525295
mp-10378	-0.301854	-0.304957
mp-757840	-2.10564	-2.09028
mp-19230	-1.97799	-2.0733
mp-868647	-2.19949	-2.14147
mp-8812	-3.01063	-3.05475
mp-743583	-2.65571	-2.65102
mp-9757	-3.02411	-3.02671
mp-555575	-0.466318	-0.486324
mp-11769	-0.716194	-0.71967
mp-773887	-2.26092	-2.37286
mp-4527	-2.12606	-2.15691
mp-974613	-0.592218	-0.282547
mp-767245	-3.27251	-3.29284
mp-23909	-0.793284	-0.731694
mp-29210	-0.317436	-0.300512
mp-754960	-2.80613	-2.86986
mp-13456	-1.10408	-1.13868
mp-976828	-0.0347661	-0.0112481
mp-984744	-0.231082	-0.2171
mp-561486	-2.98683	-2.98143
mp-23358	-0.793293	-0.760903
mp-31509	-0.446769	-0.413727
mp-2011	-0.933969	-0.96182
mp-19377	-3.12612	-3.11828
mp-18433	-3.67195	-3.68655
mp-555077	-2.0198	-2.06591
mp-22961	-1.87666	-1.85812
mp-27630	-1.37278	-1.56091
mp-8578	-0.652669	-0.668775
mp-778460	-2.57171	-2.56605
mp-777563	-1.07867	-0.950287
mp-1157	-0.251357	-0.337525
mp-766143	-3.13133	-3.13722
mp-776010	-2.34165	-2.34735
mp-865536	-0.764046	-0.765938
mp-557892	-1.28173	-1.289
mp-12368	-1.96519	-1.97987
mp-524	-0.463853	-0.463169
mp-29398	-1.13897	-1.26244
mp-39995	-2.70569	-2.37536
mp-7748	-2.86855	-2.88152
mp-20506	-0.474823	-0.439259
mp-504752	-2.07327	-2.12617
mp-11550	-0.95312	-0.981719
mp-4748	-2.81744	-2.83352
mp-686909	-3.04435	-3.06447
mp-27413	-0.513942	-0.483916
mp-15826	-0.742051	-0.759634
mp-645272	-1.87683	-1.88286
mp-762358	-1.93553	-1.93838
mp-579560	-1.20816	-1.20704
mp-762906	-1.66712	-1.73903
mp-20948	-0.694003	-0.728945
mp-557071	-1.69263	-1.71938
mp-39140	-2.96859	-2.98129
mp-865527	-0.44146	-0.436769
mp-764510	-2.21552	-2.22038
mp-3612	-2.48842	-2.53832
mp-22146	-0.529096	-0.528303
mp-41109	-3.31778	-3.34508
mp-762249	-1.95355	-1.9607
mp-26541	-2.50752	-2.50834
mp-763997	-2.42172	-2.4258
mp-1640	-0.24771	-0.303145
mp-24799	-0.578128	-0.585337
mp-566764	-1.95499	-1.96174
mp-862360	-0.784022	-0.797742
mp-15704	-1.30966	-1.41395
mp-600051	-3.28868	-3.27468
mp-769980	-2.55069	-2.56585
mp-775782	-1.97328	-1.94089
mp-767035	-3.58797	-3.60429
mp-768335	-1.0575	-1.05929
mp-764618	-2.35741	-2.35714
mp-1002081	-1.69793	-1.71813
mp-4016	-0.954425	-0.970155
mp-761395	-2.54639	-2.52608
mp-540467	-2.24754	-2.23877
mp-626851	-1.51314	-1.45359
mp-776761	-2.19735	-2.20468
mp-32537	-1.6674	-1.65467
mp-776233	-2.02568	-2.03692
mp-15795	-1.67229	-1.69644
mp-21104	-0.409473	-0.379508
mp-581834	-0.610579	-0.607681
mp-14430	-2.86541	-2.86718
mp-556210	-1.68485	-1.80202
mp-1006399	-0.323483	-0.331883
mp-12879	-0.950728	-0.983964
mp-4537	-0.805678	-0.806933
mp-763550	-2.55592	-2.54592
mp-866658	-0.880497	-0.903468
mp-989584	-1.32998	-1.34904
mp-763163	-1.44587	-1.44037
mp-3151	-2.86724	-2.86878
mp-6046	-2.42215	-2.43693
mp-25003	-3.23988	-3.27547
mp-4875	-3.71325	-3.71663
mp-743780	-3.13002	-3.12228
mp-558273	-3.39495	-3.40877
mp-542678	-1.96337	-1.92315
mp-566470	-2.58185	-2.58086
mp-1020666	-2.22626	-2.13936
mp-773060	-3.46117	-3.50464
mp-23033	-1.60664	-1.66868
mp-971804	-0.0622636	-0.111993
mp-19037	-2.30606	-2.29324
mp-780172	-3.08376	-3.07076
mp-780103	-2.03013	-2.0178
mp-29008	-1.45536	-1.54104
mp-850149	-3.06917	-3.04902
mp-17679	-2.82165	-2.83615
mp-1018141	0.1823	0.179805
mp-771354	-2.67919	-2.67449
mp-32509	-2.55175	-2.55792
mp-998153	-0.666175	-0.681621
mp-1959	-3.53436	-3.62801
mp-698032	-0.410156	-0.344918
mp-850494	-1.89744	-1.83372
mp-850075	-2.43195	-2.45312
mp-862802	-1.44567	-1.50235
mp-676400	-0.862742	-0.860039
mp-765679	-1.16328	-1.14528
mp-638749	-0.444686	-0.389921
mp-771900	-2.35441	-2.34919
mp-22925	-0.305006	-0.284537
mp-19116	-2.94633	-2.97324
mp-571474	-0.710408	-0.743529
mp-2987	-0.170157	-0.19247
mp-24399	-1.70742	-1.69815
mp-32465	-2.56719	-2.57237
mp-551283	-1.47539	-1.50048
mp-765991	-2.61947	-2.6193
mp-20642	0.0326048	0.0557791
mp-559091	-3.31118	-3.28498
mp-31572	-2.27328	-2.27261
mp-30640	-0.0184959	-0.0282485
mp-11118	-1.34758	-1.36231
mp-30814	-0.498926	-0.379071
mp-974846	1.38731	1.43579
mp-780749	-1.82775	-1.83775
mp-569577	-0.594593	-0.568041
mp-541435	-1.99481	-1.96625
mp-468	-3.86978	-3.88983
mp-765814	-1.30984	-1.31564
mp-19820	-0.20346	-0.213064
mp-30419	-0.175706	-0.151851
mp-12762	-0.342483	-0.483353
mp-770345	-2.61236	-2.6014
mp-1523	-1.0394	-0.962951
mp-32061	-2.99536	-2.86373
mp-764796	-2.34734	-2.34822
mp-18474	-0.123351	-0.154308
mp-761661	-1.69548	-1.72383
mp-777554	-1.91557	-1.80585
mp-21440	-0.295501	-0.265577
mp-765042	-2.47182	-2.48969
mp-760062	-3.23144	-3.20637
mp-780553	-2.42533	-2.41988
mp-761768	-2.78066	-2.93827
mp-1013691	-0.845305	-0.839781
mp-35015	-0.601567	-0.694158
mp-754502	-3.08368	-3.20797
mp-769511	-2.38549	-2.40344
mp-642157	-1.66881	-1.57384
mp-541688	-0.926583	-0.875815
mp-15391	-1.85893	-1.89058
mp-9956	-0.0811696	-0.179931
mp-775391	-2.76852	-2.76814
mp-861978	-0.689658	-0.743532
mp-542598	-0.22702	-0.196792
mp-754658	-1.3326	-1.34304
mp-978287	0.340115	0.313294
mp-768500	-1.92859	-1.90935
mp-556009	-1.57743	-1.58933
mp-767533	-2.77558	-2.77512
mp-21002	-0.615971	-0.656784
mp-978102	-0.750798	-0.725905
mp-773906	-2.69877	-2.70126
mp-997043	-1.01834	-0.973641
mp-31134	-0.831692	-0.837848
mp-776445	-2.11005	-2.12136
mp-6820	-1.59782	-1.59524
mp-22903	-1.43828	-1.49083
mp-10481	-0.396072	-0.387829
mp-17706	-0.744644	-0.799466
mp-861665	-0.356884	-0.35831
mp-772916	-1.61492	-1.58935
mp-765554	-1.21578	-1.19376
mp-644292	-0.536382	-0.504548
mp-25526	-2.38019	-2.33104
mp-12571	-0.613215	-0.658853
mp-778713	-1.09269	-1.03872
mp-10615	-0.735556	-0.876298
mp-686908	-2.69302	-2.69475
mp-9467	-3.28657	-3.29781
mp-776731	-2.3458	-2.35186
mp-31648	-2.63304	-2.64151
mp-684031	-0.126155	-0.157976
mp-3427	-3.10949	-3.09947
mp-779985	-1.96712	-1.83107
mp-559151	-3.50202	-3.51221
mp-9953	-1.27877	-1.29846
mp-556171	-1.86018	-1.83748
mp-776649	-2.05682	-1.92709
mp-42508	-3.01885	-2.97454
mp-775983	-2.28022	-2.26804
mp-667342	-1.60093	-1.61117
mp-763382	-2.46927	-2.47799
mp-556085	-1.59239	-1.59115
mp-704703	-2.56183	-2.54894
mp-772232	-3.20138	-3.19971
mp-5503	-3.74245	-3.76299
mp-568449	-0.714113	-0.666793
mp-2721	-3.74301	-3.74137
mp-774014	-1.69538	-1.68919
mp-567486	-1.078	-1.08514
mp-764567	-2.33191	-2.332
mp-555860	-3.25131	-3.20647
mp-29976	-1.23486	-1.22855
mp-975906	-0.0694016	-0.0738083
mp-4917	-2.84127	-2.85979
mp-560671	-3.15849	-3.0977
mp-29206	-0.487769	-0.448299
mp-756086	-1.34163	-1.26772
mp-566762	-2.09867	-2.13635
mp-754596	-2.17842	-2.05766
mp-752709	-2.05845	-2.05203
mp-707343	-1.39998	-1.43551
mp-37906	-0.779289	-0.764865
mp-25759	-2.07172	-2.09248
mp-753171	-2.53554	-2.5784
mp-7976	-2.98817	-2.98586
mp-28127	-0.955629	-0.963882
mp-22052	-0.962625	-0.988395
mp-979074	-2.49876	-2.01805
mp-763543	-2.46696	-2.47654
mp-773699	-1.8686	-1.78929
mp-9880	-0.519638	-0.521753
mp-2541	-0.35892	-0.381945
mp-776187	-2.27664	-2.29091
mp-31992	-2.54482	-2.55627
mp-510728	-0.325584	-0.305756
mp-705457	-3.35142	-3.35005
mp-11356	-0.570726	-0.57042
mp-558984	-2.08939	-2.08236
mp-567975	-1.36167	-1.44352
mp-12160	-2.84812	-2.83939
mp-772296	-1.69815	-1.70024
mp-765843	-2.27988	-2.27316
mp-672966	-2.29942	-2.32651
mp-31896	-2.10047	-2.18162
mp-624190	-0.8074	-0.83347
mp-978842	-2.44536	-2.20071
mp-777021	-1.70055	-1.69854
mp-570232	-2.64584	-2.71063
mp-685108	-0.287098	-0.286172
mp-779167	-2.50125	-2.50838
mp-556936	-2.95356	-2.93172
mp-8484	-0.757107	-1.0595
mp-763803	-2.95902	-2.92287
mp-17829	-2.88898	-2.90086
mp-8507	-0.849884	-0.81072
mp-764003	-2.2547	-2.17893
mp-755417	-3.19695	-3.16747
mp-772435	-2.74341	-2.72426
mp-560016	-2.93323	-2.92476
mp-540554	-1.55491	-1.55012
mp-28235	-0.849286	-0.83714
mp-5273	-1.42124	-1.41542
mp-646397	-2.69909	-2.70107
mp-850923	-2.86343	-2.89025
mp-675784	-0.973116	-0.936317
mp-25750	-2.52914	-2.53304
mp-735063	-1.08736	-1.0808
mp-862936	-0.297622	-0.297147
mp-779090	-2.43698	-2.41726
mp-867887	-0.484292	-0.478354
mp-566620	-2.01163	-2.03669
mp-549490	-2.55157	-2.62484
mp-15382	-2.85061	-2.85558
mp-971763	0.315337	0.269093
mp-765555	-2.49727	-2.49012
mp-336	-0.0780657	-0.0897469
mp-22981	-0.860572	-0.987375
mp-1006150	0.785772	0.680847
mp-765787	-2.00345	-2.01556
mp-765240	-2.9705	-2.91645
mp-1019532	-3.42349	-3.44347
mp-505789	-0.853427	-0.867713
mp-10597	-0.0296915	0.00873961
mp-755537	-3.95899	-4.00974
mp-30801	-0.285981	-0.296813
mp-556244	-0.896588	-0.881763
mp-20991	-2.12404	-2.1263
mp-779765	-2.48469	-2.48193
mp-763474	-2.46142	-2.45903
mp-867122	-0.231713	-0.249343
mp-1020022	-2.76058	-2.76378
mp-780522	-2.04832	-2.038
mp-764229	-2.68532	-2.70183
mp-759287	-1.88275	-1.8592
mp-771351	-2.1227	-2.09756
mp-999192	-0.450149	-0.453807
mp-641534	-1.35519	-1.36111
mp-17704	-3.84076	-3.84939
mp-685257	-1.45762	-1.40646
mp-773297	-2.83575	-2.90675
mp-568646	-0.365514	-0.439363
mp-20310	-0.856298	-0.872033
mp-780440	-2.44982	-2.42557
mp-972411	0.0758255	0.0939185
mp-558951	-2.64021	-2.63151
mp-541111	-1.74154	-1.68496
mp-9308	-3.49241	-3.54284
mp-19396	-1.79377	-1.80228
mp-25686	-2.44682	-2.42658
mp-975073	-0.635589	-0.637114
mp-774883	-0.791405	-0.819907
mp-850746	-2.33147	-2.32117
mp-853230	-2.21991	-2.2203
mp-862445	-0.450308	-0.554263
mp-626014	-1.08429	-1.03437
mp-19750	-3.02438	-3.02898
mp-8204	-0.138313	-0.168146
mp-849438	-2.52258	-2.48588
mp-1017983	-0.205504	-0.134256
mp-88	0.00469974	0.00848817
mp-541416	-2.54201	-2.5117
mp-759786	-3.33553	-3.34902
mp-541597	-2.70671	-2.78794
mp-680417	-1.41707	-1.41876
mp-978536	-0.47547	-0.470722
mp-555844	-0.957381	-0.956431
mp-557655	-1.76521	-1.81729
mp-684690	-1.50516	-1.67632
mp-541183	-0.633839	-0.602871
mp-777255	-2.36724	-2.3627
mp-776803	-2.89287	-2.85807
mp-744463	-2.46066	-2.4853
mp-866637	-1.01788	-1.02448
mp-777719	-2.80946	-2.80049
mp-17750	-3.24246	-3.23198
mp-753708	-3.45344	-3.44222
mp-28705	-0.573599	-0.619479
mp-853187	-2.77082	-2.72995
mp-555268	-2.50285	-2.50432
mp-772157	-3.01322	-2.99435
mp-762163	-2.5	-2.48622
mp-752549	-2.13197	-2.18412
mp-6644	-2.86852	-2.8833
mp-753299	-2.16229	-2.12006
mp-863856	-2.21849	-2.1866
mp-770103	-2.79698	-2.76679
mp-556185	-2.79389	-2.78295
mp-767756	-1.96041	-1.98195
mp-764	-0.127948	-0.105673
mp-4950	-3.67069	-3.71906
mp-9799	-1.88256	-1.95125
mp-764677	-2.32607	-2.32451
mp-763100	-2.83178	-2.88681
mp-772587	-3.00714	-3.0019
mp-774910	-1.55544	-1.56251
mp-9612	-2.44237	-2.46633
mp-560905	-2.05209	-2.06876
mp-776344	-2.2294	-2.28972
mp-7099	-0.448147	-0.41381
mp-26591	-2.78399	-2.78662
mp-849699	-2.60597	-2.56726
mp-504848	-1.44487	-1.43668
mp-158	0.0333812	0.0134372
mp-16825	-3.11583	-3.16169
mp-752888	-2.3583	-2.32827
mp-776740	-2.16567	-2.15148
mp-756690	-2.07587	-2.13707
mp-653560	-3.64785	-3.66856
mp-9873	-0.524493	-0.563061
mp-29787	-2.33724	-2.32471
mp-850771	-2.50194	-2.50768
mp-867955	-2.62895	-2.66781
mp-31317	-1.14682	-1.15826
mp-616204	-1.49798	-1.45917
mp-773608	-1.74806	-1.75333
mp-542302	-0.714777	-0.712756
mp-771091	-1.83736	-1.85606
mp-4007	-0.822205	-0.811598
mp-8181	-1.116	-1.13318
mp-864878	-0.548594	-0.537384
mp-769744	-2.22264	-2.2371
mp-510098	-0.43693	-0.410406
mp-30424	-0.195771	-0.153746
mp-14824	-2.08438	-2.08942
mp-695694	-0.535746	-0.65462
mp-21412	-0.0695406	-0.120943
mp-1111	-0.315009	-0.348581
mp-18917	-1.77959	-1.79719
mp-19463	-2.41046	-2.41245
mp-772489	-3.31577	-3.30156
mp-37478	-2.31101	-2.32916
mp-5181	-0.897699	-0.902078
mp-675716	-3.658	-3.63884
mp-17057	-2.25772	-2.22887
mp-6123	-2.88216	-2.83673
mp-123	0.0109018	0
mp-1534	-2.27913	-2.32719
mp-560466	-2.62208	-2.61978
mp-543108	-1.98353	-1.96114
mp-28855	-2.32749	-2.31899
mp-31849	-2.5392	-2.55074
mp-9634	-1.06115	-1.08201
mp-849354	-2.68759	-2.71358
mp-1136	-0.400462	-0.404565
mp-568430	-0.187988	-0.0720945
mp-782697	-1.76046	-1.73996
mp-777669	-2.92939	-2.9201
mp-975933	-0.466223	-0.463699
mp-758571	-3.28568	-3.32737
mp-550086	-2.01279	-1.98609
mp-768292	-2.26717	-2.24548
mp-673669	-2.0322	-2.03146
mp-676210	-1.91105	-1.85708
mp-4596	-2.50308	-2.49514
mp-757149	-3.96234	-3.95762
mp-647822	-0.387448	-0.324565
mp-486	-0.351484	-0.359562
mp-676799	-0.0430757	-0.0309895
mp-770850	-2.24711	-2.24265
mp-505113	-2.80424	-2.85639
mp-765768	-2.23684	-2.21809
mp-867267	-0.723047	-0.68195
mp-2121	-0.370858	-0.45129
mp-28950	-0.707112	-0.807568
mp-690799	-0.511746	-0.557423
mp-761676	-1.70632	-1.77836
mp-11456	-0.998171	-1.09667
mp-16684	-1.68136	-1.70771
mp-8581	-0.957427	-0.942397
mp-685995	-2.86487	-2.89504
mp-3719	-1.50119	-1.55504
mp-1009213	0.457006	0.426356
mp-540830	-2.03444	-2.06654
mp-28278	-0.748327	-0.754991
mp-2828	-1.94613	-1.94027
mp-764162	-2.63288	-2.62526
mp-778833	-1.67778	-1.63787
mp-777872	-1.57845	-1.65598
mp-571293	-0.906682	-0.888621
mp-26675	-2.50219	-2.50933
mp-20694	-1.5911	-1.58482
mp-626225	-1.46176	-1.45289
mp-744193	-1.80939	-1.81579
mp-772170	-1.53683	-1.51722
mp-849364	-1.90435	-1.84968
mp-620372	-0.604895	-0.572215
mp-22670	-0.991778	-0.992991
mp-972062	-0.550742	-0.553443
mp-763506	-2.31151	-2.47485
mp-766348	-1.65192	-1.66213
mp-777425	-2.35681	-2.36024
mp-566229	-2.31301	-2.28586
mp-8537	-2.02713	-2.13352
mp-9712	-2.5574	-2.50645
mp-2137	-0.151422	-0.171851
mp-542781	-0.147511	-0.107577
mp-781049	-3.12793	-3.14032
mp-866668	-0.970214	-1.10926
mp-11327	-0.950161	-1.02807
mp-770023	-0.00385565	0.0747329
mp-754208	-2.95677	-2.96734
mp-569344	-0.792249	-0.804891
mp-697683	-1.03935	-1.03782
mp-8869	-2.9994	-3.02637
mp-559346	-3.00531	-3.01006
mp-12826	-0.0518257	-0.0542691
mp-757981	-1.99183	-2.00405
mp-775565	-2.2412	-2.24113
mp-23283	-0.775281	-0.799964
mp-10298	-1.08506	-1.11142
mp-758223	-1.75803	-1.70014
mp-767747	-2.78267	-2.77765
mp-31832	-2.50768	-2.53535
mp-867821	-0.236525	-0.275247
mp-31312	-0.36759	-0.343178
mp-774387	-3.13548	-3.14004
mp-2883	-2.99694	-3.02116
mp-868321	-2.33148	-2.34181
mp-4547	-3.26695	-3.32071
mp-558318	-3.14935	-3.15834
mp-32791	-0.205337	-0.192303
mp-23958	-1.6551	-1.64693
mp-4878	-1.0302	-1.03454
mp-557012	-2.99053	-2.96656
mp-12022	-2.47846	-2.43193
mp-562920	-3.22111	-3.26255
mp-722316	-1.20259	-1.21355
mp-773354	-1.77673	-1.75163
mp-18150	-3.02484	-3.02519
mp-765191	-1.94694	-1.93931
mp-540447	-2.43549	-2.44615
mp-18071	-1.28174	-1.28574
mp-19323	-3.20248	-3.20972
mp-541595	-0.187179	-0.140807
mp-644246	-0.536216	-0.604483
mp-979910	-0.240709	-0.276682
mp-21835	-0.305794	-0.360017
mp-667372	-3.04806	-3.00954
mp-21278	-0.530158	-0.501667
mp-677222	-3.54776	-3.55994
mp-570425	-0.327802	-0.325307
mp-631302	0.570214	0.675702
mp-770959	-2.81812	-2.84483
mp-28487	-0.0457731	-0.0502401
mp-2323	-0.124105	-0.0976105
mp-995226	-0.713663	-0.698682
mp-773030	-2.94958	-2.89963
mp-763441	-1.69213	-1.71533
mp-779072	-2.42342	-2.43988
mp-1017519	1.42368	1.68396
mp-1014212	0.147581	0.540979
mp-754152	-2.67347	-2.77706
mp-3704	-0.718896	-0.732649
mp-767724	-2.44328	-2.44392
mp-569788	-0.258213	-0.242384
mp-1008376	-0.585381	-0.578496
mp-9318	-1.12087	-1.12221
mp-556374	-2.168	-2.18629
mp-866216	-0.625875	-0.621118
mp-22089	-1.16217	-1.21283
mp-850292	-1.95889	-1.95399
mp-540704	-2.21331	-2.20124
mp-30171	-0.629617	-0.652603
mp-26312	-2.49309	-2.48161
mp-850277	-1.66794	-1.64545
mp-972439	-2.37166	-2.35095
mp-583234	-0.085524	-0.0870789
mp-25694	-2.6051	-2.63956
mp-1098	-1.04033	-1.17345
mp-568522	-0.45744	-0.479043
mp-510595	-0.674281	-0.70016
mp-15694	-1.16585	-1.06075
mp-759713	-3.25429	-3.26811
mp-976972	-0.272078	-0.271101
mp-775993	-2.58772	-2.57563
mp-20496	-2.11198	-2.08896
mp-31583	-2.5259	-2.52658
mp-761979	-2.38471	-2.34342
mp-755950	-3.58026	-3.52508
mp-685120	-0.883896	-0.817992
mp-32532	-2.11618	-2.19914
mp-754751	-2.62443	-2.60204
mp-1006056	-0.483047	-0.40721
mp-706657	-2.6448	-2.64912
mp-756951	-1.94604	-2.09931
mp-778868	-2.13841	-2.11771
mp-1018067	0.0998982	0.0651748
mp-980052	-0.271419	-0.232755
mp-707311	-1.96655	-1.96403
mp-770901	-2.00063	-2.01925
mp-39387	-3.40339	-3.43349
mp-770335	-2.59144	-2.51119
mp-1018156	-0.080371	-0.0633892
mp-558083	-3.39611	-3.41294
mp-20799	-0.411338	-0.449442
mp-643458	-2.09717	-2.07214
mp-866171	-0.779421	-0.778966
mp-16794	-0.62353	-0.642238
mp-555296	-3.24873	-3.22683
mp-780091	-1.94206	-1.96691
mp-780007	-1.97259	-1.96479
mp-865795	-0.367241	-0.366506
mp-761493	-1.92773	-1.93038
mp-765777	-2.5323	-2.53643
mp-20599	-0.207443	-0.218012
mp-972486	0.185698	0.233225
mp-1121	-0.289207	-0.279043
mp-652663	-0.820969	-0.821746
mp-705842	-1.64514	-1.59224
mp-769280	-3.43416	-3.42773
mp-770642	-2.5199	-2.47749
mp-8978	-0.960271	-0.924034
mp-5193	-2.19899	-2.17983
mp-9719	-0.563167	-0.632115
mp-771334	-2.25507	-2.18624
mp-565482	-1.87892	-1.8829
mp-765718	-2.23212	-2.26476
mp-769884	-1.70584	-1.72124
mp-24006	-1.26103	-1.26633
mp-568936	-0.050042	-0.0714085
mp-1013706	-0.452408	-0.484128
mp-27523	-1.30831	-1.33924
mp-770680	-2.22307	-2.21097
mp-764627	-2.11756	-2.1328
mp-7564	-0.445827	-0.455811
mp-12360	-0.0583304	-0.0881081
mp-765529	-1.96406	-1.93221
mp-14132	-3.73961	-3.74465
mp-13094	-0.657376	-0.64792
mp-1343	-0.338396	-0.311484
mp-676013	-1.48286	-1.4681
mp-21079	-0.659184	-0.657706
mp-504678	-1.18328	-1.26659
mp-675509	-1.9188	-1.8324
mp-10856	-0.431693	-0.442705
mp-754903	-3.19738	-3.17668
mp-770048	-2.35414	-2.39406
mp-3183	-0.779089	-0.806365
mp-7973	-2.9033	-2.91066
mp-698365	-1.15337	-1.12549
mp-556303	-1.36562	-1.37721
mp-510085	-0.828715	-0.817597
mp-29070	-1.77991	-1.69218
mp-761698	-1.60512	-1.47326
mp-972471	0.0182987	0.0164184
mp-769919	-1.66737	-1.72619
mp-16481	-0.544998	-0.495379
mp-757652	-1.27664	-1.29348
mp-39770	-2.625	-2.64877
mp-29151	-1.27053	-1.29272
mp-755260	-2.34892	-2.37808
mp-767352	-2.04873	-2.09562
mp-985829	-1.74314	-2.02498
mp-866690	-1.56465	-1.57487
mp-1018792	-2.07859	-2.05262
mp-541201	-1.88082	-1.9321
mp-771665	-1.76801	-1.76746
mp-556908	-2.88496	-2.88274
mp-541629	-3.5403	-3.54038
mp-32332	-2.07446	-2.06741
mp-27971	-2.83194	-2.92415
mp-760729	-2.65914	-2.69107
mp-565930	-2.96629	-2.98645
mp-767641	-3.15649	-3.13917
mp-4194	-1.0739	-1.1302
mp-743528	-0.94242	-0.92972
mp-774369	-2.3651	-2.38234
mp-643941	-2.67727	-2.67748
mp-764729	-2.36656	-2.35336
mp-18690	-4.29325	-4.25956
mp-13944	-0.993398	-0.975172
mp-4835	-0.625789	-0.618667
mp-764013	-2.29837	-2.29723
mp-861734	-0.567809	-0.532274
mp-755445	-2.31737	-2.3076
mp-530800	-3.78892	-3.80421
mp-570138	-0.613545	-0.63566
mp-571144	-1.40386	-1.38945
mp-851039	-2.20023	-2.19522
mp-1017447	-1.21622	-1.19421
mp-974335	0.105804	0.0516604
mp-36052	-1.98108	-1.91481
mp-866613	-2.9379	-2.90443
mp-777710	-2.96348	-2.94913
mp-4789	-2.46428	-2.49462
mp-16956	-3.08726	-3.09305
mp-25582	-2.11889	-2.11821
mp-735520	-2.2735	-2.17523
mp-2981	-2.38639	-2.41835
mp-998610	-0.971756	-0.998707
mp-636225	-2.5891	-2.58873
mp-546321	-2.66947	-2.78241
mp-31803	-1.77592	-1.78906
mp-569410	-1.07865	-1.06083
mp-25590	-2.29764	-2.31325
mp-560	-0.844232	-0.886879
mp-763959	-2.04913	-1.96981
mp-773069	-3.52549	-3.51718
mp-764651	-2.35872	-2.24104
mp-763123	-2.21182	-2.20994
mp-1018819	-0.309719	-0.333201
mp-645	-1.582	-1.61374
mp-9753	-3.28619	-3.21312
mp-505572	-0.112167	-0.182748
mp-571163	-0.283972	-0.30057
mp-31692	-2.30911	-2.3836
mp-754555	-2.71748	-2.74623
mp-866936	-1.40614	-1.2758
mp-977562	-0.636764	-0.642555
mp-9195	-2.16095	-2.12828
mp-5175	-2.03886	-1.99865
mp-542915	-0.35632	-0.39565
mp-972912	0.0197244	0.0164407
mp-766387	-3.37043	-3.39478
mp-566150	-2.15463	-2.17557
mp-756460	-1.70392	-1.756
mp-600941	-1.83986	-1.80614
mp-695887	-2.33566	-2.34197
mp-743846	-1.9713	-1.97152
mp-771634	-2.23583	-2.18983
mp-1020010	-0.924759	-0.667974
mp-777151	-2.77557	-2.79869
mp-653823	-1.09577	-1.08108
mp-866015	-0.298888	-0.300274
mp-31380	-0.788734	-0.857663
mp-705454	-1.14292	-0.939996
mp-771338	-3.15325	-3.18492
mp-19827	-1.04825	-1.01913
mp-626496	-2.1045	-2.11519
mp-565301	-2.49342	-2.49142
mp-1013987	-1.87546	-1.85904
mp-973265	0.951424	0.979361
mp-556525	-2.97095	-2.99229
mp-763638	-2.51637	-2.51072
mp-567334	-0.887057	-0.943461
mp-19123	-2.37924	-2.37332
mp-756930	-3.00806	-3.02721
mp-32642	-2.3647	-2.38484
mp-8886	-0.308243	-0.286966
mp-8121	-0.647365	-0.641907
mp-7880	-0.32179	-0.297163
mp-999083	-0.119625	-0.0851141
mp-768030	-2.21022	-2.20702
mp-774377	-2.49815	-2.49833
mp-572271	-2.61894	-2.60154
mp-773049	-2.84667	-2.78198
mp-6628	-1.16116	-1.15654
mp-6712	-2.92613	-2.92222
mp-28122	-2.49857	-2.49643
mp-27258	-0.0445379	-0.111137
mp-568539	-0.709703	-0.740007
mp-673247	-3.77032	-3.282
mp-24914	-2.5966	-2.55912
mp-972600	-2.35922	-2.36911
mp-569813	-0.294381	-0.306107
mp-557626	-3.81396	-3.84651
mp-504670	-0.574702	-0.570122
mp-767929	-2.82581	-2.84544
mp-547521	-2.58045	-2.5733
mp-778757	-1.47628	-1.53221
mp-761324	-2.19217	-2.17831
mp-999208	-0.288731	-0.27982
mp-2576	-0.541365	-0.537811
mp-961651	-0.73829	-0.537984
mp-17709	-2.49389	-2.49903
mp-560226	-3.30017	-3.30497
mp-735519	-3.02891	-2.96034
mp-19987	-0.641282	-0.529589
mp-19219	-2.51783	-2.51786
mp-775082	-1.9477	-1.96331
mp-6127	-3.05632	-3.02931
mp-20205	-2.16099	-2.24867
mp-553990	-1.51316	-1.47471
mp-767427	-2.35941	-2.3628
mp-757514	-2.4921	-2.47806
mp-770941	-2.31689	-2.33915
mp-776713	-2.48025	-2.4777
mp-759544	-1.48399	-1.48584
mp-1990	-0.458555	-0.627894
mp-764361	-2.90684	-2.91527
mp-756009	-1.1261	-1.131
mp-775732	-1.87616	-1.93241
mp-766905	-2.97216	-2.97328
mp-849394	-2.66706	-2.70276
mp-19731	-0.52841	-0.558396
mp-25696	-2.01795	-2.01099
mp-10394	-0.156653	-0.0853586
mp-764737	-2.6714	-2.65701
mp-560601	-1.95275	-1.96493
mp-1827	-0.346911	-0.416697
mp-855	0.00198632	-0.00908811
mp-13302	-0.765695	-0.75088
mp-777707	-2.37727	-2.37815
mp-771203	-2.25584	-2.3305
mp-566991	-2.69347	-2.70253
mp-850500	-2.39736	-2.44903
mp-9277	-1.4395	-1.45403
mp-570930	-0.404859	-0.45791
mp-22618	-2.08325	-2.07925
mp-9545	-0.289292	-0.272344
mp-23598	-1.60104	-1.62701
mp-540838	-2.37191	-2.28438
mp-697856	-2.86799	-2.86845
mp-582767	-1.92961	-1.95079
mp-763363	-2.46373	-2.41286
mp-763099	-2.61551	-2.61982
mp-5221	-0.562856	-0.574396
mp-782818	-2.6892	-2.68105
mp-769729	-1.81725	-1.81963
mp-558740	-1.79695	-1.82275
mp-10343	-0.490753	-0.570954
mp-540208	-2.54645	-2.51441
mp-4964	-1.13473	-1.2181
mp-10428	-0.167494	-0.127014
mp-23801	-1.61178	-1.54426
mp-1019549	-3.27934	-3.31827
mp-36234	-1.29834	-1.41923
mp-11037	-0.402964	-0.423699
mp-565886	-2.10802	-2.11185
mp-766163	-2.14391	-2.25515
mp-3726	-0.603195	-0.664063
mp-761590	-2.21103	-2.21555
mp-560223	-2.03317	-1.99278
mp-561902	-0.604305	-0.60929
mp-30594	0.0244186	-0.0709785
mp-18747	-2.57707	-2.5984
mp-540855	-0.282589	-0.487168
mp-1786	-0.283274	-0.350936
mp-767906	-2.52365	-2.51677
mp-863377	-2.51652	-2.50568
mp-1253	-1.83777	-2.04812
mp-13541	-3.16575	-3.20695
mp-30537	-2.86024	-2.84645
mp-20689	-0.60323	-0.625187
mp-779854	-2.50679	-2.50764
mp-764053	-2.89255	-2.88332
mp-568545	-0.34209	-0.339521
mp-866972	-1.57697	-1.58516
mp-977559	-0.760181	-0.771115
mp-567957	-0.344009	-0.363653
mp-16234	-0.441243	-0.436696
mp-998241	-2.5227	-2.52583
mp-765818	-1.3673	-1.36551
mp-35539	-0.459741	-0.507664
mp-973920	-3.09578	-2.70645
mp-7221	-0.590862	-0.502653
mp-770155	-2.5807	-2.58987
mp-556137	-3.31483	-3.32326
mp-866660	-0.570379	-0.563121
mp-19284	-0.721816	-0.678842
mp-774093	-2.36722	-2.38051
mp-769626	-2.40657	-2.34808
mp-2719	-0.559409	-0.600036
mp-632402	-3.81899	-3.83365
mp-4487	-0.47176	-0.469877
mp-12533	-4.00918	-4.06599
mp-978695	-0.950751	-0.956034
mp-27607	-0.27261	-0.263756
mp-763082	-1.95403	-1.95325
mp-10347	-3.31054	-3.34397
mp-650178	-1.00804	-1.02288
mp-21628	-0.194929	-0.220456
mp-569161	-1.41621	-1.37352
mp-864734	-0.684295	-0.693325
mp-28489	-0.997699	-0.913228
mp-765828	-1.94687	-2.01819
mp-2954	-0.572606	-0.552481
mp-778794	-2.1468	-2.13877
mp-27834	-1.16865	-1.17224
mp-777056	-2.50688	-2.49643
mp-973109	-0.660212	-0.652368
mp-505807	-0.162354	-0.174995
mp-11571	-0.457189	-0.417
mp-755512	-3.68149	-3.70535
mp-565583	-3.33985	-3.3432
mp-765139	-2.62437	-2.61313
mp-567722	-1.34078	-1.35908
mp-1008926	-0.0467939	0.11738
mp-34296	-1.83764	-1.84749
mp-39888	-2.57015	-2.56123
mp-763557	-2.37203	-2.34849
mp-771994	-1.12674	-1.14188
mp-625548	-1.39205	-1.38475
mp-541168	-2.95822	-2.94154
mp-775402	-1.08493	-1.10413
mp-225	-0.275858	-0.262028
mp-567597	0.0171381	0.0608161
mp-779269	-2.64763	-2.6443
mp-1007918	-0.87544	-0.88611
mp-12286	-3.50623	-3.52504
mp-764834	-1.63787	-1.595
mp-567248	-0.431559	-0.426533
mp-13378	-0.731974	-0.731765
mp-1018083	-0.220112	-0.138448
mp-24091	-1.87895	-1.87713
mp-680944	-3.04978	-3.05792
mp-6027	-1.82003	-1.79943
mp-755446	-2.17456	-2.08322
mp-1719	-1.42631	-1.43797
mp-743873	-2.84121	-2.84009
mp-763584	-2.35197	-2.36917
mp-29096	-0.519465	-0.510661
mp-28085	-2.59767	-2.65038
mp-721943	-1.87834	-1.86346
mp-763827	-2.56184	-2.51672
mp-27779	-1.26878	-1.2826
mp-20151	-0.371877	-0.423065
mp-705514	-0.67733	-0.699689
mp-704198	-2.47486	-2.46078
mp-775778	-2.81957	-2.82173
mp-674352	-0.519805	-0.513402
mp-505815	-1.59464	-1.59091
mp-762382	-2.4955	-2.4708
mp-771423	-2.20412	-2.2299
mp-35889	-1.47152	-0.962437
mp-973633	-0.679192	-0.793301
mp-676349	-0.4915	-0.504218
mp-1675	-0.758967	-0.780842
mp-771904	-2.2127	-2.18298
mp-27064	-2.21395	-2.20195
mp-765853	-2.84415	-2.87432
mp-19833	-0.740694	-0.762356
mp-698728	-1.92366	-1.67302
mp-4555	-2.23331	-2.2537
mp-556489	-2.97818	-3.00893
mp-776091	-3.0798	-3.05387
mp-762693	-2.28442	-2.29778
mp-20906	-0.33296	-0.328218
mp-778071	-4.28741	-4.28986
mp-557844	-3.04544	-3.02867
mp-972272	-0.718038	-0.719312
mp-16599	-2.85458	-2.86104
mp-761254	-2.51391	-2.52173
mp-636105	-0.140592	-0.0944834
mp-542220	-0.316998	-0.231446
mp-10895	-0.275778	-0.314064
mp-557989	-2.00368	-1.99551
mp-674366	-2.78099	-2.7599
mp-505139	-2.28921	-2.27604
mp-685168	-3.54742	-3.45669
mp-775116	-2.52555	-2.53751
mp-865848	-0.331841	-0.331109
mp-510374	-1.47159	-1.53677
mp-978853	-0.604279	-0.643284
mp-2619	-0.152781	0.0217654
mp-4041	-0.412323	-0.434275
mp-19865	-0.440834	-0.421764
mp-774048	-2.5633	-2.57743
mp-540440	-2.27579	-2.26473
mp-779798	-2.23776	-2.21937
mp-1527	-0.256701	-0.265265
mp-771872	-2.04095	-2.0451
mp-3777	-1.31936	-1.317
mp-10950	-2.90565	-2.90205
mp-173	-0.159831	-0.170753
mp-767701	-2.48993	-2.49518
mp-1017982	0.760234	0.724664
mp-776049	-2.44686	-2.45794
mp-999540	-0.446889	-0.360264
mp-780147	-2.57416	-2.5836
mp-24044	-1.50253	-1.47803
mp-554475	-3.2662	-3.22354
mp-771064	-2.42042	-2.42112
mp-567401	-0.558606	-0.477354
mp-13536	-0.469474	-0.452167
mp-776001	-2.46063	-2.49086
mp-11666	-0.427268	-0.417969
mp-1002124	-0.239935	-0.301016
mp-755018	-3.01654	-2.99488
mp-775647	-2.09438	-2.09353
mp-765454	-2.49743	-2.45746
mp-975216	-1.99925	-1.99623
mp-738629	-1.57201	-1.60061
mp-19416	-3.06629	-3.08159
mp-555717	-2.45878	-2.48859
mp-997008	-0.840554	-0.78539
mp-705332	-2.36688	-2.37873
mp-765969	-2.23421	-2.21963
mp-989565	-2.84035	-2.84648
mp-7499	-0.73324	-0.761783
mp-776115	-2.23191	-2.27762
mp-771213	-2.61185	-2.61471
mp-555884	-2.01123	-2.01171
mp-999068	-0.119941	-0.104204
mp-570403	-0.30644	-0.288576
mp-637201	-2.35083	-2.30952
mp-755543	-3.05064	-3.04937
mp-12778	-0.374883	-0.236019
mp-971826	0.188313	0.418425
mp-972510	-0.840782	-0.838612
mp-558056	-3.14159	-3.13195
mp-7109	-1.01922	-0.978247
mp-31347	-0.745221	-0.748688
mp-777495	-2.67965	-2.68228
mp-6565	-3.1346	-3.14154
mp-669326	-0.589113	-0.590579
mp-697111	-1.1775	-1.39311
mp-770171	-2.67892	-2.67795
mp-559614	-2.56528	-2.58026
mp-770702	-2.49396	-2.48582
mp-6507	-2.56311	-2.59241
mp-3797	-1.1882	-1.20624
mp-41734	-3.04579	-3.04934
mp-514	-0.255705	-0.209845
mp-771534	-2.23615	-2.23196
mp-630820	-0.535712	-0.551392
mp-649033	-0.770068	-0.802948
mp-763439	-3.19879	-3.21476
mp-25017	-2.66026	-2.66693
mp-7792	-2.3943	-2.38762
mp-30717	-0.277257	-0.271518
mp-672273	-1.68831	-1.69703
mp-773165	-1.50645	-1.51543
mp-772258	-2.63787	-2.66265
mp-12689	-0.886576	-0.881788
mp-5476	-3.44112	-3.43877
mp-36252	-1.63127	-1.63606
mp-684024	-1.08157	-1.1172
mp-972117	-2.41017	-2.39754
mp-542675	-1.35888	-1.40836
mp-25405	-2.2111	-2.16944
mp-642804	-2.02361	-2.04478
mp-25485	-1.90283	-1.89699
mp-752666	-1.85739	-1.86232
mp-770337	-2.29711	-2.28957
mp-849685	-1.41572	-1.39787
mp-4865	-0.666495	-0.675743
mp-12146	-3.54754	-3.5408
mp-2250	-0.428769	-0.410028
mp-557035	-2.47298	-2.51345
mp-774121	-2.44752	-2.45749
mp-951	-0.71096	-0.72387
mp-19249	-1.93654	-1.89331
mp-753823	-4.24377	-4.27608
mp-640859	-1.85675	-1.85859
mp-759735	-2.57406	-2.5395
mp-622491	-1.3499	-1.38085
mp-705002	-2.63369	-2.64186
mp-771353	-2.56879	-2.54738
mp-643564	-1.84744	-1.85004
mp-557450	-1.54602	-1.5076
mp-15551	-0.430374	-0.443354
mp-550579	-2.74201	-2.78952
mp-569486	-0.311517	-0.30103
mp-25612	-2.26303	-2.26058
mp-15362	-3.11175	-3.10673
mp-541753	-1.12428	-1.11602
mp-1739	-0.684324	-0.678929
mp-8540	-0.364133	-0.27694
mp-764812	-2.81842	-2.85309
mp-32373	-2.29574	-2.31725
mp-763490	-2.82564	-2.82378
mp-755010	-2.56811	-2.33608
mp-680671	-0.0886549	-0.126834
mp-29375	-1.28725	-1.25999
mp-17677	-3.03624	-3.03215
mp-754540	-1.12521	-1.15979
mp-27980	-3.67752	-3.69074
mp-12631	-2.44748	-2.4782
mp-7664	-1.52711	-1.55411
mp-18612	-1.30571	-1.32518
mp-780115	-2.59214	-2.57509
mp-774309	-2.66822	-2.66814
mp-775125	-2.5285	-2.52831
mp-767081	-2.06581	-2.08357
mp-759381	-2.4594	-2.49725
mp-772610	-2.02276	-2.02314
mp-767355	-2.07515	-2.1273
mp-753802	-3.72949	-3.74836
mp-769813	-2.51014	-2.52218
mp-16622	-0.509977	-0.520827
mp-4066	-2.19545	-2.20812
mp-868564	-1.90402	-1.83682
mp-542926	-2.99298	-3.03926
mp-24131	-0.748181	-0.68858
mp-10889	-0.150109	-0.189959
mp-763718	-2.78099	-2.78433
mp-763057	-1.33395	-1.34112
mp-539	-1.01516	-1.06193
mp-623088	-3.53544	-3.491
mp-773242	-2.28655	-2.28526
mp-761563	-1.88151	-1.86439
mp-15438	-2.50074	-2.50117
mp-573498	-0.352982	-0.374516
mp-24589	-1.66022	-1.67592
mp-1019525	-3.06059	-3.03527
mp-12108	-0.465812	-0.554891
mp-973981	-3.14615	-3.19012
mp-767900	-2.66948	-2.6557
mp-17434	-3.78524	-3.75999
mp-21901	-0.339476	-0.331894
mp-996962	-0.985883	-1.12127
mp-557019	-2.4081	-2.43655
mp-540832	-2.46299	-2.53692
mp-32884	-0.249867	-0.274491
mp-705083	-2.06096	-2.05901
mp-559955	-1.91142	-1.88759
mp-754833	-2.50036	-2.47828
mp-14015	0.000380009	-0.00680364
mp-24831	-1.4211	-1.46768
mp-582389	-0.328868	-0.393237
mp-675751	-3.41525	-3.42308
mp-559610	-2.93158	-2.94084
mp-19956	-2.8637	-2.8843
mp-23261	-0.741363	-0.776406
mp-556339	-1.02768	-1.07482
mp-14763	-1.01912	-1.03127
mp-604459	-2.37591	-2.3652
mp-567141	-1.75267	-1.71915
mp-775022	-2.21251	-2.34325
mp-774714	-2.54528	-2.54145
mp-505702	-1.72806	-1.74066
mp-764713	-2.4965	-2.51933
mp-19581	-2.94279	-2.9772
mp-776038	-2.81665	-2.85779
mp-782053	-2.81313	-2.84282
mp-753524	-2.00712	-2.04685
mp-7638	-3.31642	-3.27709
mp-865427	-2.80415	-2.80347
mp-19496	-2.2607	-2.2598
mp-763436	-2.16596	-2.19953
mp-998988	-0.23097	-0.18946
mp-775753	-2.48346	-2.49628
mp-16988	-1.10464	-1.11091
mp-726	-1.09113	-1.17175
mp-672223	-1.69338	-1.49168
mp-29806	-0.824266	-0.786987
mp-767621	-2.42497	-2.44998
mp-16356	-0.665818	-0.676291
mp-773719	-1.74527	-1.82409
mp-771986	-1.90824	-1.81072
mp-961650	0.222973	0.375707
mp-542879	-0.304492	-0.308265
mp-864889	-0.262146	-0.280297
mp-24151	-0.75625	-0.786642
mp-755920	-3.02781	-3.08338
mp-759790	0.0818831	0.0635746
mp-24927	-1.73913	-2.02131
mp-779689	-0.551087	-0.519317
mp-554227	-2.50433	-2.51165
mp-764455	-2.22434	-2.25039
mp-758841	-1.90715	-1.88294
mp-555005	-2.82871	-2.81611
mp-36699	-3.94968	-3.92881
mp-756452	-3.88346	-3.88214
mp-775715	-2.09939	-2.10363
mp-775628	-2.75613	-2.74695
mp-762264	-2.48791	-2.45993
mp-28708	-2.40316	-2.31753
mp-694892	-2.88039	-2.90915
mp-735589	-2.76559	-2.75693
mp-371	-0.225521	-0.245337
mp-5380	-1.79543	-1.77922
mp-557748	-1.99422	-1.9451
mp-677217	-1.12477	-1.12622
mp-557668	-2.20141	-2.21819
mp-764943	-2.31885	-2.30856
mp-773247	-1.60451	-1.58985
mp-961666	0.270781	0.392545
mp-780123	-2.41254	-2.4194
mp-770667	-2.25382	-2.23869
mp-776184	-2.14745	-2.10644
mp-866117	-0.429314	-0.436073
mp-950217	-0.422011	-0.262991
mp-771668	-2.45175	-2.36435
mp-759198	-2.43409	-2.45054
mp-972914	-0.339127	-0.361647
mp-849474	-1.76652	-1.75013
mp-867215	-0.371174	-0.438382
mp-1016106	-0.0764208	-0.0598072
mp-1013749	-2.60072	-2.50095
mp-761298	-2.58732	-2.62018
mp-30159	-1.24488	-1.30983
mp-767576	-2.20216	-2.2044
mp-867895	-0.239576	-0.23035
mp-1019596	-3.82706	-3.85023
mp-10892	-0.656886	-0.641227
mp-762279	-3.35346	-3.3948
mp-757173	-1.77736	-1.79511
mp-26377	-2.57599	-2.60082
mp-767041	-1.95904	-1.96128
mp-863066	-2.87105	-2.92125
mp-764215	-2.12177	-2.17004
mp-771622	-2.41173	-2.35515
mp-2281	-1.11747	-1.17602
mp-1638	-0.273517	-0.253989
mp-1018123	-0.438162	-0.424428
mp-17897	-3.15182	-3.15562
mp-772245	-1.58597	-1.6489
mp-27999	-0.247841	-0.359449
mp-779518	-2.80272	-2.7957
mp-971859	0.279527	0.628398
mp-7961	-1.63839	-1.6605
mp-541837	-0.333268	-0.383905
mp-763386	-2.42956	-2.45314
mp-631331	0.834723	0.646559
mp-28997	-0.681615	-0.653244
mp-644280	-0.434127	-0.479617
mp-557134	-3.23923	-3.20326
mp-752733	-2.67147	-2.67403
mp-21684	-0.502509	-0.528644
mp-771235	-3.45672	-3.43062
mp-27600	-2.29593	-2.25414
mp-761816	-1.43271	-1.44954
mp-19932	-0.448086	-0.417443
mp-850372	-2.47246	-2.46616
mp-25625	-2.22072	-2.20502
mp-1529	-1.06548	-0.99507
mp-764494	-2.73068	-2.73818
mp-27140	-1.98215	-1.9956
mp-556674	-2.56043	-2.57787
mp-14243	-1.55871	-1.53755
mp-18373	-1.38515	-1.38901
mp-566592	-2.31211	-2.31751
mp-984717	-0.345499	-0.146492
mp-13042	-3.20184	-3.18553
mp-474	-0.108712	-0.12359
mp-765708	-3.02988	-3.0481
mp-769799	-1.59852	-1.6592
mp-754790	-2.6822	-2.69277
mp-7226	-0.12611	-0.155972
mp-765886	-1.66526	-1.57207
mp-762973	-2.62884	-2.6217
mp-762247	-2.36872	-2.32692
mp-569428	-0.0358548	-0.0441288
mp-31036	-0.199707	-0.201757
mp-554918	-3.52696	-3.53276
mp-542933	-0.180329	-0.18077
mp-1180	-0.290233	-0.361485
mp-16826	-0.96723	-0.968191
mp-1008	0.16232	0.222986
mp-771303	-2.52613	-2.51434
mp-766777	-2.51754	-2.54054
mp-740719	-1.85196	-1.89679
mp-17777	-2.8049	-2.87481
mp-762724	-2.61936	-2.58764
mp-778709	-2.33705	-2.31768
mp-864981	-0.610853	-0.608547
mp-556975	-1.92881	-1.94135
mp-1008752	-1.24581	-1.23602
mp-763242	-2.74396	-2.75676
mp-765364	-2.26034	-2.27406
mp-853140	-2.53752	-2.53291
mp-30119	-1.96798	-2.0229
mp-721347	-2.33695	-2.32399
mp-762819	-2.05132	-2.02226
mp-542078	-0.901724	-0.905477
mp-782641	-2.15691	-2.14366
mp-771068	-2.36679	-2.38347
mp-851007	-2.06194	-2.01189
mp-3216	-1.15932	-1.25735
mp-11644	0.0497947	-0.0132917
mp-707285	-1.16909	-1.14401
mp-977586	-0.301371	-0.29159
mp-770330	-2.58604	-2.56235
mp-866500	-1.94828	-1.96948
mp-757806	-2.5307	-2.51423
mp-580748	-0.593378	-0.561984
mp-23583	-1.87509	-1.79592
mp-765381	-2.73811	-2.70368
mp-977438	-0.483976	-0.544975
mp-626193	-2.29164	-2.30418
mp-30251	-2.52968	-2.58907
mp-765595	-2.46855	-2.43395
mp-30473	-0.484447	-0.512028
mp-555147	-3.21484	-3.19887
mp-975397	0.157748	0.150797
mp-776061	-2.83575	-2.85543
mp-18163	-0.498887	-0.506945
mp-28320	-0.166132	-0.161132
mp-29724	-0.265611	-0.271804
mp-763081	-2.20254	-2.21483
mp-766360	-2.46452	-2.46763
mp-558724	-2.04375	-2.07919
mp-767695	-2.8738	-2.86855
mp-565656	-2.82311	-2.8189
mp-974221	-0.318702	-0.31249
mp-23944	-1.21479	-1.2935
mp-754246	-2.77904	-2.77485
mp-20643	-2.59652	-2.59595
mp-16504	-0.553944	-0.544962
mp-603327	-1.31705	-1.32544
mp-560535	-2.9431	-2.92747
mp-704836	-2.70209	-2.42593
mp-30278	-1.009	-0.944731
mp-764218	-2.78881	-2.79359
mp-4993	-0.836391	-0.843626
mp-772348	-1.94405	-2.00438
mp-540940	-0.59438	-0.675402
mp-770968	-2.17381	-2.19274
mp-4438	-2.62759	-2.68626
mp-35929	-2.10764	-2.09912
mp-603609	-1.44997	-1.4447
mp-767716	-3.01582	-2.98677
mp-556592	-0.725112	-0.740221
mp-754408	-1.72489	-1.71481
mp-7073	-2.00977	-2.047
mp-30479	-0.395495	-0.383578
mp-754202	-1.2308	-1.28421
mp-2617	-0.186256	-0.256562
mp-690684	-1.91748	-1.92039
mp-778325	-2.7172	-2.71725
mp-763359	-1.89955	-1.87541
mp-686947	-2.69551	-2.71839
mp-15178	-0.376773	-0.323484
mp-556262	-3.254	-3.27436
mp-571662	-0.842029	-0.856627
mp-567278	-1.33156	-1.31597
mp-7263	-0.977644	-0.847944
mp-550893	-3.83387	-3.95507
mp-776357	-2.81487	-2.78531
mp-23552	-1.49203	-1.50995
mp-770311	-2.54835	-2.5655
mp-997013	-0.415706	-0.413127
mp-27987	-1.1596	-1.34642
mp-2183	-1.6717	-1.54774
mp-647818	-2.31665	-2.2355
mp-23152	0.0895614	0
mp-764981	-2.86563	-2.8711
mp-8966	-0.733317	-0.727442
mp-631303	0.768803	0.658559
mp-29221	-4.09105	-4.10995
mp-675472	-3.14979	-3.13316
mp-510486	-0.444738	-0.576628
mp-865002	-0.582134	-0.59911
mp-917	-0.102999	0.0155134
mp-12233	-2.7247	-2.70541
mp-540966	-0.577703	-0.607716
mp-30771	-0.440955	-0.442064
mp-16035	-3.16458	-3.21566
mp-569952	-1.72399	-1.73534
mp-989594	-0.173133	-0.198605
mp-698600	-2.05668	-2.03603
mp-771902	-2.52409	-2.55595
mp-771616	-2.11788	-2.15789
mp-505186	-1.34465	-1.31827
mp-30335	-0.150927	-0.166394
mp-27227	-0.770634	-0.822067
mp-1275	-0.263094	-0.297078
mp-759673	-2.5182	-2.51391
mp-21466	-2.53142	-2.53846
mp-24095	-0.70766	-0.705954
mp-546621	-2.37211	-2.37188
mp-18164	-2.35666	-2.3265
mp-554766	-1.89405	-1.82005
mp-763952	-2.11338	-2.12615
mp-36529	-2.1234	-2.19985
mp-631387	0.594967	0.594772
mp-778920	-2.50013	-2.49329
mp-504795	-2.25847	-2.27152
mp-17649	-2.49581	-2.49733
mp-776273	-2.25881	-2.28854
mp-600016	-3.26401	-3.27827
mp-9522	-1.45346	-1.4827
mp-778706	-2.28688	-2.26704
mp-765457	-2.98748	-3.02781
mp-20337	-2.7223	-2.8661
mp-775327	-2.4289	-2.45039
mp-780479	-2.4434	-2.43235
mp-8638	0.0101983	0.0694062
mp-773726	-2.38574	-2.39107
mp-767296	-2.67907	-2.64693
mp-32113	-2.42413	-2.41636
mp-781698	-1.46669	-1.48443
mp-768510	-2.53136	-2.65725
mp-12563	-0.745183	-0.576455
mp-977439	-0.239455	-0.245266
mp-11690	-0.57537	-0.537903
mp-1018732	-1.16365	-1.12701
mp-30343	-0.0193522	-0.0403464
mp-772013	-2.53488	-2.53504
mp-777942	-0.40058	-0.377971
mp-676643	-1.91374	-1.87487
mp-25057	-2.18648	-2.2046
mp-782009	-1.95993	-1.94776
mp-27840	-0.50918	-0.496141
mp-977239	0.552601	0.418103
mp-635	-0.590955	-0.616035
mp-542452	-1.24478	-1.25556
mp-768486	-1.93838	-1.91616
mp-781607	-2.41851	-2.41157
mp-569849	-0.218093	-0.233378
mp-770032	-2.21346	-2.23596
mp-765498	-2.93414	-2.92065
mp-541938	-0.549315	-0.543869
mp-13938	-3.03008	-3.0294
mp-774	-0.144139	-0.109745
mp-8116	-1.08413	-1.07707
mp-696878	-2.71558	-2.75292
mp-21222	-0.730379	-0.73332
mp-765930	-1.98444	-1.95551
mp-866150	-0.127121	-0.140969
mp-772006	-2.33558	-2.41097
mp-541062	-1.01586	-1.01535
mp-760255	-2.54979	-2.61672
mp-680472	-0.711241	-0.76488
mp-763333	-2.65798	-2.65753
[truncated: 7,275 more rows]

## Sheet: full model
name	prediction	target
mp-849675	-2.48617	-2.48929
mp-756392	-2.6408	-2.6252
mp-775445	-1.73567	-1.73387
mp-27760	-0.612933	-0.600461
mp-975368	-0.020334	-0.0305083
mp-733637	-1.38313	-1.4027
mp-10782	-1.70539	-1.72873
mp-23165	-0.344708	-0.261028
mp-762258	-2.10595	-2.06247
mp-29245	-0.323932	-0.310339
mp-763857	-2.70738	-2.71288
mp-16167	-0.605368	-0.618756
mp-9767	-0.790312	-0.826163
mp-27792	-2.04357	-2.03579
mp-764830	-2.84276	-2.84299
mp-752514	-1.71115	-1.73031
mp-626568	-2.09785	-2.07843
mp-504742	-0.284301	-0.31157
mp-16821	-2.58684	-2.57902
mp-3591	-0.683092	-0.706972
mp-11254	-0.760516	-0.764235
mp-775484	-3.47858	-3.48541
mp-973951	-0.64798	-0.650351
mp-863884	-3.05335	-3.03994
mp-685281	-2.0024	-2.00176
mp-638590	-0.227967	-0.192915
mp-1239	-0.305654	-0.340251
mp-570900	-0.209718	-0.222707
mp-12570	-0.313304	-0.249034
mp-776082	-3.30086	-3.27921
mp-558458	-3.42047	-3.4364
mp-28073	-2.60953	-2.68688
mp-19580	-2.84812	-2.85983
mp-699558	-2.39379	-2.38528
mp-755794	-2.25924	-2.2543
mp-851027	-2.07418	-2.07686
mp-9071	-0.517863	-0.522414
mp-505543	-0.670541	-0.650078
mp-568942	-0.477563	-0.478589
mp-5091	-0.418461	-0.426156
mp-625915	-2.24467	-2.22364
mp-753414	-2.48382	-2.51505
mp-769039	-3.01507	-3.04128
mp-984716	-2.60414	-2.61721
mp-568350	-1.97479	-1.99225
mp-28040	-0.312392	-0.295251
mp-35421	-2.50819	-2.55403
mp-775965	-2.23283	-2.24512
mp-975857	0.14469	0.15189
mp-772231	-1.97456	-1.98945
mp-690526	-1.91964	-1.85189
mp-556135	-1.98802	-2.0429
mp-754010	-1.1409	-1.13948
mp-770231	-2.14906	-2.14464
mp-677138	-2.49369	-2.4992
mp-763011	-2.9287	-2.91686
mp-30311	-0.899174	-0.865423
mp-30460	-0.666541	-0.670611
mp-865866	-0.871872	-0.876126
mp-19575	-1.83364	-1.82213
mp-505270	-2.68884	-2.64802
mp-753656	-2.12852	-2.12354
mp-770097	-1.79171	-1.75978
mp-763320	-2.90721	-2.88322
mp-1009792	0.723159	0.453408
mp-20846	-0.388894	-0.436858
mp-4187	-0.809249	-0.834142
mp-771645	-1.65685	-1.6658
mp-1244	-0.468659	-0.486424
mp-556627	-1.35779	-1.35875
mp-763530	-2.61988	-2.62342
mp-762879	-2.32585	-2.33973
mp-556385	-1.24698	-1.33609
mp-265	-0.641923	-0.684115
mp-773763	-2.11881	-2.03267
mp-541177	-3.26173	-3.26282
mp-764366	-1.27446	-1.27938
mp-690978	-3.41837	-3.38091
mp-676456	-3.52787	-3.55713
mp-760385	0.0366733	0.0935748
mp-24337	-1.82191	-1.84461
mp-17902	-1.74192	-1.7291
mp-698480	-1.75629	-1.78595
mp-978939	0.0546613	0.0579219
mp-687152	-1.46585	-1.44051
mp-769271	-3.43189	-3.44928
mp-31589	-2.11718	-2.1284
mp-1008556	-0.98777	-1.11474
mp-12843	-1.70596	-1.70781
mp-754933	-2.63507	-2.63871
mp-8597	-0.583671	-0.575035
mp-8919	-1.22702	-1.27549
mp-723175	-2.21871	-2.22406
mp-1020616	-2.90489	-2.92406
mp-766176	-2.5508	-2.53597
mp-780483	-2.47025	-2.47012
mp-7094	-1.73911	-1.73344
mp-556717	-1.19606	-1.18401
mp-776618	-2.42381	-2.42733
mp-541140	-0.640603	-0.640536
mp-779925	-2.53998	-2.57264
mp-778698	-1.78811	-1.76375
mp-676780	-0.414355	-0.442569
mp-21401	-0.911132	-0.924938
mp-540540	-2.2924	-2.24174
mp-780204	-2.27325	-2.28816
mp-30644	-0.390755	-0.456467
mp-558967	-1.33081	-1.31006
mp-2914	-0.838234	-0.857201
mp-556661	-3.30286	-3.31249
mp-767031	-3.11379	-3.1117
mp-542839	-0.0902535	-0.0940199
mp-754322	-2.19597	-2.20209
mp-771568	-1.60106	-1.58031
mp-695843	-0.974496	-0.936894
mp-764125	-2.59868	-2.60254
mp-707218	-2.75463	-2.7709
mp-19329	-2.59372	-2.61103
mp-11055	-0.287103	-0.298511
mp-18819	-2.10413	-2.12639
mp-643656	-0.544637	-0.502864
mp-762530	-2.45609	-2.46718
mp-771456	-1.72208	-1.74178
mp-982662	-3.34059	-3.36321
mp-29784	-1.12662	-1.1103
mp-530294	-3.83626	-3.86265
mp-977551	-0.0420618	-0.0501918
mp-555958	-2.8654	-2.87713
mp-555443	-2.04889	-2.06981
mp-771988	-2.23097	-2.23499
mp-767147	-2.50548	-2.5158
mp-4454	-0.482074	-0.487294
mp-505299	-2.61752	-2.60365
mp-567258	-0.367157	-0.365376
mp-11971	-0.897268	-0.91126
mp-18629	-2.90609	-2.91587
mp-776323	-2.27199	-2.25094
mp-1029	-4.08633	-4.18139
mp-763065	-2.17586	-2.24214
mp-601817	-0.112212	-0.0648166
mp-25906	-2.40049	-2.40022
mp-4805	-3.54453	-3.56403
mp-774586	-2.74322	-2.7757
mp-776922	-1.07305	-1.1178
mp-1011260	-2.43678	-2.52754
mp-779766	-1.66946	-1.62086
mp-560387	-3.0233	-3.01307
mp-777912	-2.27586	-2.26018
mp-867177	-0.408561	-0.412057
mp-10489	-0.93209	-0.9637
mp-20108	-0.428765	-0.426986
mp-555151	-1.143	-1.13992
mp-541735	-1.42775	-1.44029
mp-770014	-2.6676	-2.66526
mp-998147	-0.992279	-1.04573
mp-755751	-4.27821	-4.30487
mp-19178	-1.0193	-1.04962
mp-849514	-2.41505	-2.41029
mp-776733	-3.18822	-3.18002
mp-542164	-1.10379	-1.13185
mp-32324	-2.24166	-2.28247
mp-4122	-2.60796	-2.60255
mp-781082	-2.53789	-2.59185
mp-2489	-0.289881	-0.122809
mp-685606	-1.83349	-1.86446
mp-778276	-2.3947	-2.39227
mp-25755	-2.59131	-2.58724
mp-1156	-0.0725131	-0.162561
mp-772195	-3.71418	-3.71911
mp-693753	-3.17892	-3.2263
mp-5116	-2.04727	-2.04949
mp-767707	-2.58721	-2.62373
mp-530449	-2.73149	-2.72421
mp-33753	-2.69332	-2.70247
mp-769118	-3.11868	-3.10103
mp-4952	-0.328742	-0.319297
mp-770633	-2.26905	-2.28268
mp-15239	-2.92896	-2.92506
mp-569568	-0.541474	-0.570784
mp-777469	-2.44088	-2.45259
mp-761598	-2.77225	-2.78302
mp-510264	-2.66896	-2.68275
mp-622213	-0.736432	-0.757307
mp-667305	-1.92978	-1.95264
mp-3352	-1.01097	-0.994166
mp-972185	0.000412613	0.0210676
mp-18019	-2.97903	-2.99736
mp-556544	-3.21857	-3.2073
mp-18332	-2.03243	-2.07353
mp-556665	-0.744644	-0.747303
mp-866536	-0.423311	-0.29905
mp-34326	-1.11492	-1.10935
mp-9486	-3.52112	-3.53349
mp-7924	-0.189316	-0.181283
mp-27272	-1.47541	-1.52523
mp-999550	-0.0417774	0.0597964
mp-631451	0.628584	0.776139
mp-705333	-2.51969	-2.51892
mp-9775	-0.856104	-0.870939
mp-768015	-1.77982	-1.81265
mp-756118	-3.82546	-3.86239
mp-27775	-2.57012	-2.57197
mp-568782	-0.568644	-0.644146
mp-850481	-2.1211	-2.14208
mp-865878	-0.420989	-0.478647
mp-19732	-1.10244	-1.11639
mp-761431	-2.63464	-2.64819
mp-19114	-2.55219	-2.55958
mp-10003	-0.324198	-0.343186
mp-853199	-2.24715	-2.24662
mp-21900	-1.03742	-1.04914
mp-977579	-0.630281	-0.608965
mp-774223	-1.50507	-1.49264
mp-763701	-2.70591	-2.72469
mp-767810	-2.07817	-2.05511
mp-23326	-2.8763	-2.89005
mp-590	-0.289869	-0.288202
mp-2971	-0.15868	-0.175389
mp-33737	-1.47325	-1.50745
mp-11299	0.00483252	0.00955682
mp-654225	-1.66565	-1.63794
mp-540431	-2.40694	-2.44058
mp-778590	-2.12136	-2.12783
mp-573721	-0.433682	-0.457054
mp-410	-1.02115	-1.08973
mp-24436	-2.16179	-2.1623
mp-558672	-2.6894	-2.73033
mp-771786	-1.27277	-1.3276
mp-771071	-2.36013	-2.38276
mp-23386	-0.580415	-0.617232
mp-672689	-0.681073	-0.686017
mp-19508	-3.18063	-3.19031
mp-11554	-0.959662	-0.911937
mp-1018715	-0.0413087	0.0326237
mp-1008524	-0.598825	-0.302315
mp-13053	-0.47207	-0.461893
mp-763155	-1.70835	-1.71033
mp-756018	-2.91628	-2.91557
mp-637255	-0.283823	-0.307103
mp-770341	-2.56137	-2.56805
mp-764801	-2.04184	-2.07998
mp-16996	-2.69488	-2.70517
mp-31094	-0.714706	-0.693188
mp-780288	-2.24681	-2.23972
mp-690607	-1.23585	-1.25683
mp-20485	-0.454703	-0.511518
mp-5942	-0.963856	-0.930315
mp-570680	-0.865798	-0.871055
mp-11113	-0.639651	-0.690918
mp-4955	-0.402087	-0.416416
mp-768490	-1.96616	-1.99771
mp-763681	-2.01579	-2.00154
mp-625184	-2.16894	-2.18863
mp-30776	-0.0249673	-0.0379159
mp-773925	-2.26985	-2.28127
mp-510564	-0.41833	-0.45033
mp-23013	-2.79511	-2.88363
mp-641191	-2.50741	-2.50626
mp-695515	-3.15121	-3.15227
mp-17660	-1.5254	-1.53735
mp-764286	-2.7894	-2.81315
mp-777911	-2.28118	-2.26791
mp-625652	-1.21078	-1.21091
mp-21014	-0.877031	-0.877852
mp-761814	-2.34356	-2.35259
mp-773081	-2.98609	-2.98814
mp-631549	1.04647	1.27574
mp-767801	-2.35808	-2.36273
mp-566053	-2.27013	-2.27118
mp-771502	-1.90654	-1.89467
mp-976061	-0.41654	-0.371094
mp-744644	-1.52536	-1.5424
mp-770855	-2.43057	-2.43768
mp-764274	-2.67752	-2.72263
mp-771184	-2.05761	-2.03501
mp-566895	-1.70102	-1.70817
mp-33056	0.548431	2.21162
mp-767165	-1.4724	-1.49478
mp-862940	-0.771515	-0.79715
mp-866152	-0.490127	-0.429901
mp-2038	-2.39295	-2.39543
mp-775705	-2.39604	-2.38053
mp-28945	-0.217245	-0.268966
mp-7555	-0.534872	-0.58664
mp-761745	-1.32323	-1.32497
mp-24657	-2.07074	-2.08503
mp-5022	-0.918593	-0.912224
mp-754095	-2.17769	-2.15345
mp-763930	-1.99019	-1.97231
mp-762980	-2.44638	-2.44678
mp-763115	-1.90775	-1.91551
mp-766341	-1.87369	-1.89634
mp-866134	-0.0708698	-0.128009
mp-771795	-1.81924	-1.83249
mp-672979	-2.52186	-2.54481
mp-761392	-2.54318	-2.56061
mp-1270	-2.44847	-2.47208
mp-557604	-3.13942	-3.13285
mp-621131	0.0443486	0.102095
mp-641945	-0.650161	-0.65507
mp-763978	-2.69943	-2.70604
mp-25154	-2.64983	-2.6623
mp-11436	-0.406992	-0.404651
mp-28357	-2.35544	-2.35904
mp-32425	-2.62532	-2.64098
mp-567391	-1.89153	-1.89736
mp-776435	-2.991	-3.053
mp-556341	-1.46784	-1.48904
mp-6478	-2.79173	-2.7785
mp-764000	-2.6426	-2.62374
mp-540164	-2.22836	-2.19715
mp-767099	-2.42898	-2.42165
mp-541026	-3.26354	-3.25584
mp-772829	-2.76431	-2.74245
mp-769290	-2.16253	-2.15171
mp-541747	-1.95155	-1.95255
mp-861951	-0.521078	-0.558884
mp-32024	-2.54468	-2.55229
mp-778458	-1.95294	-1.96669
mp-23465	-1.71163	-1.70763
mp-12467	-1.01377	-0.988132
mp-8059	-3.29005	-3.28438
mp-766153	-2.13188	-2.11343
mp-556822	-2.3865	-2.39046
mp-20774	-0.579137	-0.588355
mp-569806	-0.859508	-0.870017
mp-569251	-0.665002	-0.645795
mp-13801	-1.09144	-1.16962
mp-543029	-1.50462	-1.53443
mp-743715	-1.50019	-1.25653
mp-775660	-2.19171	-2.22558
mp-769569	-1.35191	-1.35441
mp-756073	-2.71953	-2.69708
mp-769399	-3.3997	-3.41865
mp-8290	-3.43107	-3.41837
mp-973738	-1.21196	-1.03017
mp-570400	-0.191382	-0.230958
mp-558628	-2.49754	-2.47562
mp-17812	-3.23494	-3.23489
mp-22958	-1.02903	-1.06521
mp-1006368	-1.38057	-1.34876
mp-14115	-1.52848	-1.57429
mp-972220	-0.869795	-0.848065
mp-777678	-2.82032	-2.82329
mp-29827	-0.37848	-0.389177
mp-776752	-2.45598	-2.46302
mp-25043	-1.97897	-1.99731
mp-766842	-2.91253	-2.95396
mp-10410	-1.98066	-1.97817
mp-819	-0.0717368	-0.114793
mp-561428	-1.7625	-1.67783
mp-14556	-2.90665	-2.91364
mp-776496	-3.15082	-3.1893
mp-558777	-2.68097	-2.66739
mp-849986	-2.71758	-2.71922
mp-5024	-3.1192	-3.13045
mp-559607	-2.80441	-2.80401
mp-769697	-1.06585	-1.00735
mp-996966	-0.995127	-1.01736
mp-778274	-3.712	-3.72514
mp-770316	-2.55663	-2.56576
mp-645135	-2.78464	-2.80442
mp-1002063	-0.786813	-0.753884
mp-767625	-3.16279	-3.17452
mp-759117	-2.50812	-2.51897
mp-849373	-2.47714	-2.47681
mp-23285	-0.829067	-0.782108
mp-13911	-0.321583	-0.314264
mp-18748	-1.37405	-1.42094
mp-579278	-2.16478	-2.20391
mp-11526	-0.342882	-0.340105
mp-565704	-2.49378	-2.51659
mp-753973	-2.47814	-2.49265
mp-780809	-1.38645	-1.36089
mp-771709	-2.45539	-2.48114
mp-21611	-2.66748	-2.63812
mp-13819	-2.11831	-2.13609
mp-19083	-2.38819	-2.39313
mp-765270	-2.50756	-2.51292
mp-1187	-0.843282	-0.816256
mp-15746	-0.461359	-0.493901
mp-569895	-2.54996	-2.26357
mp-631308	0.514099	0.538691
mp-764088	-2.71489	-2.67113
mp-23626	-1.39908	-1.41096
mp-557203	-3.62147	-3.62928
mp-865402	-0.43678	-0.467329
mp-720212	-3.08194	-3.08908
mp-11225	-0.389442	-0.416154
mp-21810	-0.785231	-0.784689
mp-4264	-2.18672	-2.14661
mp-18257	0.101596	0.0768913
mp-6698	-3.17864	-3.18978
mp-743769	-3.08334	-2.97352
mp-557319	-1.39833	-1.4129
mp-775272	-2.36075	-2.36218
mp-753795	-1.84952	-1.87957
mp-9619	-0.631556	-0.658193
mp-760440	-3.669	-3.64611
mp-763690	-1.73619	-1.71398
mp-570539	-0.31364	-0.35744
mp-569120	-0.871568	-0.839691
mp-27474	-1.41471	-1.44114
mp-780003	-3.16367	-3.16282
mp-743716	-3.34817	-3.35418
mp-865	-0.34336	-0.409068
mp-32054	-2.45452	-2.44022
mp-561196	-1.13592	-1.13989
mp-29022	-0.77635	-0.754287
mp-19156	-2.47971	-2.47745
mp-777974	-2.34728	-2.34325
mp-772573	-2.40371	-2.47473
mp-767608	-2.65348	-2.65491
mp-27384	-0.734003	-0.733316
mp-764210	-2.38602	-2.37117
mp-774395	-2.13815	-2.13472
mp-2468	-0.46389	-0.478854
mp-4564	-2.8254	-2.82543
mp-22850	-0.986414	-0.982917
mp-10973	-0.779691	-0.808157
mp-20971	-0.333357	-0.385301
mp-767711	-2.89252	-2.90771
mp-567325	-0.554518	-0.552628
mp-774178	-1.52104	-1.50925
mp-1014230	-0.0993175	-0.186359
mp-765682	-2.3934	-2.38348
mp-773988	-2.40816	-2.42329
mp-22687	-0.301905	-0.343731
mp-850920	-2.39159	-2.39927
mp-570691	-0.281029	-0.259667
mp-2178	-0.557991	-0.614032
mp-1019578	-1.30048	-1.32372
mp-865798	-0.0659068	-0.0984462
mp-706235	-2.57144	-2.57106
mp-541047	-0.825583	-0.803694
mp-684496	-2.3086	-2.26644
mp-863726	-0.735732	-0.747986
mp-556767	-1.21871	-1.11361
mp-675546	-0.154091	-0.177063
mp-570683	-0.344498	-0.362842
mp-849667	-1.6683	-1.69834
mp-756632	-3.16401	-3.14258
mp-29811	-1.00342	-0.980605
mp-634767	-2.44162	-2.4261
mp-1008642	0.189029	0.537247
mp-764267	-2.97497	-2.96537
mp-695984	-2.26327	-2.29882
mp-540424	-2.45313	-2.46447
mp-12463	-0.315268	-0.318521
mp-971673	-0.706316	-0.701125
mp-12789	-0.300117	-0.305394
mp-631527	0.97128	0.929526
mp-623814	-0.625556	-0.627279
mp-556804	-3.26474	-3.25045
mp-21027	-0.671684	-0.687536
mp-5528	-0.598914	-0.568055
mp-565616	-3.12002	-3.04199
mp-571664	-0.697692	-0.556204
mp-558870	-2.35682	-2.31231
mp-772744	-3.14556	-3.15869
mp-762598	-2.4918	-2.49639
mp-773389	-2.53341	-2.53524
mp-20587	-2.31459	-2.47463
mp-976583	0.652284	0.80431
mp-9983	-0.764811	-0.733783
mp-10194	-1.13439	-1.20915
mp-780207	-2.04219	-2.0461
mp-767883	-2.24093	-2.24583
mp-616641	-1.12077	-1.16159
mp-6686	-3.01893	-3.01274
mp-38284	-3.8033	-3.81051
mp-767659	-1.98193	-1.98763
mp-181	-0.148131	-0.166578
mp-5766	-1.69623	-1.67376
mp-767334	-2.61968	-2.63077
mp-21872	-3.90556	-3.93567
mp-31677	-2.39975	-2.43971
mp-4156	-3.02318	-3.05764
mp-18246	-0.933007	-0.917323
mp-770595	-2.13988	-2.17994
mp-639160	-0.700081	-0.716932
mp-1020029	-1.63909	-1.4525
mp-27167	-2.06925	-2.06654
mp-8216	-3.5223	-3.54292
mp-6580	-2.59881	-2.59236
mp-759933	-2.44059	-2.48354
mp-445	-0.0202985	-0.0253077
mp-767872	-2.66396	-2.673
mp-504106	-2.6858	-2.66001
mp-560001	-3.06964	-3.0765
mp-540000	-1.08717	-1.07697
mp-696655	-1.90908	-1.91832
mp-777499	-2.30751	-2.33692
mp-557724	-2.53001	-2.5446
mp-17888	-3.88596	-3.88518
mp-556778	-3.16404	-3.16271
mp-19513	-2.31441	-2.34714
mp-21141	-0.078639	-0.0806651
mp-767432	-2.98207	-2.99222
mp-540545	-1.31955	-1.30446
mp-19255	-2.44031	-2.45091
mp-759882	-0.876461	-0.88883
mp-31954	-2.47343	-2.47847
mp-765664	-2.37055	-2.3685
mp-8673	-1.99981	-2.0232
mp-676489	-1.23371	-1.27074
mp-734123	-2.29567	-2.30758
mp-761626	-1.66753	-1.70727
mp-647606	-0.497116	-0.461929
mp-8388	-2.55707	-2.55437
mp-754556	-1.04855	-0.984499
mp-568184	-0.48629	-0.50184
mp-722913	-0.76237	-0.772141
mp-669521	-2.17466	-2.20395
mp-853141	-2.36803	-2.39032
mp-613172	-2.1542	-2.16371
mp-571258	-1.00581	-0.905045
mp-971928	0.137497	0.13751
mp-1005689	-0.187096	-0.220253
mp-29580	-1.00502	-0.988954
mp-540260	-2.60701	-2.6267
mp-25662	-1.40305	-1.27813
mp-979981	-0.465234	-0.463714
mp-771916	-1.62675	-1.60275
mp-2534	-0.201578	-0.355646
mp-556932	-2.27208	-2.2658
mp-17260	-0.275706	-0.323288
mp-12657	-0.391611	-0.44338
mp-23742	-2.19262	-2.18904
mp-703515	-2.28321	-2.31154
mp-764732	-2.10125	-2.10772
mp-35530	-1.92279	-1.92348
mp-978962	0.557389	0.869938
mp-566864	-3.04823	-3.06372
mp-30177	-0.233625	-0.216686
mp-12780	-0.605699	-0.596314
mp-976876	-0.0501187	-0.0890637
mp-22846	-0.774418	-0.655458
mp-11412	-0.538478	-0.562035
mp-567602	-0.741741	-0.757196
mp-22479	-1.25977	-1.259
mp-764572	-2.44377	-2.44401
mp-25024	-2.74558	-2.74493
mp-697020	-2.65561	-2.66467
mp-997048	-0.213155	-0.202641
mp-570661	-0.548786	-0.580556
mp-19065	-3.72024	-3.73809
mp-862316	-0.610882	-0.691561
mp-555485	-3.1472	-3.14768
mp-32415	-2.62642	-2.63789
mp-2050	-1.07697	-1.11145
mp-557483	-3.56062	-3.75679
mp-558933	-2.16673	-2.15163
mp-772001	-2.29463	-2.30148
mp-570046	-1.0731	-1.11228
mp-772355	-1.25625	-1.25313
mp-769629	-2.60689	-2.60603
mp-760825	-1.84016	-1.82064
mp-780864	-2.06762	-2.06233
mp-761701	-1.48342	-1.47308
mp-8758	-0.367015	-0.298069
mp-631498	1.07502	1.32147
mp-863664	-0.432648	-0.46756
mp-1346	-0.858151	-0.810032
mp-6563	-0.376066	-0.397508
mp-31011	-0.965441	-0.979309
mp-1019279	-0.520094	-0.522685
mp-1007821	-0.0976773	-0.102056
mp-770612	-1.6969	-1.67931
mp-775987	-2.752	-2.76698
mp-568864	-1.72221	-1.71468
mp-26409	-2.73109	-2.75763
mp-763913	-2.36308	-2.35377
mp-565869	-2.74005	-2.7446
mp-760492	-1.494	-1.42825
mp-867309	-0.688182	-0.702332
mp-566629	-2.45905	-2.49712
mp-558055	-0.851909	-0.842602
mp-27210	-2.54055	-2.51177
mp-2795	-0.72142	-0.807515
mp-631471	0.580541	0.881497
mp-31857	-3.0218	-3.08761
mp-853193	-2.40055	-2.39131
mp-2215	-0.147175	-0.264453
mp-862365	-0.698948	-0.700211
mp-540355	-2.37372	-2.38191
mp-755678	-1.5036	-1.483
mp-763762	-0.74844	-0.883261
mp-11165	-2.93321	-2.93822
mp-7108	-1.02159	-1.00176
mp-562394	-2.96572	-2.96735
mp-25545	-1.77783	-1.77863
mp-566771	-1.69806	-1.70349
mp-9055	-2.86595	-2.90183
mp-762915	-1.16952	-1.17021
mp-757673	-2.82432	-2.84442
mp-758350	-2.40971	-2.42282
mp-770347	-2.36151	-2.36409
mp-572442	-1.46725	-1.46813
mp-27703	-1.48602	-1.50281
mp-38170	-0.499078	-0.3735
mp-504570	-1.70508	-1.72705
mp-757541	-2.48883	-2.47125
mp-557320	-1.75781	-1.74436
mp-1435	-0.231959	-0.217984
mp-1020144	-2.9247	-2.89828
mp-540900	-2.22435	-2.2288
mp-775177	-2.02508	-2.02157
mp-781767	-1.58919	-1.582
mp-683616	-2.96442	-2.97269
mp-675766	-1.48238	-1.33338
mp-685138	-0.921621	-0.86335
mp-774472	-3.00614	-2.98816
mp-558610	-2.57349	-2.54262
mp-757924	-1.26741	-1.24029
mp-561207	-2.79608	-2.80242
mp-36890	-2.09126	-2.09273
mp-12275	-0.513168	-0.563515
mp-552089	-1.84335	-1.85337
mp-999390	0.485918	0.0924871
mp-754369	-1.77067	-1.77655
mp-32431	-2.64133	-2.63811
mp-23138	-1.67441	-1.7225
mp-4896	-1.02334	-1.03895
mp-694945	-2.42545	-2.51644
mp-767151	-2.2345	-2.24303
mp-774964	-2.63981	-2.63943
mp-862364	-0.85741	-0.85278
mp-753946	-1.0185	-1.07558
mp-763897	-2.86229	-2.88025
mp-7104	-3.65113	-3.7408
mp-669471	-0.445306	-0.437769
mp-767985	-2.41537	-2.43194
mp-2513	-0.505072	-0.525295
mp-10378	-0.267176	-0.304957
mp-757840	-2.04648	-2.09028
mp-19230	-2.04164	-2.0733
mp-868647	-2.26486	-2.14147
mp-8812	-3.05247	-3.05475
mp-743583	-2.6382	-2.65102
mp-9757	-3.0176	-3.02671
mp-555575	-0.489325	-0.486324
mp-11769	-0.707417	-0.71967
mp-773887	-2.32571	-2.37286
mp-4527	-2.13662	-2.15691
mp-974613	-0.194355	-0.282547
mp-767245	-3.27903	-3.29284
mp-23909	-0.79332	-0.731694
mp-29210	-0.298154	-0.300512
mp-754960	-2.85873	-2.86986
mp-13456	-1.13253	-1.13868
mp-976828	0.00921461	-0.0112481
mp-984744	-0.237136	-0.2171
mp-561486	-2.9671	-2.98143
mp-23358	-0.782136	-0.760903
mp-31509	-0.423876	-0.413727
mp-2011	-0.989225	-0.96182
mp-19377	-3.1168	-3.11828
mp-18433	-3.69	-3.68655
mp-555077	-2.065	-2.06591
mp-22961	-1.90291	-1.85812
mp-27630	-1.40278	-1.56091
mp-8578	-0.685369	-0.668775
mp-778460	-2.58227	-2.56605
mp-777563	-1.03754	-0.950287
mp-1157	-0.31948	-0.337525
mp-766143	-3.13374	-3.13722
mp-776010	-2.34304	-2.34735
mp-865536	-0.782274	-0.765938
mp-557892	-1.2989	-1.289
mp-12368	-1.99105	-1.97987
mp-524	-0.438012	-0.463169
mp-29398	-1.16043	-1.26244
mp-39995	-2.61715	-2.37536
mp-7748	-2.88696	-2.88152
mp-20506	-0.4175	-0.439259
mp-504752	-2.09095	-2.12617
mp-11550	-1.00277	-0.981719
mp-4748	-2.83386	-2.83352
mp-686909	-3.06468	-3.06447
mp-27413	-0.478267	-0.483916
mp-15826	-0.737402	-0.759634
mp-645272	-1.90062	-1.88286
mp-762358	-1.94592	-1.93838
mp-579560	-1.18566	-1.20704
mp-762906	-1.71216	-1.73903
mp-20948	-0.733424	-0.728945
mp-557071	-1.68275	-1.71938
mp-39140	-2.989	-2.98129
mp-865527	-0.431109	-0.436769
mp-764510	-2.2141	-2.22038
mp-3612	-2.49151	-2.53832
mp-22146	-0.492821	-0.528303
mp-41109	-3.29576	-3.34508
mp-762249	-1.95408	-1.9607
mp-26541	-2.51023	-2.50834
mp-763997	-2.42179	-2.4258
mp-1640	-0.290862	-0.303145
mp-24799	-0.576654	-0.585337
mp-566764	-1.96318	-1.96174
mp-862360	-0.761612	-0.797742
mp-15704	-1.21883	-1.41395
mp-600051	-3.28266	-3.27468
mp-769980	-2.55663	-2.56585
mp-775782	-1.94743	-1.94089
mp-767035	-3.60269	-3.60429
mp-768335	-1.05976	-1.05929
mp-764618	-2.35813	-2.35714
mp-1002081	-1.66314	-1.71813
mp-4016	-0.965023	-0.970155
mp-761395	-2.53229	-2.52608
mp-540467	-2.25126	-2.23877
mp-626851	-1.448	-1.45359
mp-776761	-2.19769	-2.20468
mp-32537	-1.64438	-1.65467
mp-776233	-2.01452	-2.03692
mp-15795	-1.69239	-1.69644
mp-21104	-0.352244	-0.379508
mp-581834	-0.641901	-0.607681
mp-14430	-2.86025	-2.86718
mp-556210	-1.71668	-1.80202
mp-1006399	-0.335272	-0.331883
mp-12879	-0.970087	-0.983964
mp-4537	-0.801597	-0.806933
mp-763550	-2.53757	-2.54592
mp-866658	-0.909196	-0.903468
mp-989584	-1.34465	-1.34904
mp-763163	-1.44301	-1.44037
mp-3151	-2.85117	-2.86878
mp-6046	-2.42337	-2.43693
mp-25003	-3.27359	-3.27547
mp-4875	-3.70761	-3.71663
mp-743780	-3.10093	-3.12228
mp-558273	-3.3919	-3.40877
mp-542678	-1.95531	-1.92315
mp-566470	-2.57858	-2.58086
mp-1020666	-2.07975	-2.13936
mp-773060	-3.49086	-3.50464
mp-23033	-1.58162	-1.66868
mp-971804	-0.0990424	-0.111993
mp-19037	-2.30015	-2.29324
mp-780172	-3.07096	-3.07076
mp-780103	-1.99983	-2.0178
mp-29008	-1.564	-1.54104
mp-850149	-3.05649	-3.04902
mp-17679	-2.85048	-2.83615
mp-1018141	0.147251	0.179805
mp-771354	-2.66253	-2.67449
mp-32509	-2.54036	-2.55792
mp-998153	-0.707068	-0.681621
mp-1959	-3.49972	-3.62801
mp-698032	-0.383104	-0.344918
mp-850494	-1.84485	-1.83372
mp-850075	-2.45449	-2.45312
mp-862802	-1.46434	-1.50235
mp-676400	-0.845441	-0.860039
mp-765679	-1.14745	-1.14528
mp-638749	-0.392656	-0.389921
mp-771900	-2.35584	-2.34919
mp-22925	-0.236149	-0.284537
mp-19116	-2.96117	-2.97324
mp-571474	-0.768662	-0.743529
mp-2987	-0.204775	-0.19247
mp-24399	-1.70883	-1.69815
mp-32465	-2.56783	-2.57237
mp-551283	-1.47991	-1.50048
mp-765991	-2.64326	-2.6193
mp-20642	0.0339899	0.0557791
mp-559091	-3.27811	-3.28498
mp-31572	-2.26384	-2.27261
mp-30640	-0.03029	-0.0282485
mp-11118	-1.35043	-1.36231
mp-30814	-0.434501	-0.379071
mp-974846	1.28631	1.43579
mp-780749	-1.81336	-1.83775
mp-569577	-0.562082	-0.568041
mp-541435	-1.97388	-1.96625
mp-468	-3.86567	-3.88983
mp-765814	-1.29901	-1.31564
mp-19820	-0.215971	-0.213064
mp-30419	-0.218928	-0.151851
mp-12762	-0.444796	-0.483353
mp-770345	-2.60729	-2.6014
mp-1523	-1.10758	-0.962951
mp-32061	-2.93764	-2.86373
mp-764796	-2.34291	-2.34822
mp-18474	-0.115178	-0.154308
mp-761661	-1.71582	-1.72383
mp-777554	-1.78398	-1.80585
mp-21440	-0.269307	-0.265577
mp-765042	-2.48025	-2.48969
mp-760062	-3.20564	-3.20637
mp-780553	-2.45052	-2.41988
mp-761768	-2.92507	-2.93827
mp-1013691	-0.826954	-0.839781
mp-35015	-0.611469	-0.694158
mp-754502	-3.15465	-3.20797
mp-769511	-2.39472	-2.40344
mp-642157	-1.6155	-1.57384
mp-541688	-0.899641	-0.875815
mp-15391	-1.90574	-1.89058
mp-9956	-0.105132	-0.179931
mp-775391	-2.77504	-2.76814
mp-861978	-0.701283	-0.743532
mp-542598	-0.215087	-0.196792
mp-754658	-1.33345	-1.34304
mp-978287	0.243871	0.313294
mp-768500	-1.92318	-1.90935
mp-556009	-1.59737	-1.58933
mp-767533	-2.77633	-2.77512
mp-21002	-0.631816	-0.656784
mp-978102	-0.728225	-0.725905
mp-773906	-2.69806	-2.70126
mp-997043	-0.99757	-0.973641
mp-31134	-0.841629	-0.837848
mp-776445	-2.10429	-2.12136
mp-6820	-1.61654	-1.59524
mp-22903	-1.4851	-1.49083
mp-10481	-0.395736	-0.387829
mp-17706	-0.756797	-0.799466
mp-861665	-0.329666	-0.35831
mp-772916	-1.60967	-1.58935
mp-765554	-1.18167	-1.19376
mp-644292	-0.565084	-0.504548
mp-25526	-2.32254	-2.33104
mp-12571	-0.535463	-0.658853
mp-778713	-1.0799	-1.03872
mp-10615	-0.875931	-0.876298
mp-686908	-2.68312	-2.69475
mp-9467	-3.28918	-3.29781
mp-776731	-2.34394	-2.35186
mp-31648	-2.6365	-2.64151
mp-684031	-0.114672	-0.157976
mp-3427	-3.0965	-3.09947
mp-779985	-1.91409	-1.83107
mp-559151	-3.50908	-3.51221
mp-9953	-1.27888	-1.29846
mp-556171	-1.842	-1.83748
mp-776649	-1.96991	-1.92709
mp-42508	-3.00751	-2.97454
mp-775983	-2.30359	-2.26804
mp-667342	-1.59563	-1.61117
mp-763382	-2.46255	-2.47799
mp-556085	-1.58884	-1.59115
mp-704703	-2.53444	-2.54894
mp-772232	-3.19316	-3.19971
mp-5503	-3.77468	-3.76299
mp-568449	-0.685808	-0.666793
mp-2721	-3.75522	-3.74137
mp-774014	-1.73076	-1.68919
mp-567486	-1.08324	-1.08514
mp-764567	-2.3301	-2.332
mp-555860	-3.25331	-3.20647
mp-29976	-1.23622	-1.22855
mp-975906	-0.12235	-0.0738083
mp-4917	-2.85453	-2.85979
mp-560671	-3.18732	-3.0977
mp-29206	-0.480295	-0.448299
mp-756086	-1.29989	-1.26772
mp-566762	-2.17765	-2.13635
mp-754596	-2.18699	-2.05766
mp-752709	-2.0401	-2.05203
mp-707343	-1.42467	-1.43551
mp-37906	-0.791874	-0.764865
mp-25759	-2.06727	-2.09248
mp-753171	-2.55512	-2.5784
mp-7976	-2.97469	-2.98586
mp-28127	-0.958186	-0.963882
mp-22052	-0.985332	-0.988395
mp-979074	-2.52197	-2.01805
mp-763543	-2.46224	-2.47654
mp-773699	-1.78104	-1.78929
mp-9880	-0.537126	-0.521753
mp-2541	-0.369325	-0.381945
mp-776187	-2.2739	-2.29091
mp-31992	-2.54989	-2.55627
mp-510728	-0.331045	-0.305756
mp-705457	-3.35701	-3.35005
mp-11356	-0.582377	-0.57042
mp-558984	-2.09568	-2.08236
mp-567975	-1.44037	-1.44352
mp-12160	-2.84779	-2.83939
mp-772296	-1.68506	-1.70024
mp-765843	-2.28657	-2.27316
mp-672966	-2.30853	-2.32651
mp-31896	-2.11494	-2.18162
mp-624190	-0.822286	-0.83347
mp-978842	-2.28369	-2.20071
mp-777021	-1.69309	-1.69854
mp-570232	-2.72571	-2.71063
mp-685108	-0.268551	-0.286172
mp-779167	-2.51452	-2.50838
mp-556936	-2.96523	-2.93172
mp-8484	-0.858736	-1.0595
mp-763803	-2.91629	-2.92287
mp-17829	-2.9042	-2.90086
mp-8507	-0.809691	-0.81072
mp-764003	-2.23863	-2.17893
mp-755417	-3.1749	-3.16747
mp-772435	-2.69107	-2.72426
mp-560016	-2.93395	-2.92476
mp-540554	-1.56684	-1.55012
mp-28235	-0.828192	-0.83714
mp-5273	-1.41404	-1.41542
mp-646397	-2.70735	-2.70107
mp-850923	-2.8778	-2.89025
mp-675784	-0.832131	-0.936317
mp-25750	-2.53204	-2.53304
mp-735063	-1.09639	-1.0808
mp-862936	-0.293902	-0.297147
mp-779090	-2.42656	-2.41726
mp-867887	-0.464533	-0.478354
mp-566620	-2.01819	-2.03669
mp-549490	-2.57799	-2.62484
mp-15382	-2.85418	-2.85558
mp-971763	0.238117	0.269093
mp-765555	-2.45986	-2.49012
mp-336	-0.0512606	-0.0897469
mp-22981	-0.90577	-0.987375
mp-1006150	0.756522	0.680847
mp-765787	-1.98988	-2.01556
mp-765240	-2.96178	-2.91645
mp-1019532	-3.41122	-3.44347
mp-505789	-0.864794	-0.867713
mp-10597	0.006234	0.00873961
mp-755537	-3.94884	-4.00974
mp-30801	-0.287821	-0.296813
mp-556244	-0.882902	-0.881763
mp-20991	-2.11481	-2.1263
mp-779765	-2.47498	-2.48193
mp-763474	-2.42878	-2.45903
mp-867122	-0.259097	-0.249343
mp-1020022	-2.76147	-2.76378
mp-780522	-2.03007	-2.038
mp-764229	-2.68816	-2.70183
mp-759287	-1.85579	-1.8592
mp-771351	-2.0982	-2.09756
mp-999192	-0.469949	-0.453807
mp-641534	-1.35862	-1.36111
mp-17704	-3.84429	-3.84939
mp-685257	-1.41341	-1.40646
mp-773297	-2.87319	-2.90675
mp-568646	-0.445484	-0.439363
mp-20310	-0.815854	-0.872033
mp-780440	-2.42719	-2.42557
mp-972411	0.0900689	0.0939185
mp-558951	-2.64229	-2.63151
mp-541111	-1.66915	-1.68496
mp-9308	-3.51416	-3.54284
mp-19396	-1.81988	-1.80228
mp-25686	-2.40656	-2.42658
mp-975073	-0.624765	-0.637114
mp-774883	-0.76986	-0.819907
mp-850746	-2.31684	-2.32117
mp-853230	-2.21461	-2.2203
mp-862445	-0.517325	-0.554263
mp-626014	-1.04692	-1.03437
mp-19750	-3.01683	-3.02898
mp-8204	-0.0931908	-0.168146
mp-849438	-2.47244	-2.48588
mp-1017983	-0.141327	-0.134256
mp-88	0.0128685	0.00848817
mp-541416	-2.54274	-2.5117
mp-759786	-3.35095	-3.34902
mp-541597	-2.69803	-2.78794
mp-680417	-1.35215	-1.41876
mp-978536	-0.467432	-0.470722
mp-555844	-0.936907	-0.956431
mp-557655	-1.83143	-1.81729
mp-684690	-1.61725	-1.67632
mp-541183	-0.620378	-0.602871
mp-777255	-2.30677	-2.3627
mp-776803	-2.85994	-2.85807
mp-744463	-2.45607	-2.4853
mp-866637	-1.00743	-1.02448
mp-777719	-2.79888	-2.80049
mp-17750	-3.2415	-3.23198
mp-753708	-3.4694	-3.44222
mp-28705	-0.57271	-0.619479
mp-853187	-2.71738	-2.72995
mp-555268	-2.48915	-2.50432
mp-772157	-3.01928	-2.99435
mp-762163	-2.49467	-2.48622
mp-752549	-2.19196	-2.18412
mp-6644	-2.84926	-2.8833
mp-753299	-2.13921	-2.12006
mp-863856	-2.17306	-2.1866
mp-770103	-2.76791	-2.76679
mp-556185	-2.77814	-2.78295
mp-767756	-1.96677	-1.98195
mp-764	-0.121947	-0.105673
mp-4950	-3.67524	-3.71906
mp-9799	-1.89897	-1.95125
mp-764677	-2.33078	-2.32451
mp-763100	-2.88651	-2.88681
mp-772587	-3.00021	-3.0019
mp-774910	-1.55714	-1.56251
mp-9612	-2.47164	-2.46633
mp-560905	-2.05974	-2.06876
mp-776344	-2.28095	-2.28972
mp-7099	-0.430823	-0.41381
mp-26591	-2.77299	-2.78662
mp-849699	-2.57421	-2.56726
mp-504848	-1.44905	-1.43668
mp-158	0.0388759	0.0134372
mp-16825	-3.14904	-3.16169
mp-752888	-2.35746	-2.32827
mp-776740	-2.14089	-2.15148
mp-756690	-2.15565	-2.13707
mp-653560	-3.68542	-3.66856
mp-9873	-0.543846	-0.563061
mp-29787	-2.31384	-2.32471
mp-850771	-2.50095	-2.50768
mp-867955	-2.63955	-2.66781
mp-31317	-1.15053	-1.15826
mp-616204	-1.44922	-1.45917
mp-773608	-1.7631	-1.75333
mp-542302	-0.702893	-0.712756
mp-771091	-1.86798	-1.85606
mp-4007	-0.810868	-0.811598
mp-8181	-1.11753	-1.13318
mp-864878	-0.56011	-0.537384
mp-769744	-2.23969	-2.2371
mp-510098	-0.414575	-0.410406
mp-30424	-0.146772	-0.153746
mp-14824	-2.08376	-2.08942
mp-695694	-0.623635	-0.65462
mp-21412	-0.0682518	-0.120943
mp-1111	-0.364677	-0.348581
mp-18917	-1.80523	-1.79719
mp-19463	-2.4068	-2.41245
mp-772489	-3.28683	-3.30156
mp-37478	-2.32176	-2.32916
mp-5181	-0.877691	-0.902078
mp-675716	-3.63552	-3.63884
mp-17057	-2.23112	-2.22887
mp-6123	-2.84415	-2.83673
mp-123	-0.000596002	0
mp-1534	-2.31125	-2.32719
mp-560466	-2.64202	-2.61978
mp-543108	-1.95906	-1.96114
mp-28855	-2.26946	-2.31899
mp-31849	-2.52806	-2.55074
mp-9634	-1.10211	-1.08201
mp-849354	-2.68373	-2.71358
mp-1136	-0.432866	-0.404565
mp-568430	-0.0722673	-0.0720945
mp-782697	-1.73291	-1.73996
mp-777669	-2.9247	-2.9201
mp-975933	-0.454369	-0.463699
mp-758571	-3.29647	-3.32737
mp-550086	-1.99996	-1.98609
mp-768292	-2.24049	-2.24548
mp-673669	-2.03056	-2.03146
mp-676210	-1.8215	-1.85708
mp-4596	-2.48638	-2.49514
mp-757149	-3.97423	-3.95762
mp-647822	-0.375199	-0.324565
mp-486	-0.334117	-0.359562
mp-676799	-0.0243496	-0.0309895
mp-770850	-2.24835	-2.24265
mp-505113	-2.86469	-2.85639
mp-765768	-2.22294	-2.21809
mp-867267	-0.693129	-0.68195
mp-2121	-0.420403	-0.45129
mp-28950	-0.811788	-0.807568
mp-690799	-0.528044	-0.557423
mp-761676	-1.70985	-1.77836
mp-11456	-1.02458	-1.09667
mp-16684	-1.68681	-1.70771
mp-8581	-0.957849	-0.942397
mp-685995	-2.88225	-2.89504
mp-3719	-1.51478	-1.55504
mp-1009213	0.3899	0.426356
mp-540830	-2.1006	-2.06654
mp-28278	-0.752013	-0.754991
mp-2828	-1.92203	-1.94027
mp-764162	-2.62428	-2.62526
mp-778833	-1.63889	-1.63787
mp-777872	-1.70312	-1.65598
mp-571293	-0.883833	-0.888621
mp-26675	-2.50038	-2.50933
mp-20694	-1.49714	-1.58482
mp-626225	-1.45158	-1.45289
mp-744193	-1.82781	-1.81579
mp-772170	-1.51342	-1.51722
mp-849364	-1.87045	-1.84968
mp-620372	-0.602841	-0.572215
mp-22670	-0.980911	-0.992991
mp-972062	-0.545926	-0.553443
mp-763506	-2.33929	-2.47485
mp-766348	-1.6489	-1.66213
mp-777425	-2.3598	-2.36024
mp-566229	-2.30168	-2.28586
mp-8537	-2.06977	-2.13352
mp-9712	-2.49863	-2.50645
mp-2137	-0.144406	-0.171851
mp-542781	-0.124821	-0.107577
mp-781049	-3.1345	-3.14032
mp-866668	-1.14179	-1.10926
mp-11327	-0.986945	-1.02807
mp-770023	0.0117879	0.0747329
mp-754208	-2.93611	-2.96734
mp-569344	-0.793774	-0.804891
mp-697683	-1.05589	-1.03782
mp-8869	-3.04195	-3.02637
mp-559346	-2.99956	-3.01006
mp-12826	-0.0539725	-0.0542691
mp-757981	-2.00817	-2.00405
mp-775565	-2.2482	-2.24113
mp-23283	-0.802793	-0.799964
mp-10298	-1.09783	-1.11142
mp-758223	-1.72175	-1.70014
mp-767747	-2.78275	-2.77765
mp-31832	-2.52638	-2.53535
mp-867821	-0.272404	-0.275247
mp-31312	-0.328012	-0.343178
mp-774387	-3.13583	-3.14004
mp-2883	-2.99981	-3.02116
mp-868321	-2.33136	-2.34181
mp-4547	-3.28211	-3.32071
mp-558318	-3.15664	-3.15834
mp-32791	-0.151048	-0.192303
mp-23958	-1.6638	-1.64693
mp-4878	-1.02671	-1.03454
mp-557012	-2.97974	-2.96656
mp-12022	-2.45586	-2.43193
mp-562920	-3.2563	-3.26255
mp-722316	-1.23459	-1.21355
mp-773354	-1.76237	-1.75163
mp-18150	-3.00785	-3.02519
mp-765191	-1.95991	-1.93931
mp-540447	-2.43593	-2.44615
mp-18071	-1.28183	-1.28574
mp-19323	-3.18709	-3.20972
mp-541595	-0.17997	-0.140807
mp-644246	-0.616656	-0.604483
mp-979910	-0.27779	-0.276682
mp-21835	-0.329018	-0.360017
mp-667372	-2.96114	-3.00954
mp-21278	-0.54181	-0.501667
mp-677222	-3.56544	-3.55994
mp-570425	-0.355637	-0.325307
mp-631302	0.647169	0.675702
mp-770959	-2.82181	-2.84483
mp-28487	-0.0216179	-0.0502401
mp-2323	-0.147757	-0.0976105
mp-995226	-0.696134	-0.698682
mp-773030	-2.9132	-2.89963
mp-763441	-1.66398	-1.71533
mp-779072	-2.43588	-2.43988
mp-1017519	1.43876	1.68396
mp-1014212	0.401376	0.540979
mp-754152	-2.73492	-2.77706
mp-3704	-0.714163	-0.732649
mp-767724	-2.44139	-2.44392
mp-569788	-0.267785	-0.242384
mp-1008376	-0.660442	-0.578496
mp-9318	-1.13694	-1.12221
mp-556374	-2.20821	-2.18629
mp-866216	-0.613921	-0.621118
mp-22089	-1.17887	-1.21283
mp-850292	-1.96982	-1.95399
mp-540704	-2.20242	-2.20124
mp-30171	-0.61042	-0.652603
mp-26312	-2.48667	-2.48161
mp-850277	-1.65561	-1.64545
mp-972439	-2.32639	-2.35095
mp-583234	-0.0901541	-0.0870789
mp-25694	-2.61005	-2.63956
mp-1098	-1.10956	-1.17345
mp-568522	-0.466817	-0.479043
mp-510595	-0.70586	-0.70016
mp-15694	-1.07067	-1.06075
mp-759713	-3.25883	-3.26811
mp-976972	-0.259778	-0.271101
mp-775993	-2.57295	-2.57563
mp-20496	-2.11159	-2.08896
mp-31583	-2.52912	-2.52658
mp-761979	-2.37033	-2.34342
mp-755950	-3.53927	-3.52508
mp-685120	-0.862237	-0.817992
mp-32532	-2.17433	-2.19914
mp-754751	-2.60808	-2.60204
mp-1006056	-0.380385	-0.40721
mp-706657	-2.66689	-2.64912
mp-756951	-2.08073	-2.09931
mp-778868	-2.14373	-2.11771
mp-1018067	0.0492887	0.0651748
mp-980052	-0.211904	-0.232755
mp-707311	-1.95664	-1.96403
mp-770901	-2.00596	-2.01925
mp-39387	-3.41224	-3.43349
mp-770335	-2.51043	-2.51119
mp-1018156	-0.0632135	-0.0633892
mp-558083	-3.3997	-3.41294
mp-20799	-0.436695	-0.449442
mp-643458	-2.03436	-2.07214
mp-866171	-0.771959	-0.778966
mp-16794	-0.595046	-0.642238
mp-555296	-3.21639	-3.22683
mp-780091	-1.97129	-1.96691
mp-780007	-1.94365	-1.96479
mp-865795	-0.403782	-0.366506
mp-761493	-1.9179	-1.93038
mp-765777	-2.54431	-2.53643
mp-20599	-0.18593	-0.218012
mp-972486	0.224329	0.233225
mp-1121	-0.289934	-0.279043
mp-652663	-0.824887	-0.821746
mp-705842	-1.60259	-1.59224
mp-769280	-3.43918	-3.42773
mp-770642	-2.48675	-2.47749
mp-8978	-0.986924	-0.924034
mp-5193	-2.19795	-2.17983
mp-9719	-0.592371	-0.632115
mp-771334	-2.21583	-2.18624
mp-565482	-1.88954	-1.8829
mp-765718	-2.24228	-2.26476
mp-769884	-1.71849	-1.72124
mp-24006	-1.25642	-1.26633
mp-568936	-0.045132	-0.0714085
mp-1013706	-0.466967	-0.484128
mp-27523	-1.37118	-1.33924
mp-770680	-2.22003	-2.21097
mp-764627	-2.14153	-2.1328
mp-7564	-0.450758	-0.455811
mp-12360	-0.0162289	-0.0881081
mp-765529	-1.94511	-1.93221
mp-14132	-3.72583	-3.74465
mp-13094	-0.654277	-0.64792
mp-1343	-0.327582	-0.311484
mp-676013	-1.51028	-1.4681
mp-21079	-0.661939	-0.657706
mp-504678	-1.235	-1.26659
mp-675509	-1.8775	-1.8324
mp-10856	-0.453494	-0.442705
mp-754903	-3.18428	-3.17668
mp-770048	-2.38223	-2.39406
mp-3183	-0.769059	-0.806365
mp-7973	-2.90375	-2.91066
mp-698365	-1.1801	-1.12549
mp-556303	-1.38312	-1.37721
mp-510085	-0.791206	-0.817597
mp-29070	-1.725	-1.69218
mp-761698	-1.59693	-1.47326
mp-972471	0.0254602	0.0164184
mp-769919	-1.74609	-1.72619
mp-16481	-0.502918	-0.495379
mp-757652	-1.27782	-1.29348
mp-39770	-2.62293	-2.64877
mp-29151	-1.2712	-1.29272
mp-755260	-2.38674	-2.37808
mp-767352	-2.0639	-2.09562
mp-985829	-1.81662	-2.02498
mp-866690	-1.57202	-1.57487
mp-1018792	-2.07847	-2.05262
mp-541201	-1.93172	-1.9321
mp-771665	-1.79485	-1.76746
mp-556908	-2.86675	-2.88274
mp-541629	-3.55878	-3.54038
mp-32332	-2.0774	-2.06741
mp-27971	-2.87419	-2.92415
mp-760729	-2.67066	-2.69107
mp-565930	-2.95901	-2.98645
mp-767641	-3.1369	-3.13917
mp-4194	-1.09232	-1.1302
mp-743528	-0.960285	-0.92972
mp-774369	-2.38238	-2.38234
mp-643941	-2.69264	-2.67748
mp-764729	-2.36752	-2.35336
mp-18690	-4.2478	-4.25956
mp-13944	-0.93841	-0.975172
mp-4835	-0.610697	-0.618667
mp-764013	-2.26613	-2.29723
mp-861734	-0.528617	-0.532274
mp-755445	-2.30801	-2.3076
mp-530800	-3.79374	-3.80421
mp-570138	-0.647269	-0.63566
mp-571144	-1.39547	-1.38945
mp-851039	-2.20688	-2.19522
mp-1017447	-1.22487	-1.19421
mp-974335	0.0321927	0.0516604
mp-36052	-1.9649	-1.91481
mp-866613	-2.90572	-2.90443
mp-777710	-2.95969	-2.94913
mp-4789	-2.50724	-2.49462
mp-16956	-3.07464	-3.09305
mp-25582	-2.13148	-2.11821
mp-735520	-2.1459	-2.17523
mp-2981	-2.4242	-2.41835
mp-998610	-0.979485	-0.998707
mp-636225	-2.58935	-2.58873
mp-546321	-2.78776	-2.78241
mp-31803	-1.74839	-1.78906
mp-569410	-1.08252	-1.06083
mp-25590	-2.28331	-2.31325
mp-560	-0.851142	-0.886879
mp-763959	-2.02918	-1.96981
mp-773069	-3.50987	-3.51718
mp-764651	-2.34242	-2.24104
mp-763123	-2.20888	-2.20994
mp-1018819	-0.330136	-0.333201
mp-645	-1.61083	-1.61374
mp-9753	-3.26735	-3.21312
mp-505572	-0.120448	-0.182748
mp-571163	-0.282809	-0.30057
mp-31692	-2.34823	-2.3836
mp-754555	-2.74054	-2.74623
mp-866936	-1.30029	-1.2758
mp-977562	-0.637026	-0.642555
mp-9195	-2.14973	-2.12828
mp-5175	-1.92557	-1.99865
mp-542915	-0.36845	-0.39565
mp-972912	0.0445358	0.0164407
mp-766387	-3.36593	-3.39478
mp-566150	-2.15731	-2.17557
mp-756460	-1.79126	-1.756
mp-600941	-1.79096	-1.80614
mp-695887	-2.33018	-2.34197
mp-743846	-1.96887	-1.97152
mp-771634	-2.18612	-2.18983
mp-1020010	-0.949522	-0.667974
mp-777151	-2.80723	-2.79869
mp-653823	-1.13103	-1.08108
mp-866015	-0.289229	-0.300274
mp-31380	-0.841098	-0.857663
mp-705454	-0.815049	-0.939996
mp-771338	-3.17052	-3.18492
mp-19827	-1.03437	-1.01913
mp-626496	-2.11079	-2.11519
mp-565301	-2.45471	-2.49142
mp-1013987	-1.88927	-1.85904
mp-973265	0.934868	0.979361
mp-556525	-2.9907	-2.99229
mp-763638	-2.49914	-2.51072
mp-567334	-0.836306	-0.943461
mp-19123	-2.3693	-2.37332
mp-756930	-3.051	-3.02721
mp-32642	-2.39122	-2.38484
mp-8886	-0.317733	-0.286966
mp-8121	-0.631325	-0.641907
mp-7880	-0.310974	-0.297163
mp-999083	-0.0939565	-0.0851141
mp-768030	-2.20913	-2.20702
mp-774377	-2.504	-2.49833
mp-572271	-2.60003	-2.60154
mp-773049	-2.80509	-2.78198
mp-6628	-1.12835	-1.15654
mp-6712	-2.91941	-2.92222
mp-28122	-2.51472	-2.49643
mp-27258	-0.0682292	-0.111137
mp-568539	-0.683954	-0.740007
mp-673247	-3.83774	-3.282
mp-24914	-2.59846	-2.55912
mp-972600	-2.36608	-2.36911
mp-569813	-0.290343	-0.306107
mp-557626	-3.83625	-3.84651
mp-504670	-0.553441	-0.570122
mp-767929	-2.82811	-2.84544
mp-547521	-2.56115	-2.5733
mp-778757	-1.50523	-1.53221
mp-761324	-2.09125	-2.17831
mp-999208	-0.437704	-0.27982
mp-2576	-0.533873	-0.537811
mp-961651	-0.633581	-0.537984
mp-17709	-2.49352	-2.49903
mp-560226	-3.3102	-3.30497
mp-735519	-2.99539	-2.96034
mp-19987	-0.676705	-0.529589
mp-19219	-2.51823	-2.51786
mp-775082	-1.91334	-1.96331
mp-6127	-3.02027	-3.02931
mp-20205	-2.17413	-2.24867
mp-553990	-1.46551	-1.47471
mp-767427	-2.35978	-2.3628
mp-757514	-2.47488	-2.47806
mp-770941	-2.33341	-2.33915
mp-776713	-2.48095	-2.4777
mp-759544	-1.50424	-1.48584
mp-1990	-0.476848	-0.627894
mp-764361	-2.91947	-2.91527
mp-756009	-1.11425	-1.131
mp-775732	-1.94306	-1.93241
mp-766905	-2.97319	-2.97328
mp-849394	-2.67971	-2.70276
mp-19731	-0.532254	-0.558396
mp-25696	-2.00301	-2.01099
mp-10394	-0.0864496	-0.0853586
mp-764737	-2.67215	-2.65701
mp-560601	-1.95849	-1.96493
mp-1827	-0.404749	-0.416697
mp-855	-0.0197667	-0.00908811
mp-13302	-0.744515	-0.75088
mp-777707	-2.36689	-2.37815
mp-771203	-2.31313	-2.3305
mp-566991	-2.71408	-2.70253
mp-850500	-2.45562	-2.44903
mp-9277	-1.47297	-1.45403
mp-570930	-0.412456	-0.45791
mp-22618	-2.07547	-2.07925
mp-9545	-0.288757	-0.272344
mp-23598	-1.62491	-1.62701
mp-540838	-2.34047	-2.28438
mp-697856	-2.86927	-2.86845
mp-582767	-1.9404	-1.95079
mp-763363	-2.43648	-2.41286
mp-763099	-2.63111	-2.61982
mp-5221	-0.553525	-0.574396
mp-782818	-2.6945	-2.68105
mp-769729	-1.81982	-1.81963
mp-558740	-1.82878	-1.82275
mp-10343	-0.519189	-0.570954
mp-540208	-2.51674	-2.51441
mp-4964	-1.15718	-1.2181
mp-10428	-0.132838	-0.127014
mp-23801	-1.57442	-1.54426
mp-1019549	-3.29645	-3.31827
mp-36234	-1.34791	-1.41923
mp-11037	-0.403794	-0.423699
mp-565886	-2.12174	-2.11185
mp-766163	-2.24504	-2.25515
mp-3726	-0.626526	-0.664063
mp-761590	-2.22053	-2.21555
mp-560223	-2.02254	-1.99278
mp-561902	-0.62547	-0.60929
mp-30594	-0.018214	-0.0709785
mp-18747	-2.58145	-2.5984
mp-540855	-0.342602	-0.487168
mp-1786	-0.247	-0.350936
mp-767906	-2.51149	-2.51677
mp-863377	-2.52869	-2.50568
mp-1253	-1.97037	-2.04812
mp-13541	-3.18859	-3.20695
mp-30537	-2.8406	-2.84645
mp-20689	-0.633043	-0.625187
mp-779854	-2.5053	-2.50764
mp-764053	-2.9067	-2.88332
mp-568545	-0.319019	-0.339521
mp-866972	-1.56643	-1.58516
mp-977559	-0.768514	-0.771115
mp-567957	-0.316647	-0.363653
mp-16234	-0.443917	-0.436696
mp-998241	-2.52717	-2.52583
mp-765818	-1.34661	-1.36551
mp-35539	-0.508118	-0.507664
mp-973920	-2.98737	-2.70645
mp-7221	-0.540311	-0.502653
mp-770155	-2.56831	-2.58987
mp-556137	-3.31751	-3.32326
mp-866660	-0.559648	-0.563121
mp-19284	-0.699836	-0.678842
mp-774093	-2.37718	-2.38051
mp-769626	-2.39924	-2.34808
mp-2719	-0.567245	-0.600036
mp-632402	-3.89426	-3.83365
mp-4487	-0.459134	-0.469877
mp-12533	-4.03037	-4.06599
mp-978695	-0.913322	-0.956034
mp-27607	-0.253384	-0.263756
mp-763082	-1.953	-1.95325
mp-10347	-3.3272	-3.34397
mp-650178	-1.09582	-1.02288
mp-21628	-0.247711	-0.220456
mp-569161	-1.39322	-1.37352
mp-864734	-0.678104	-0.693325
mp-28489	-0.936569	-0.913228
mp-765828	-2.00767	-2.01819
mp-2954	-0.561421	-0.552481
mp-778794	-2.12446	-2.13877
mp-27834	-1.16262	-1.17224
mp-777056	-2.47808	-2.49643
mp-973109	-0.661495	-0.652368
mp-505807	-0.172956	-0.174995
mp-11571	-0.424272	-0.417
mp-755512	-3.68276	-3.70535
mp-565583	-3.33409	-3.3432
mp-765139	-2.62921	-2.61313
mp-567722	-1.31854	-1.35908
mp-1008926	-0.126409	0.11738
mp-34296	-1.82337	-1.84749
mp-39888	-2.5884	-2.56123
mp-763557	-2.36327	-2.34849
mp-771994	-1.12555	-1.14188
mp-625548	-1.37222	-1.38475
mp-541168	-2.93825	-2.94154
mp-775402	-1.10934	-1.10413
mp-225	-0.259072	-0.262028
mp-567597	0.036985	0.0608161
mp-779269	-2.65407	-2.6443
mp-1007918	-0.878205	-0.88611
mp-12286	-3.5143	-3.52504
mp-764834	-1.5751	-1.595
mp-567248	-0.432704	-0.426533
mp-13378	-0.721919	-0.731765
mp-1018083	-0.277011	-0.138448
mp-24091	-1.90707	-1.87713
mp-680944	-3.05181	-3.05792
mp-6027	-1.81832	-1.79943
mp-755446	-2.16692	-2.08322
mp-1719	-1.49167	-1.43797
mp-743873	-2.82338	-2.84009
mp-763584	-2.36658	-2.36917
mp-29096	-0.516964	-0.510661
mp-28085	-2.69765	-2.65038
mp-721943	-1.86897	-1.86346
mp-763827	-2.53047	-2.51672
mp-27779	-1.26606	-1.2826
mp-20151	-0.384699	-0.423065
mp-705514	-0.677747	-0.699689
mp-704198	-2.45662	-2.46078
mp-775778	-2.75147	-2.82173
mp-674352	-0.524022	-0.513402
mp-505815	-1.59634	-1.59091
mp-762382	-2.48074	-2.4708
mp-771423	-2.1993	-2.2299
mp-35889	-1.20245	-0.962437
mp-973633	-0.781262	-0.793301
mp-676349	-0.498954	-0.504218
mp-1675	-0.764962	-0.780842
mp-771904	-2.18472	-2.18298
mp-27064	-2.19208	-2.20195
mp-765853	-2.8807	-2.87432
mp-19833	-0.714567	-0.762356
mp-698728	-1.8507	-1.67302
mp-4555	-2.25402	-2.2537
mp-556489	-2.97194	-3.00893
mp-776091	-3.04169	-3.05387
mp-762693	-2.3142	-2.29778
mp-20906	-0.316186	-0.328218
mp-778071	-4.29175	-4.28986
mp-557844	-3.0144	-3.02867
mp-972272	-0.70204	-0.719312
mp-16599	-2.85104	-2.86104
mp-761254	-2.50573	-2.52173
mp-636105	-0.0634978	-0.0944834
mp-542220	-0.294382	-0.231446
mp-10895	-0.245775	-0.314064
mp-557989	-1.99672	-1.99551
mp-674366	-2.77158	-2.7599
mp-505139	-2.31902	-2.27604
mp-685168	-3.50823	-3.45669
mp-775116	-2.53249	-2.53751
mp-865848	-0.338219	-0.331109
mp-510374	-1.50285	-1.53677
mp-978853	-0.623683	-0.643284
mp-2619	0.0213678	0.0217654
mp-4041	-0.405649	-0.434275
mp-19865	-0.439445	-0.421764
mp-774048	-2.57155	-2.57743
mp-540440	-2.24068	-2.26473
mp-779798	-2.21521	-2.21937
mp-1527	-0.245856	-0.265265
mp-771872	-2.0462	-2.0451
mp-3777	-1.29802	-1.317
mp-10950	-2.87621	-2.90205
mp-173	-0.15913	-0.170753
mp-767701	-2.47475	-2.49518
mp-1017982	0.760171	0.724664
mp-776049	-2.44417	-2.45794
mp-999540	-0.388565	-0.360264
mp-780147	-2.58841	-2.5836
mp-24044	-1.51342	-1.47803
mp-554475	-3.26617	-3.22354
mp-771064	-2.39848	-2.42112
mp-567401	-0.545645	-0.477354
mp-13536	-0.452629	-0.452167
mp-776001	-2.47766	-2.49086
mp-11666	-0.413479	-0.417969
mp-1002124	-0.366496	-0.301016
mp-755018	-3.02212	-2.99488
mp-775647	-2.10026	-2.09353
mp-765454	-2.47789	-2.45746
mp-975216	-1.85851	-1.99623
mp-738629	-1.60757	-1.60061
mp-19416	-3.07759	-3.08159
mp-555717	-2.44524	-2.48859
mp-997008	-0.813347	-0.78539
mp-705332	-2.35479	-2.37873
mp-765969	-2.22736	-2.21963
mp-989565	-2.84267	-2.84648
mp-7499	-0.749125	-0.761783
mp-776115	-2.24932	-2.27762
mp-771213	-2.60631	-2.61471
mp-555884	-2.01581	-2.01171
mp-999068	-0.0622231	-0.104204
mp-570403	-0.283186	-0.288576
mp-637201	-2.29899	-2.30952
mp-755543	-3.05378	-3.04937
mp-12778	-0.338992	-0.236019
mp-971826	0.267078	0.418425
mp-972510	-0.836633	-0.838612
mp-558056	-3.13828	-3.13195
mp-7109	-1.00098	-0.978247
mp-31347	-0.735659	-0.748688
mp-777495	-2.66141	-2.68228
mp-6565	-3.12536	-3.14154
mp-669326	-0.584156	-0.590579
mp-697111	-1.38423	-1.39311
mp-770171	-2.66021	-2.67795
mp-559614	-2.58675	-2.58026
mp-770702	-2.47767	-2.48582
mp-6507	-2.59884	-2.59241
mp-3797	-1.18153	-1.20624
mp-41734	-3.03547	-3.04934
mp-514	-0.204711	-0.209845
mp-771534	-2.21877	-2.23196
mp-630820	-0.529817	-0.551392
mp-649033	-0.804042	-0.802948
mp-763439	-3.21725	-3.21476
mp-25017	-2.67929	-2.66693
mp-7792	-2.38552	-2.38762
mp-30717	-0.260252	-0.271518
mp-672273	-1.67848	-1.69703
mp-773165	-1.49762	-1.51543
mp-772258	-2.63478	-2.66265
mp-12689	-0.878451	-0.881788
mp-5476	-3.39413	-3.43877
mp-36252	-1.62508	-1.63606
mp-684024	-1.04747	-1.1172
mp-972117	-2.41215	-2.39754
mp-542675	-1.39101	-1.40836
mp-25405	-2.15248	-2.16944
mp-642804	-2.00032	-2.04478
mp-25485	-1.92953	-1.89699
mp-752666	-1.84758	-1.86232
mp-770337	-2.28956	-2.28957
mp-849685	-1.36104	-1.39787
mp-4865	-0.661121	-0.675743
mp-12146	-3.52657	-3.5408
mp-2250	-0.451265	-0.410028
mp-557035	-2.51434	-2.51345
mp-774121	-2.43026	-2.45749
mp-951	-0.697223	-0.72387
mp-19249	-1.94246	-1.89331
mp-753823	-4.21491	-4.27608
mp-640859	-1.86322	-1.85859
mp-759735	-2.54311	-2.5395
mp-622491	-1.37756	-1.38085
mp-705002	-2.63331	-2.64186
mp-771353	-2.5353	-2.54738
mp-643564	-1.82957	-1.85004
mp-557450	-1.52504	-1.5076
mp-15551	-0.431666	-0.443354
mp-550579	-2.74564	-2.78952
mp-569486	-0.245497	-0.30103
mp-25612	-2.25277	-2.26058
mp-15362	-3.09773	-3.10673
mp-541753	-1.09867	-1.11602
mp-1739	-0.673415	-0.678929
mp-8540	-0.333806	-0.27694
mp-764812	-2.86247	-2.85309
mp-32373	-2.29553	-2.31725
mp-763490	-2.82595	-2.82378
mp-755010	-2.54582	-2.33608
mp-680671	-0.0588669	-0.126834
mp-29375	-1.24046	-1.25999
mp-17677	-3.03292	-3.03215
mp-754540	-1.12227	-1.15979
mp-27980	-3.69746	-3.69074
mp-12631	-2.47477	-2.4782
mp-7664	-1.55198	-1.55411
mp-18612	-1.31925	-1.32518
mp-780115	-2.57991	-2.57509
mp-774309	-2.66014	-2.66814
mp-775125	-2.51024	-2.52831
mp-767081	-2.03639	-2.08357
mp-759381	-2.47699	-2.49725
mp-772610	-2.02134	-2.02314
mp-767355	-2.1119	-2.1273
mp-753802	-3.74701	-3.74836
mp-769813	-2.51907	-2.52218
mp-16622	-0.503329	-0.520827
mp-4066	-2.19952	-2.20812
mp-868564	-1.88158	-1.83682
mp-542926	-3.02241	-3.03926
mp-24131	-0.685647	-0.68858
mp-10889	-0.154885	-0.189959
mp-763718	-2.78529	-2.78433
mp-763057	-1.3116	-1.34112
mp-539	-1.06586	-1.06193
mp-623088	-3.62155	-3.491
mp-773242	-2.25192	-2.28526
mp-761563	-1.86452	-1.86439
mp-15438	-2.4904	-2.50117
mp-573498	-0.374841	-0.374516
mp-24589	-1.6359	-1.67592
mp-1019525	-3.02856	-3.03527
mp-12108	-0.470157	-0.554891
mp-973981	-3.15427	-3.19012
mp-767900	-2.64611	-2.6557
mp-17434	-3.7686	-3.75999
mp-21901	-0.34346	-0.331894
mp-996962	-1.02525	-1.12127
mp-557019	-2.43797	-2.43655
mp-540832	-2.51789	-2.53692
mp-32884	-0.269657	-0.274491
mp-705083	-2.06984	-2.05901
mp-559955	-1.89455	-1.88759
mp-754833	-2.47231	-2.47828
mp-14015	0.00404933	-0.00680364
mp-24831	-1.46033	-1.46768
mp-582389	-0.436299	-0.393237
mp-675751	-3.41954	-3.42308
mp-559610	-2.9448	-2.94084
mp-19956	-2.87304	-2.8843
mp-23261	-0.757762	-0.776406
mp-556339	-1.06334	-1.07482
mp-14763	-0.996313	-1.03127
mp-604459	-2.34161	-2.3652
mp-567141	-1.81839	-1.71915
mp-775022	-2.30308	-2.34325
mp-774714	-2.5211	-2.54145
mp-505702	-1.69038	-1.74066
mp-764713	-2.49916	-2.51933
mp-19581	-2.94838	-2.9772
mp-776038	-2.85808	-2.85779
mp-782053	-2.81093	-2.84282
mp-753524	-1.99408	-2.04685
mp-7638	-3.27562	-3.27709
mp-865427	-2.79868	-2.80347
mp-19496	-2.2626	-2.2598
mp-763436	-2.20159	-2.19953
mp-998988	-0.237766	-0.18946
mp-775753	-2.47529	-2.49628
mp-16988	-1.09806	-1.11091
mp-726	-1.14913	-1.17175
mp-672223	-1.66184	-1.49168
mp-29806	-0.782665	-0.786987
mp-767621	-2.4354	-2.44998
mp-16356	-0.643461	-0.676291
mp-773719	-1.83445	-1.82409
mp-771986	-1.78409	-1.81072
mp-961650	0.378528	0.375707
mp-542879	-0.299601	-0.308265
mp-864889	-0.281204	-0.280297
mp-24151	-0.764333	-0.786642
mp-755920	-3.03511	-3.08338
mp-759790	0.0882942	0.0635746
mp-24927	-1.87941	-2.02131
mp-779689	-0.558649	-0.519317
mp-554227	-2.51168	-2.51165
mp-764455	-2.24355	-2.25039
mp-758841	-1.99654	-1.88294
mp-555005	-2.80749	-2.81611
mp-36699	-3.91147	-3.92881
mp-756452	-3.86953	-3.88214
mp-775715	-2.08855	-2.10363
mp-775628	-2.74468	-2.74695
mp-762264	-2.49175	-2.45993
mp-28708	-2.2915	-2.31753
mp-694892	-2.89488	-2.90915
mp-735589	-2.76076	-2.75693
mp-371	-0.198459	-0.245337
mp-5380	-1.7924	-1.77922
mp-557748	-1.94278	-1.9451
mp-677217	-1.15157	-1.12622
mp-557668	-2.22658	-2.21819
mp-764943	-2.34113	-2.30856
mp-773247	-1.59716	-1.58985
mp-961666	0.264662	0.392545
mp-780123	-2.40699	-2.4194
mp-770667	-2.22802	-2.23869
mp-776184	-2.07769	-2.10644
mp-866117	-0.44009	-0.436073
mp-950217	-0.366931	-0.262991
mp-771668	-2.4671	-2.36435
mp-759198	-2.46199	-2.45054
mp-972914	-0.344376	-0.361647
mp-849474	-1.75658	-1.75013
mp-867215	-0.43096	-0.438382
mp-1016106	-0.0573289	-0.0598072
mp-1013749	-2.60477	-2.50095
mp-761298	-2.61297	-2.62018
mp-30159	-1.3409	-1.30983
mp-767576	-2.18398	-2.2044
mp-867895	-0.213792	-0.23035
mp-1019596	-3.83312	-3.85023
mp-10892	-0.655221	-0.641227
mp-762279	-3.3862	-3.3948
mp-757173	-1.78916	-1.79511
mp-26377	-2.58511	-2.60082
mp-767041	-1.95811	-1.96128
mp-863066	-2.9052	-2.92125
mp-764215	-2.07283	-2.17004
mp-771622	-2.37339	-2.35515
mp-2281	-1.13976	-1.17602
mp-1638	-0.278714	-0.253989
mp-1018123	-0.422921	-0.424428
mp-17897	-3.14615	-3.15562
mp-772245	-1.60255	-1.6489
mp-27999	-0.339423	-0.359449
mp-779518	-2.77061	-2.7957
mp-971859	0.764332	0.628398
mp-7961	-1.67855	-1.6605
mp-541837	-0.340584	-0.383905
mp-763386	-2.44804	-2.45314
mp-631331	0.740729	0.646559
mp-28997	-0.677945	-0.653244
mp-644280	-0.44778	-0.479617
mp-557134	-3.22235	-3.20326
mp-752733	-2.69444	-2.67403
mp-21684	-0.520487	-0.528644
mp-771235	-3.43395	-3.43062
mp-27600	-2.26176	-2.25414
mp-761816	-1.44712	-1.44954
mp-19932	-0.423418	-0.417443
mp-850372	-2.47036	-2.46616
mp-25625	-2.24607	-2.20502
mp-1529	-1.03726	-0.99507
mp-764494	-2.74333	-2.73818
mp-27140	-1.98654	-1.9956
mp-556674	-2.57538	-2.57787
mp-14243	-1.52735	-1.53755
mp-18373	-1.38607	-1.38901
mp-566592	-2.3197	-2.31751
mp-984717	-0.266815	-0.146492
mp-13042	-3.19322	-3.18553
mp-474	-0.124199	-0.12359
mp-765708	-3.04483	-3.0481
mp-769799	-1.61632	-1.6592
mp-754790	-2.69399	-2.69277
mp-7226	-0.101185	-0.155972
mp-765886	-1.51786	-1.57207
mp-762973	-2.61608	-2.6217
mp-762247	-2.32051	-2.32692
mp-569428	-0.0282037	-0.0441288
mp-31036	-0.184785	-0.201757
mp-554918	-3.50849	-3.53276
mp-542933	-0.174877	-0.18077
mp-1180	-0.295955	-0.361485
mp-16826	-0.954712	-0.968191
mp-1008	0.286944	0.222986
mp-771303	-2.54774	-2.51434
mp-766777	-2.51479	-2.54054
mp-740719	-1.87165	-1.89679
mp-17777	-2.84683	-2.87481
mp-762724	-2.597	-2.58764
mp-778709	-2.32113	-2.31768
mp-864981	-0.609089	-0.608547
mp-556975	-1.92784	-1.94135
mp-1008752	-1.22046	-1.23602
mp-763242	-2.74911	-2.75676
mp-765364	-2.25758	-2.27406
mp-853140	-2.52265	-2.53291
mp-30119	-2.01026	-2.0229
mp-721347	-2.31901	-2.32399
mp-762819	-2.05462	-2.02226
mp-542078	-0.911594	-0.905477
mp-782641	-2.13612	-2.14366
mp-771068	-2.3604	-2.38347
mp-851007	-2.06849	-2.01189
mp-3216	-1.18208	-1.25735
mp-11644	0.047663	-0.0132917
mp-707285	-1.16313	-1.14401
mp-977586	-0.256672	-0.29159
mp-770330	-2.55615	-2.56235
mp-866500	-1.9641	-1.96948
mp-757806	-2.51443	-2.51423
mp-580748	-0.564543	-0.561984
mp-23583	-1.82599	-1.79592
mp-765381	-2.70315	-2.70368
mp-977438	-0.506609	-0.544975
mp-626193	-2.28475	-2.30418
mp-30251	-2.55424	-2.58907
mp-765595	-2.43254	-2.43395
mp-30473	-0.485262	-0.512028
mp-555147	-3.21448	-3.19887
mp-975397	0.203957	0.150797
mp-776061	-2.84483	-2.85543
mp-18163	-0.499932	-0.506945
mp-28320	-0.0987806	-0.161132
mp-29724	-0.260506	-0.271804
mp-763081	-2.2071	-2.21483
mp-766360	-2.45942	-2.46763
mp-558724	-2.10506	-2.07919
mp-767695	-2.86674	-2.86855
mp-565656	-2.81762	-2.8189
mp-974221	-0.311579	-0.31249
mp-23944	-1.29428	-1.2935
mp-754246	-2.72294	-2.77485
mp-20643	-2.59461	-2.59595
mp-16504	-0.542419	-0.544962
mp-603327	-1.28691	-1.32544
mp-560535	-2.91572	-2.92747
mp-704836	-2.44671	-2.42593
mp-30278	-0.978439	-0.944731
mp-764218	-2.78612	-2.79359
mp-4993	-0.828481	-0.843626
mp-772348	-2.03005	-2.00438
mp-540940	-0.630639	-0.675402
mp-770968	-2.17727	-2.19274
mp-4438	-2.64914	-2.68626
mp-35929	-2.08753	-2.09912
mp-603609	-1.46208	-1.4447
mp-767716	-2.99598	-2.98677
mp-556592	-0.713215	-0.740221
mp-754408	-1.72105	-1.71481
mp-7073	-2.01258	-2.047
mp-30479	-0.368099	-0.383578
mp-754202	-1.21902	-1.28421
mp-2617	-0.221826	-0.256562
mp-690684	-1.88153	-1.92039
mp-778325	-2.70044	-2.71725
mp-763359	-1.89347	-1.87541
mp-686947	-2.71594	-2.71839
mp-15178	-0.278838	-0.323484
mp-556262	-3.25752	-3.27436
mp-571662	-0.863985	-0.856627
mp-567278	-1.30956	-1.31597
mp-7263	-0.901771	-0.847944
mp-550893	-3.98663	-3.95507
mp-776357	-2.82179	-2.78531
mp-23552	-1.49795	-1.50995
mp-770311	-2.56669	-2.5655
mp-997013	-0.34506	-0.413127
mp-27987	-1.2191	-1.34642
mp-2183	-1.63509	-1.54774
mp-647818	-2.18093	-2.2355
mp-23152	0.00194691	0
mp-764981	-2.88092	-2.8711
mp-8966	-0.715844	-0.727442
mp-631303	0.804197	0.658559
mp-29221	-4.09026	-4.10995
mp-675472	-3.15098	-3.13316
mp-510486	-0.467064	-0.576628
mp-865002	-0.585871	-0.59911
mp-917	-0.0240413	0.0155134
mp-12233	-2.72111	-2.70541
mp-540966	-0.682988	-0.607716
mp-30771	-0.447973	-0.442064
mp-16035	-3.18609	-3.21566
mp-569952	-1.71926	-1.73534
mp-989594	-0.184057	-0.198605
mp-698600	-2.04928	-2.03603
mp-771902	-2.55151	-2.55595
mp-771616	-2.14014	-2.15789
mp-505186	-1.35399	-1.31827
mp-30335	-0.141936	-0.166394
mp-27227	-0.764815	-0.822067
mp-1275	-0.173766	-0.297078
mp-759673	-2.49585	-2.51391
mp-21466	-2.53602	-2.53846
mp-24095	-0.691832	-0.705954
mp-546621	-2.36578	-2.37188
mp-18164	-2.29289	-2.3265
mp-554766	-1.89351	-1.82005
mp-763952	-2.14047	-2.12615
mp-36529	-2.17981	-2.19985
mp-631387	0.767802	0.594772
mp-778920	-2.49322	-2.49329
mp-504795	-2.26629	-2.27152
mp-17649	-2.5445	-2.49733
mp-776273	-2.2707	-2.28854
mp-600016	-3.26777	-3.27827
mp-9522	-1.43974	-1.4827
mp-778706	-2.27105	-2.26704
mp-765457	-3.03548	-3.02781
mp-20337	-2.81524	-2.8661
mp-775327	-2.41948	-2.45039
mp-780479	-2.42665	-2.43235
mp-8638	0.0214126	0.0694062
mp-773726	-2.38012	-2.39107
mp-767296	-2.65274	-2.64693
mp-32113	-2.3901	-2.41636
mp-781698	-1.44022	-1.48443
mp-768510	-2.64197	-2.65725
mp-12563	-0.727095	-0.576455
mp-977439	-0.2532	-0.245266
mp-11690	-0.550337	-0.537903
mp-1018732	-1.12743	-1.12701
mp-30343	-0.0414621	-0.0403464
mp-772013	-2.52378	-2.53504
mp-777942	-0.416191	-0.377971
mp-676643	-1.78818	-1.87487
mp-25057	-2.20374	-2.2046
mp-782009	-1.93344	-1.94776
mp-27840	-0.452501	-0.496141
mp-977239	0.479334	0.418103
mp-635	-0.540426	-0.616035
mp-542452	-1.25843	-1.25556
mp-768486	-1.9271	-1.91616
mp-781607	-2.40799	-2.41157
mp-569849	-0.202404	-0.233378
mp-770032	-2.23114	-2.23596
mp-765498	-2.90364	-2.92065
mp-541938	-0.528157	-0.543869
mp-13938	-3.03118	-3.0294
mp-774	-0.128624	-0.109745
mp-8116	-1.06313	-1.07707
mp-696878	-2.70271	-2.75292
mp-21222	-0.721711	-0.73332
mp-765930	-1.97323	-1.95551
mp-866150	-0.132958	-0.140969
mp-772006	-2.36257	-2.41097
mp-541062	-1.01049	-1.01535
mp-760255	-2.60507	-2.61672
mp-680472	-0.773459	-0.76488
mp-763333	-2.67155	-2.65753
[truncated: 7,275 more rows]
